# Supplementary material for: Enantioselective synthesis of chiral α,β-unsaturated γ-substituted butyrolactams by organocatalyzed direct asymmetric vinylogous Michael addition of α,β-unsaturated γ-butyrolactam to 2-enoylpyridines
Source: Royal Society of Chemistry journal article supplement (doi:10.1039/c6ob01191h), 2016-01-01
Supplement: c6ob01191h1.pdf [file c6ob01191h1.pdf]

**Enantioselective synthesis of chiral  $\alpha,\beta$ -unsaturated  
 $\gamma$ -substituted butyrolactams by organocatalyzed direct  
asymmetric vinylogous Michael addition of  $\alpha,\beta$ -unsaturated  
 $\gamma$ -butyrolactam to 2-enoylpyridines**

Zhen-Hua Wang,<sup>a,c</sup> Zhi-Jun Wu,<sup>b</sup> Deng-Feng Yue,<sup>a,c</sup> Yong You<sup>a,c</sup> Xiao-Ying Xu,<sup>\*,a</sup>  
Xiao-Mei Zhang<sup>a</sup> and Wei-Cheng Yuan<sup>\*,a</sup>

<sup>a</sup> National Engineering Research Center of Chiral Drugs, Chengdu Institute of Organic Chemistry, Chinese Academy of Sciences, Chengdu 610041, China

<sup>b</sup> Chengdu Institute of Biology, Chinese Academy of Sciences, Chengdu 610041, China

<sup>c</sup> University of Chinese Academy of Sciences, Beijing 100049, China

\*E-mail: yuanwc@cioc.ac.cn

xuxy@cioc.ac.cn

**Supporting Information**

**Table of Contents**

1. X-ray crystal structure of compound **3s**.....S1
2. <sup>1</sup>H, <sup>13</sup>C NMR and HPLC spectra for compounds **3a-x** and compounds **4, 5, and 6**.....S2

## 1. X-ray crystallography of compound **3s**

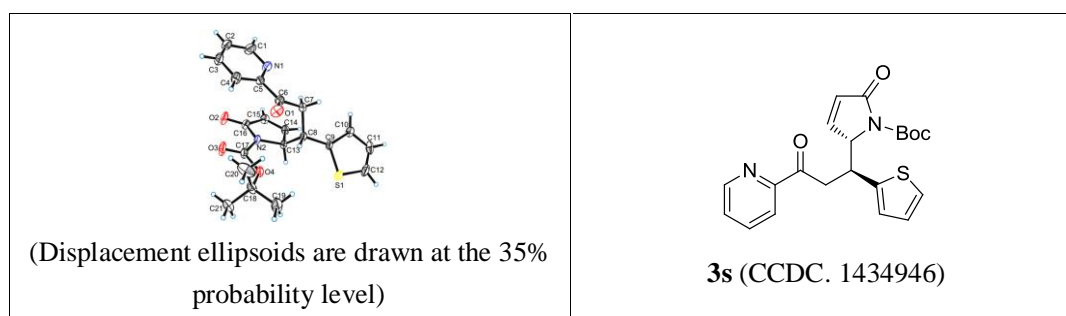

|                                             |                                                                 |
|---------------------------------------------|-----------------------------------------------------------------|
| Identification code                         | <b>3s</b>                                                       |
| Empirical formula                           | C <sub>21</sub> H <sub>22</sub> N <sub>2</sub> O <sub>4</sub> S |
| Formula weight                              | 398.46                                                          |
| Temperature/K                               | 291(2)                                                          |
| Crystal system                              | orthorhombic                                                    |
| Space group                                 | P2 <sub>1</sub> 2 <sub>1</sub> 2 <sub>1</sub>                   |
| a/Å                                         | 8.291(5)                                                        |
| b/Å                                         | 10.918(5)                                                       |
| c/Å                                         | 22.462(5)                                                       |
| α/°                                         | 90.000(5)                                                       |
| β/°                                         | 90.000(5)                                                       |
| γ/°                                         | 90.000(5)                                                       |
| Volume/Å <sup>3</sup>                       | 2033.3(16)                                                      |
| Z                                           | 4                                                               |
| ρ <sub>calc</sub> /cm <sup>3</sup>          | 1.302                                                           |
| μ/mm <sup>-1</sup>                          | 1.659                                                           |
| F(000)                                      | 840.0                                                           |
| Crystal size/mm <sup>3</sup>                | 0.420 × 0.400 × 0.350                                           |
| Radiation                                   | CuKα (λ = 1.54184)                                              |
| 2θ range for data collection/°              | 7.872 to 139.54                                                 |
| Index ranges                                | -9 ≤ h ≤ 7, -12 ≤ k ≤ 10, -25 ≤ l ≤ 26                          |
| Reflections collected                       | 5986                                                            |
| Independent reflections                     | 3612 [R <sub>int</sub> = 0.0283, R <sub>sigma</sub> = 0.0348]   |
| Data/restraints/parameters                  | 3612/2/260                                                      |
| Goodness-of-fit on F <sup>2</sup>           | 1.087                                                           |
| Final R indexes [I ≥ 2σ (I)]                | R <sub>1</sub> = 0.0454, wR <sub>2</sub> = 0.1149               |
| Final R indexes [all data]                  | R <sub>1</sub> = 0.0552, wR <sub>2</sub> = 0.1357               |
| Largest diff. peak/hole / e Å <sup>-3</sup> | 0.19/-0.21                                                      |
| Flack parameter                             | 0.058(19)                                                       |

2  $^1\text{H}$ ,  $^{13}\text{C}$  NMR, and HPLC spectra for compounds 3a-v, and compounds 4, 5, and 6.

$^1\text{H}$  NMR,  $^{13}\text{C}$  NMR and HPLC of 3a

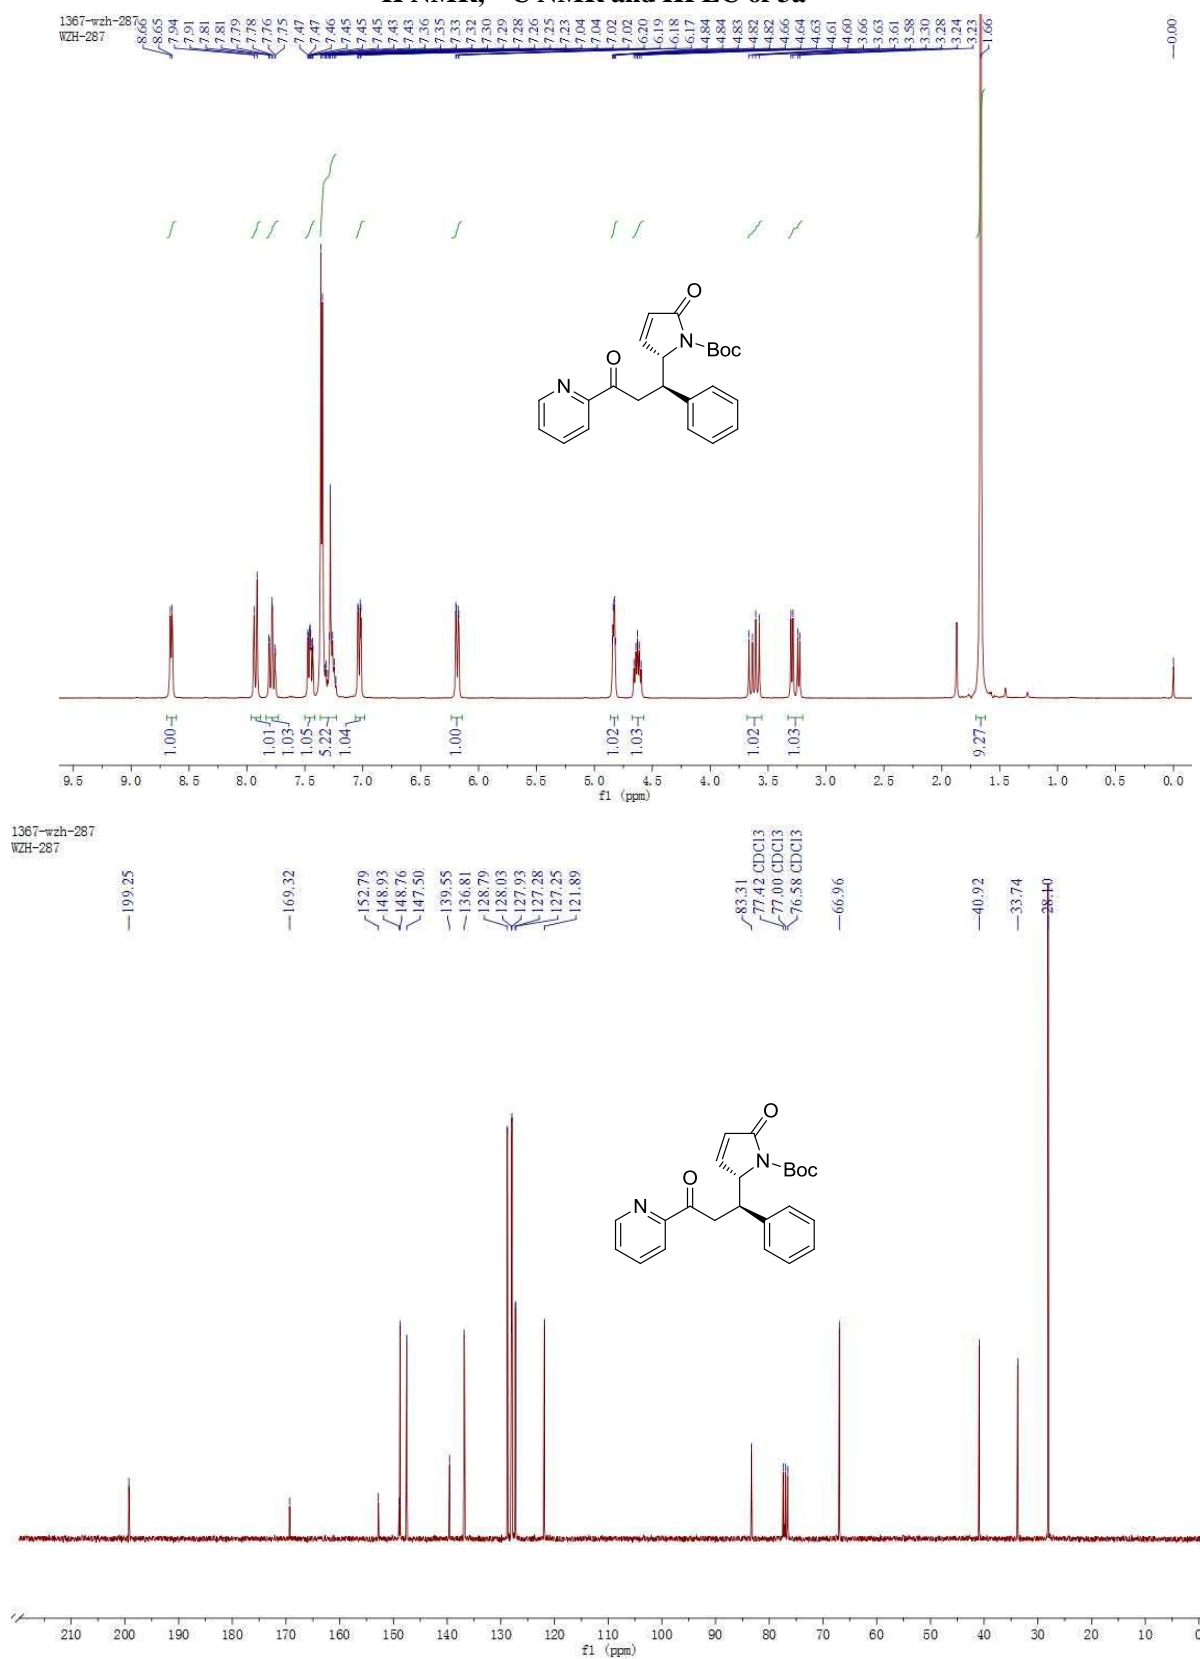

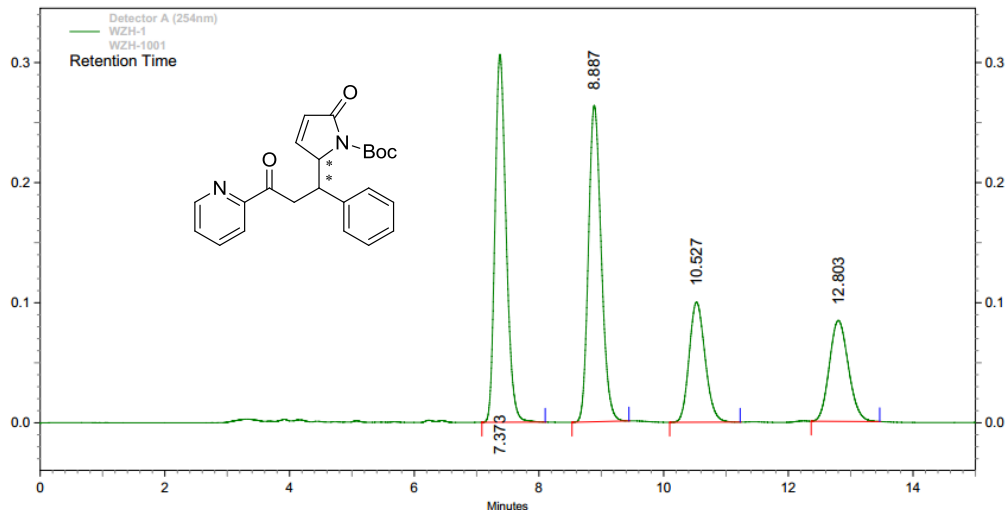

Detector  
A  
(254nm)

| PK # | Retention Time | Height | Height Percent | Area    | Area Percent |
|------|----------------|--------|----------------|---------|--------------|
| 1    | 7.373          | 306412 | 40.64          | 3806931 | 34.22        |
| 2    | 8.887          | 263451 | 34.94          | 3752158 | 33.73        |
| 3    | 10.527         | 100048 | 13.27          | 1780326 | 16.00        |
| 4    | 12.803         | 84028  | 11.15          | 1784165 | 16.04        |

| Totals |  | 753939 | 100.00 | 11123580 | 100.00 |
|--------|--|--------|--------|----------|--------|
|--------|--|--------|--------|----------|--------|

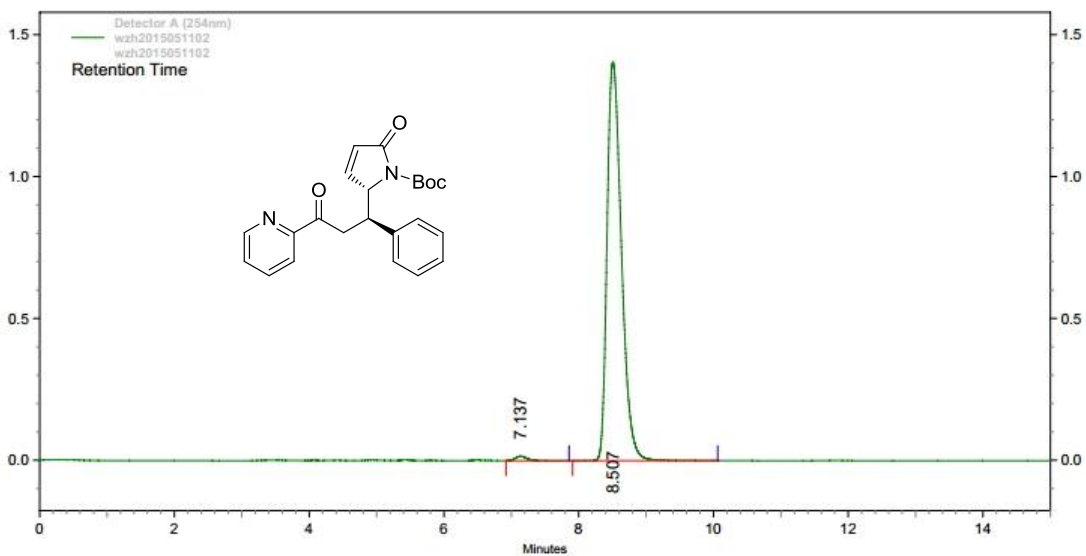

Detector  
A  
(254nm)

| PK # | Retention Time | Height  | Height Percent | Area     | Area Percent |
|------|----------------|---------|----------------|----------|--------------|
| 1    | 7.137          | 15747   | 1.11           | 184096   | 0.88         |
| 2    | 8.507          | 1404848 | 98.89          | 20741869 | 99.12        |

| Totals |  | 1420595 | 100.00 | 20925965 | 100.00 |
|--------|--|---------|--------|----------|--------|
|--------|--|---------|--------|----------|--------|

# <sup>1</sup>H NMR, <sup>13</sup>C NMR and HPLC of 3b

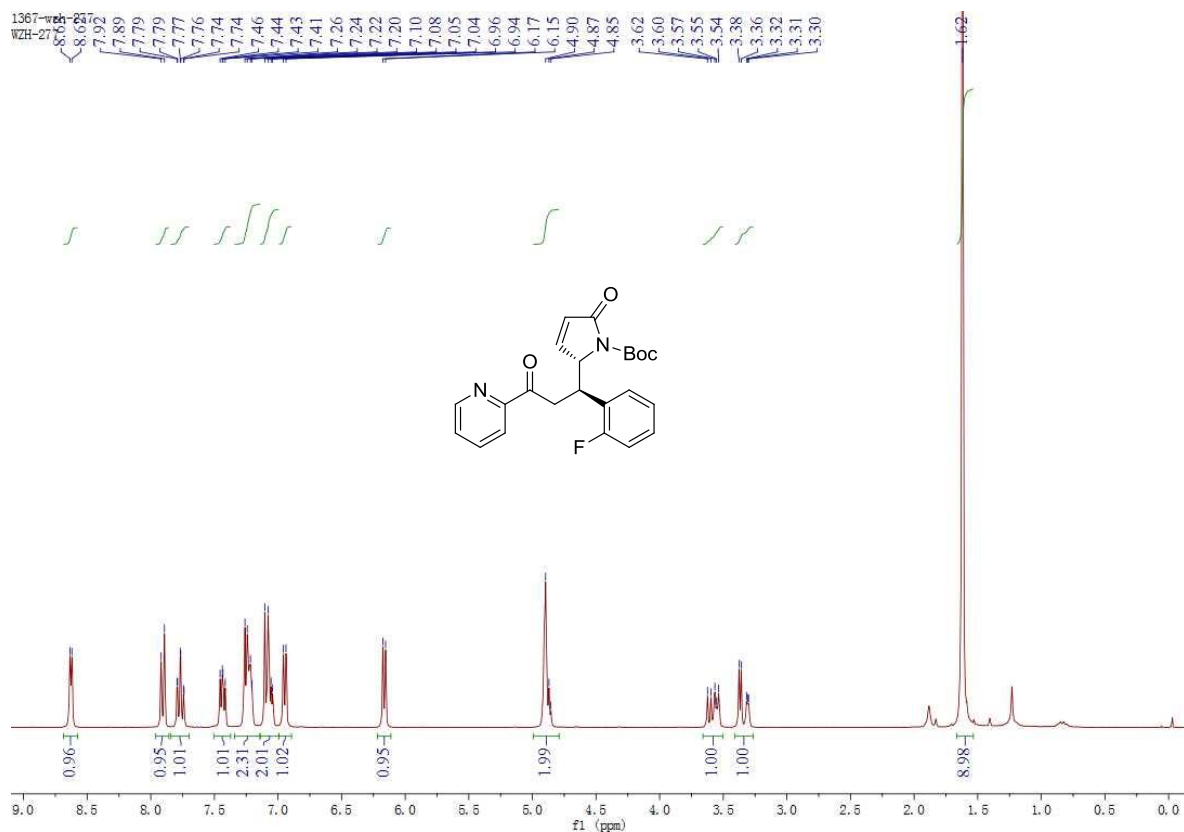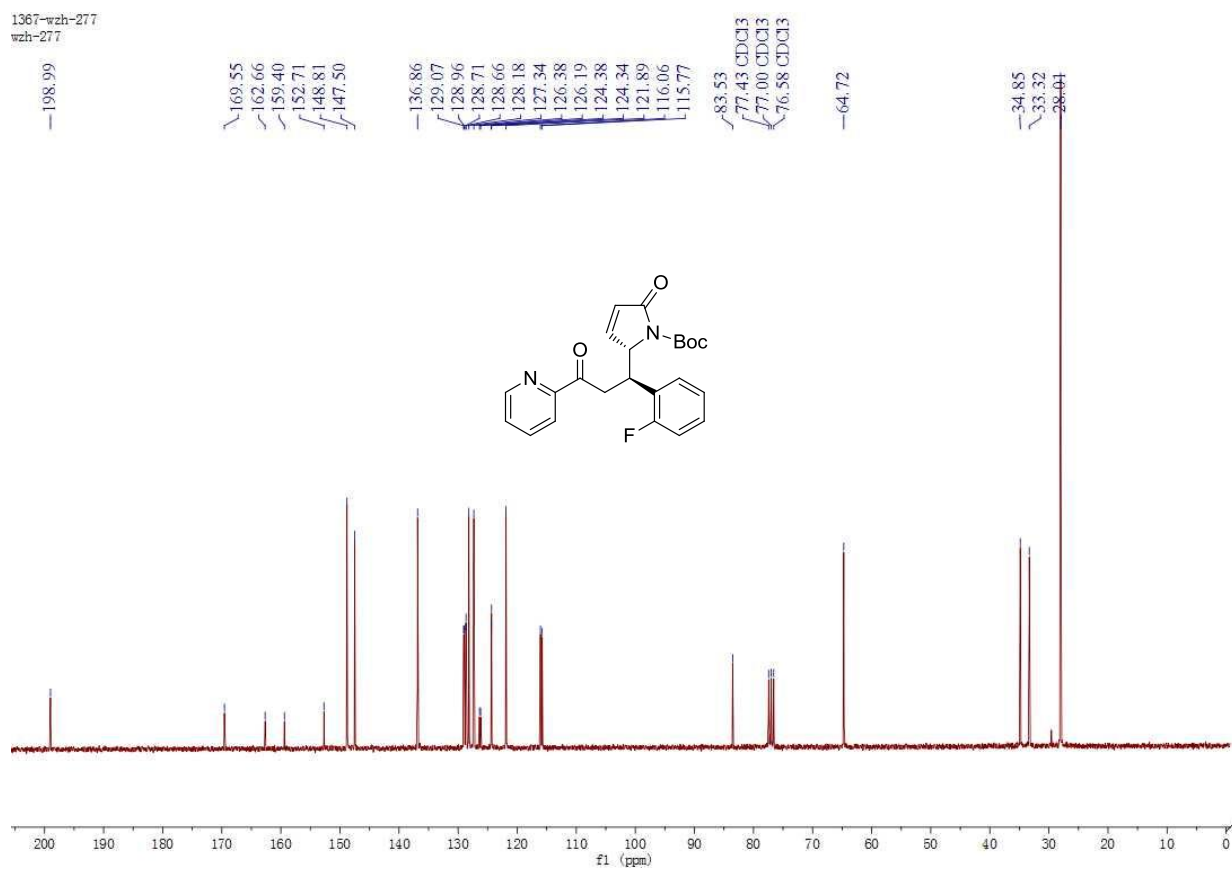

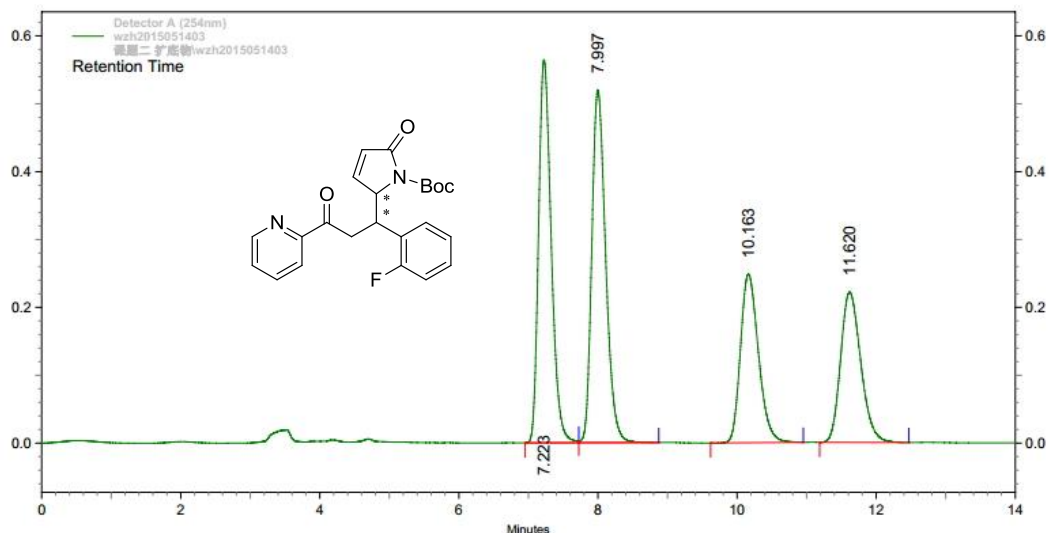

Detector  
A  
(254nm)

| Pk # | Retention Time | Height | Height Percent | Area    | Area Percent |
|------|----------------|--------|----------------|---------|--------------|
| 1    | 7.223          | 564153 | 36.30          | 7107613 | 30.60        |
| 2    | 7.997          | 519849 | 33.45          | 7188509 | 30.95        |
| 3    | 10.163         | 248489 | 15.99          | 4469084 | 19.24        |
| 4    | 11.620         | 221523 | 14.25          | 4463507 | 19.22        |

| Totals |  | 1554014 | 100.00 | 23228713 | 100.00 |
|--------|--|---------|--------|----------|--------|
|--------|--|---------|--------|----------|--------|

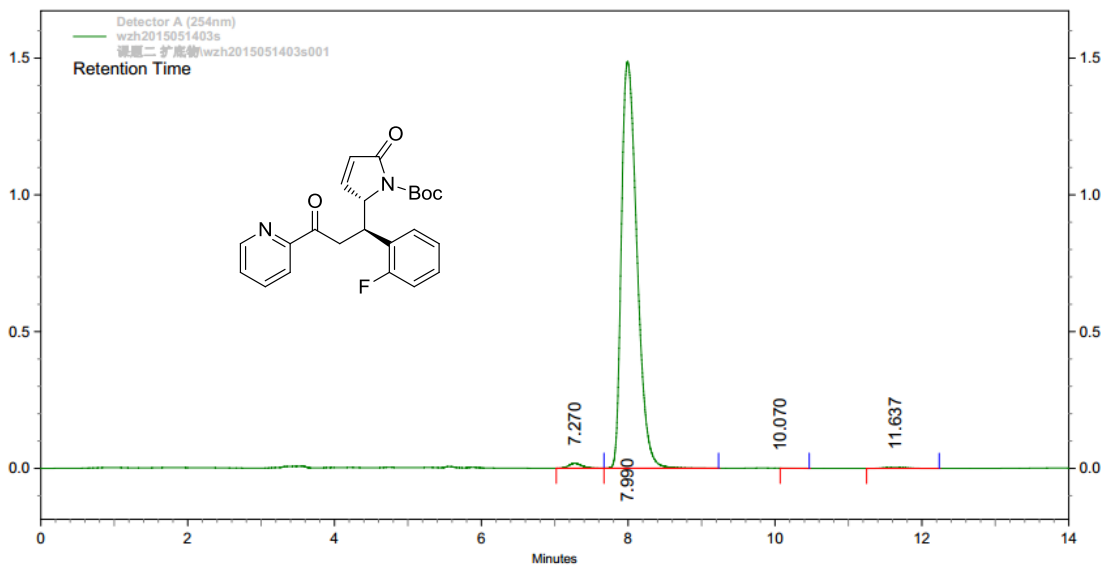

Detector  
A  
(254nm)

| Pk # | Retention Time | Height  | Height Percent | Area     | Area Percent |
|------|----------------|---------|----------------|----------|--------------|
| 1    | 7.270          | 18079   | 1.20           | 218254   | 0.99         |
| 2    | 7.990          | 1486950 | 98.56          | 21823731 | 98.69        |
| 3    | 10.070         | 0       | 0.00           | 622      | 0.00         |
| 4    | 11.637         | 3595    | 0.24           | 71071    | 0.32         |

| Totals |  | 1508624 | 100.00 | 22113678 | 100.00 |
|--------|--|---------|--------|----------|--------|
|--------|--|---------|--------|----------|--------|

# <sup>1</sup>H NMR, <sup>13</sup>C NMR and HPLC of 3c

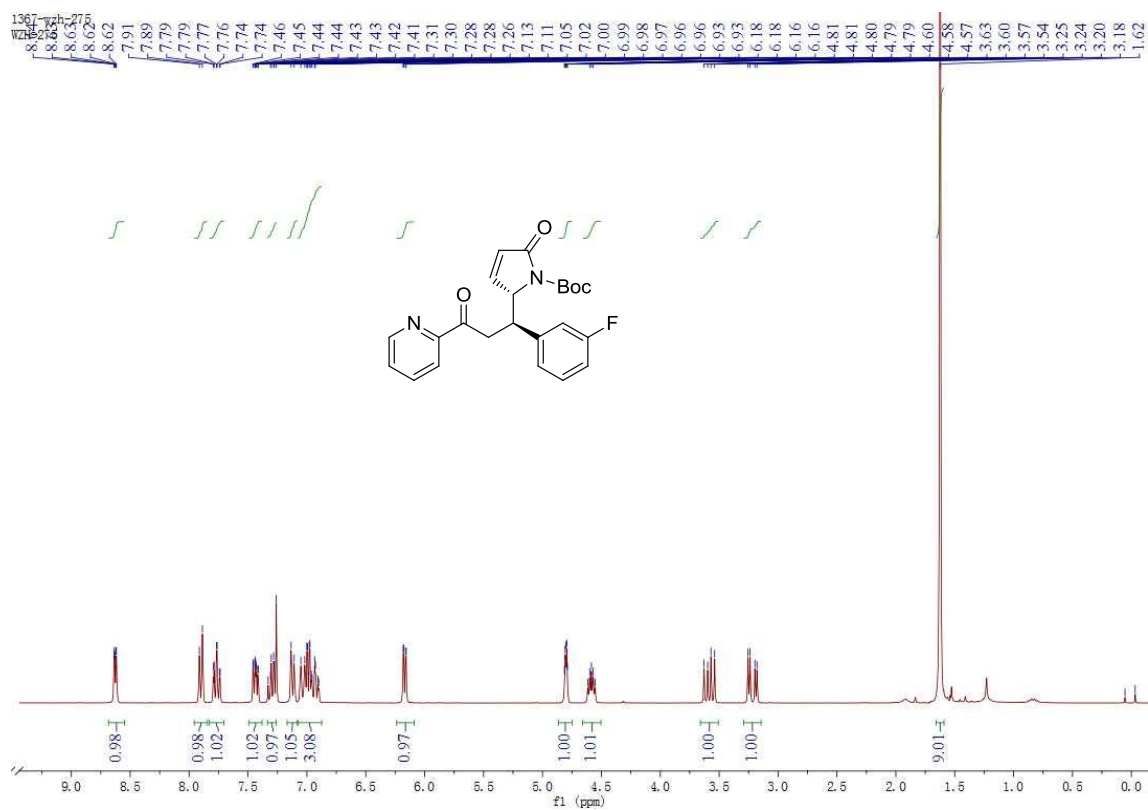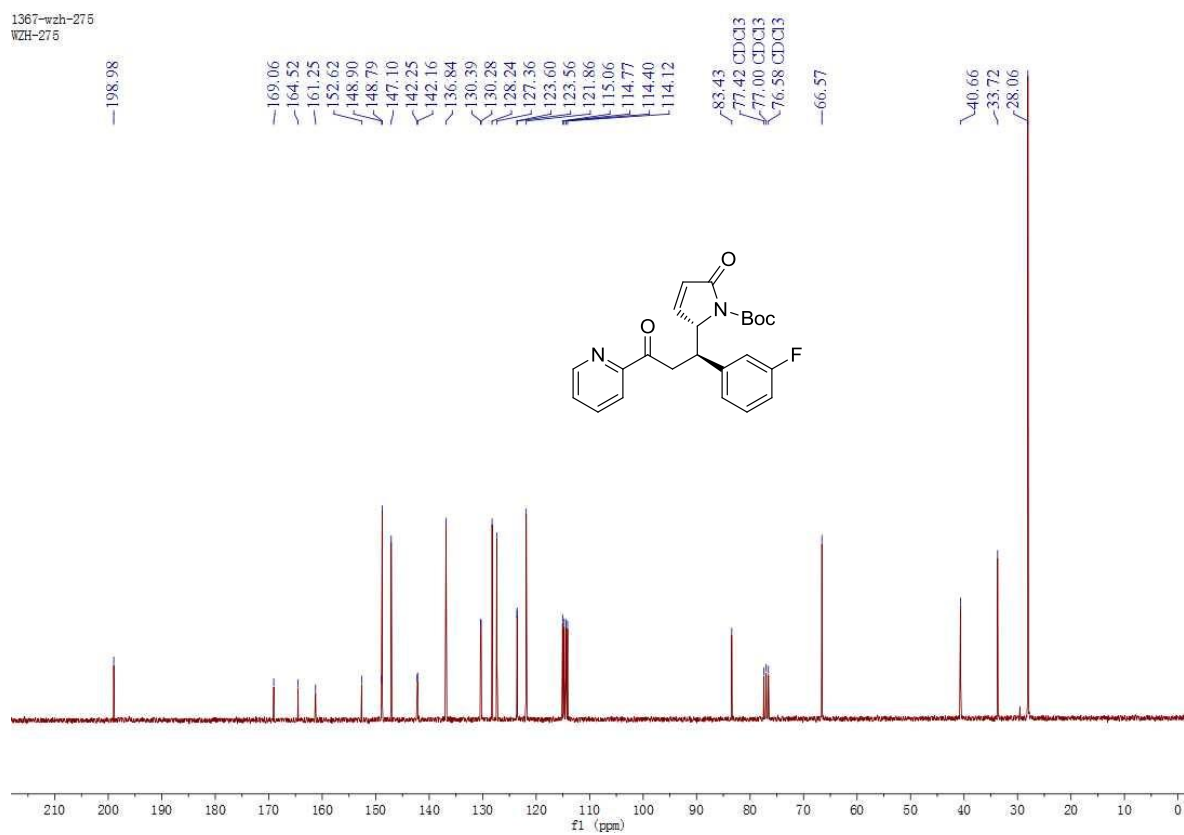

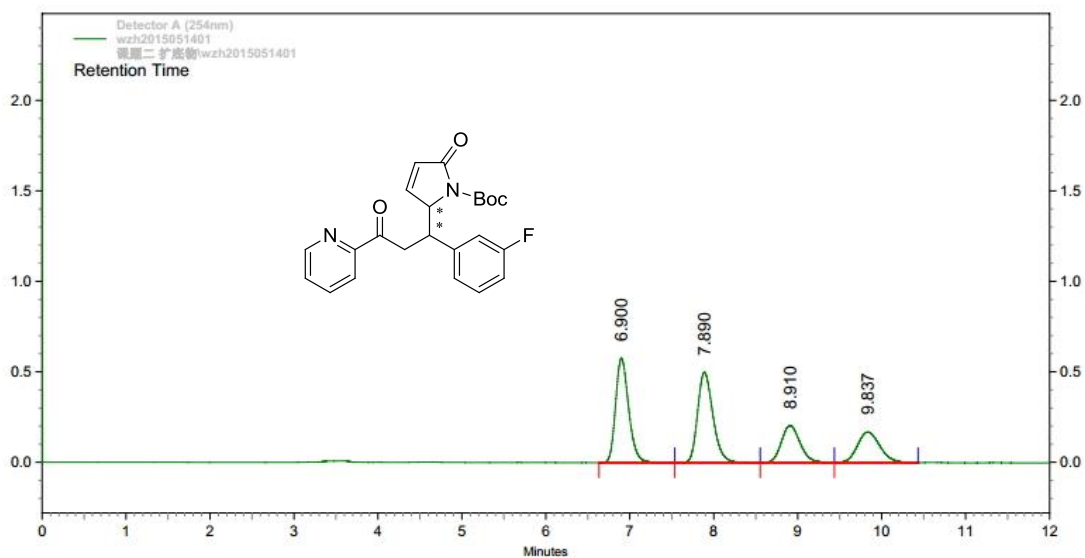

Detector  
A  
(254nm)

| Pk # | Retention Time | Height | Height Percent | Area    | Area Percent |
|------|----------------|--------|----------------|---------|--------------|
| 1    | 6.900          | 576543 | 39.78          | 6239686 | 33.00        |
| 2    | 7.890          | 499172 | 34.44          | 6328172 | 33.46        |
| 3    | 8.910          | 204401 | 14.10          | 3179973 | 16.82        |
| 4    | 9.837          | 169109 | 11.67          | 3162919 | 16.73        |

| Totals | Height  | Area     |
|--------|---------|----------|
|        | 1449225 | 18910750 |

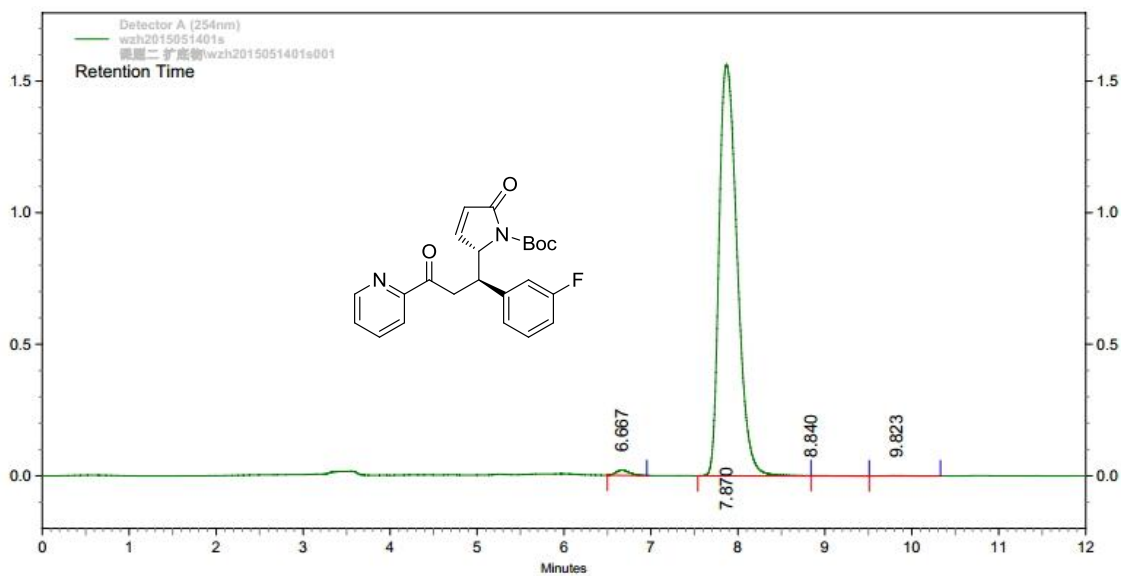

Detector  
A  
(254nm)

| Pk # | Retention Time | Height  | Height Percent | Area     | Area Percent |
|------|----------------|---------|----------------|----------|--------------|
| 1    | 6.667          | 19973   | 1.26           | 212389   | 0.93         |
| 2    | 7.870          | 1562741 | 98.65          | 22524536 | 98.97        |
| 3    | 8.840          | 618     | 0.04           | 9808     | 0.04         |
| 4    | 9.823          | 810     | 0.05           | 12874    | 0.06         |

| Totals | Height  | Area     |
|--------|---------|----------|
|        | 1584142 | 22759607 |



# <sup>1</sup>H NMR, <sup>13</sup>C NMR and HPLC of 3d

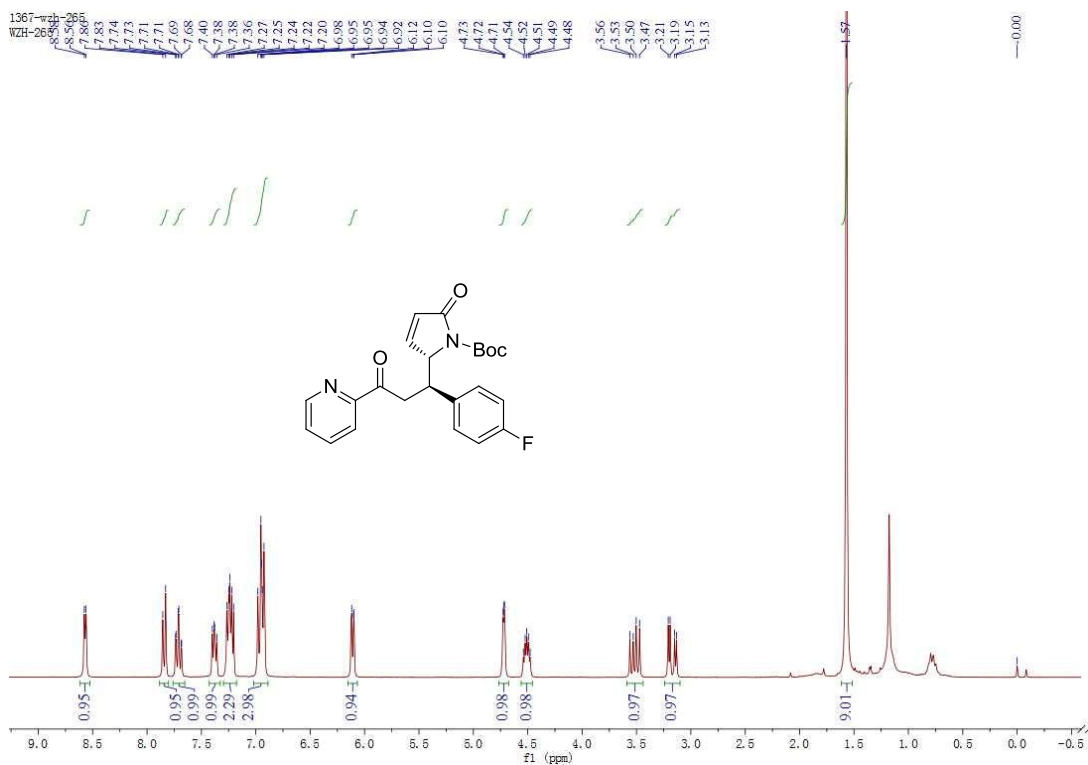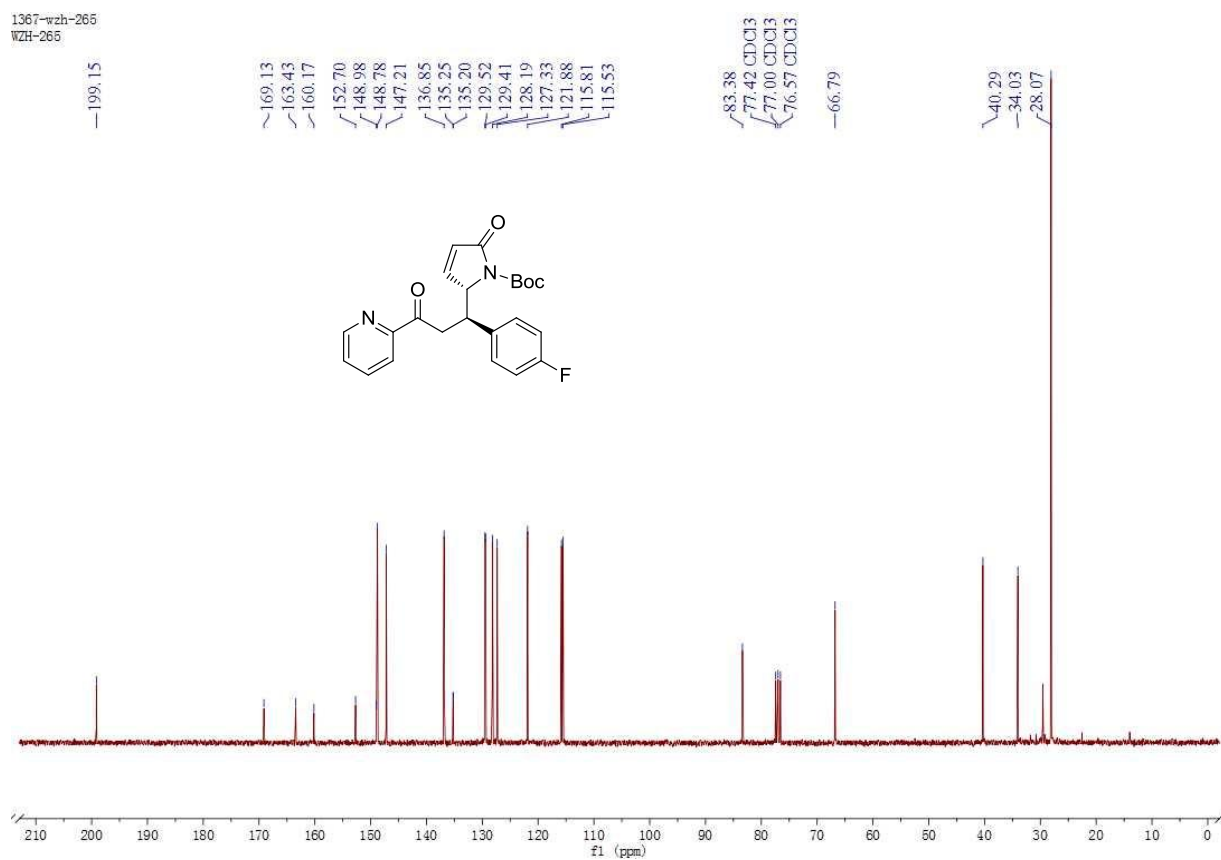

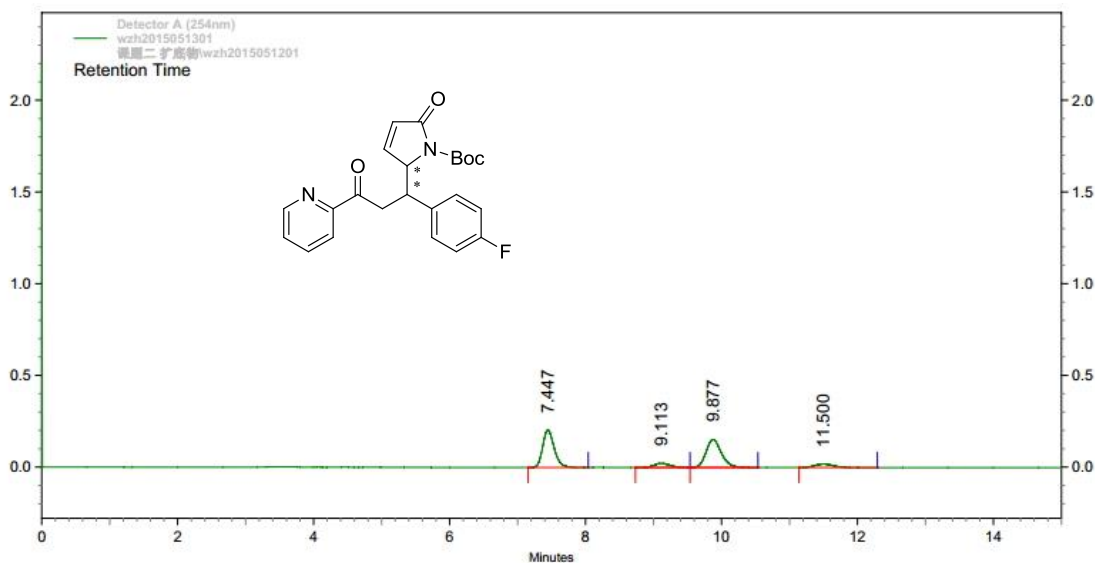

Detector  
A  
(254nm)

| Pk # | Retention Time | Height | Height Percent | Area    | Area Percent |
|------|----------------|--------|----------------|---------|--------------|
| 1    | 7.447          | 204290 | 51.22          | 2404223 | 43.56        |
| 2    | 9.113          | 23229  | 5.82           | 372556  | 6.75         |
| 3    | 9.877          | 152455 | 38.23          | 2382373 | 43.17        |
| 4    | 11.500         | 18852  | 4.73           | 359629  | 6.52         |

| Totals |  | 398826 | 100.00 | 5518781 | 100.00 |
|--------|--|--------|--------|---------|--------|
|--------|--|--------|--------|---------|--------|

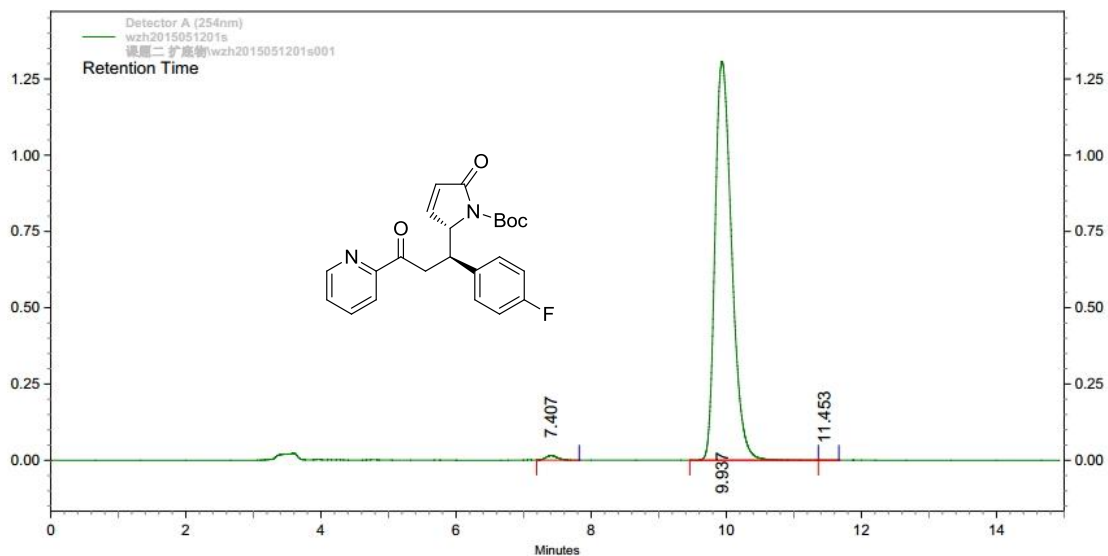

Detector  
A  
(254nm)

| Pk # | Retention Time | Height  | Height Percent | Area     | Area Percent |
|------|----------------|---------|----------------|----------|--------------|
| 1    | 7.407          | 14989   | 1.13           | 180120   | 0.80         |
| 2    | 9.937          | 1306886 | 98.86          | 22359395 | 99.20        |
| 3    | 11.453         | 92      | 0.01           | 1076     | 0.00         |

| Totals |  | 1321967 | 100.00 | 22540591 | 100.00 |
|--------|--|---------|--------|----------|--------|
|--------|--|---------|--------|----------|--------|

# <sup>1</sup>H NMR, <sup>13</sup>C NMR and HPLC of 3e

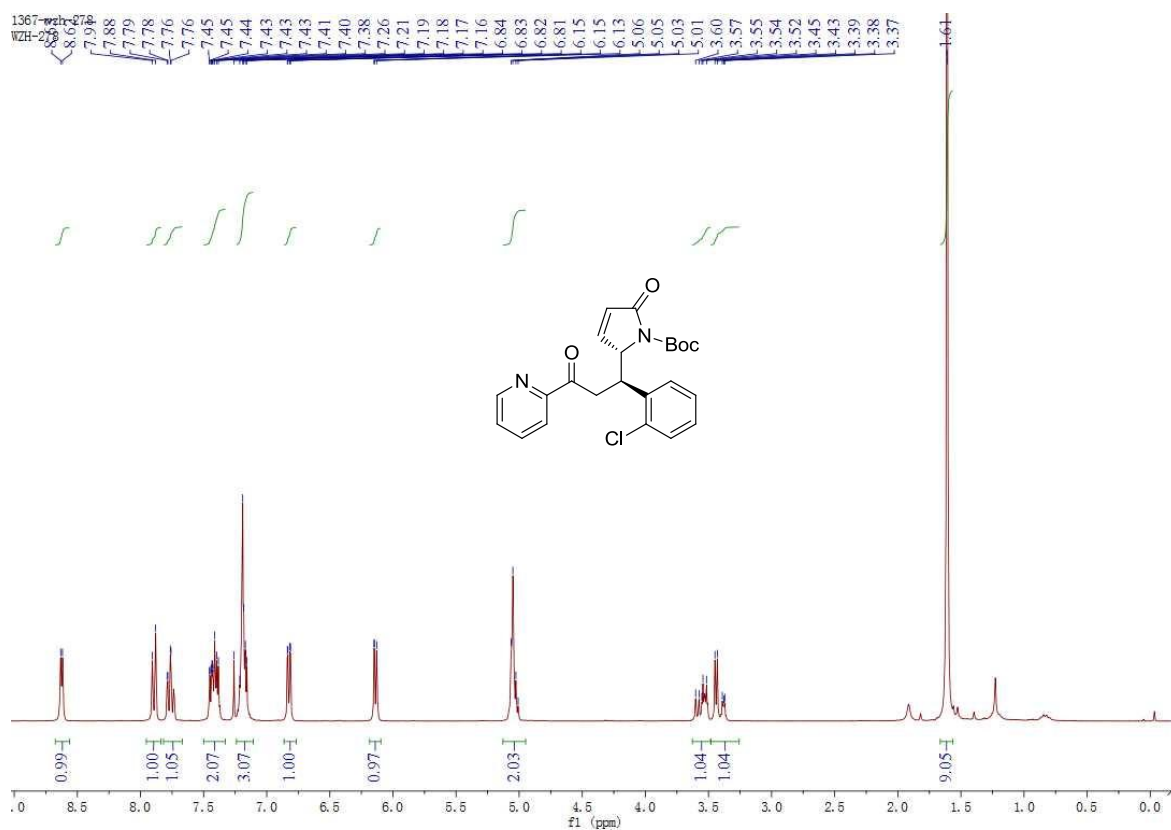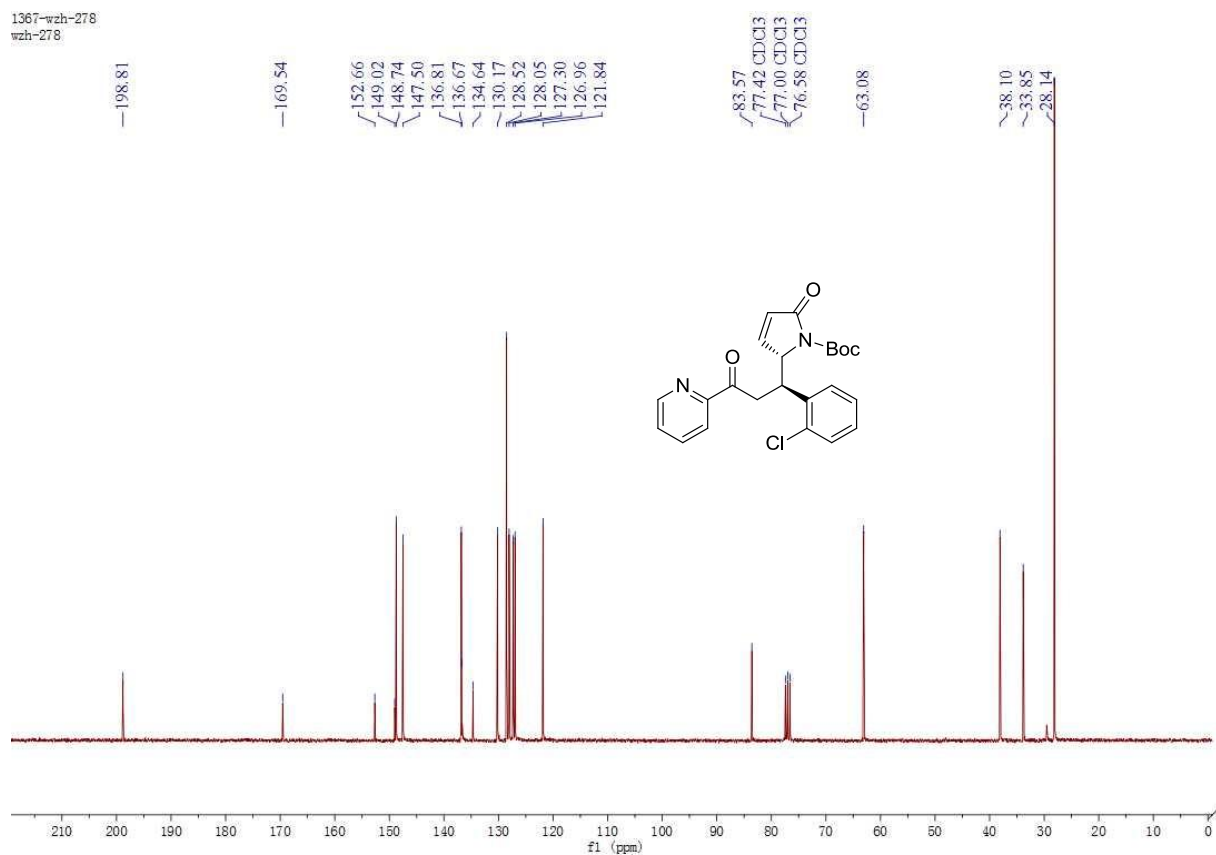

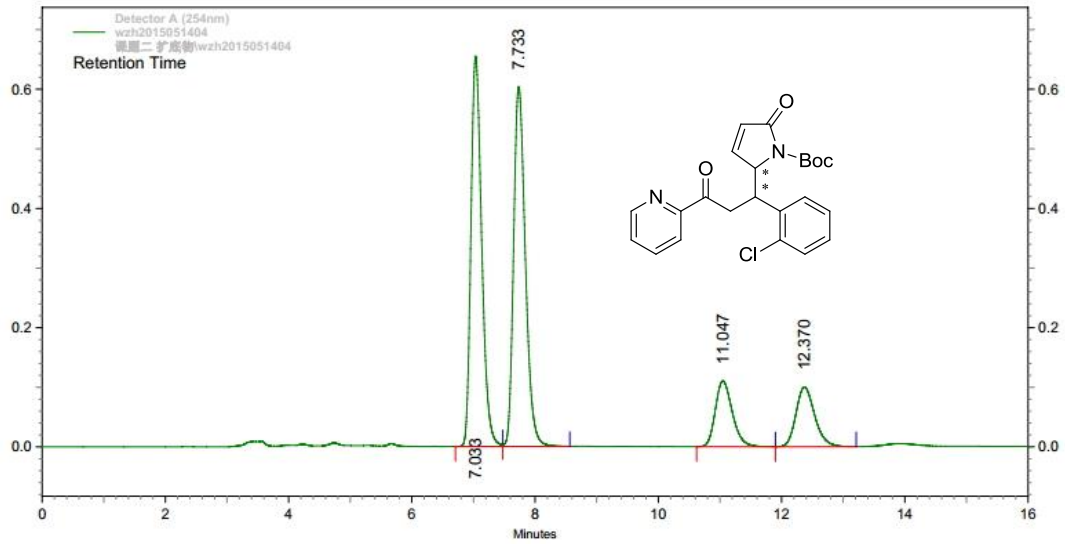

Detector  
A  
(254nm)

| Pk # | Retention Time | Height | Height Percent | Area    | Area Percent |
|------|----------------|--------|----------------|---------|--------------|
| 1    | 7.033          | 654650 | 44.57          | 7927210 | 39.37        |
| 2    | 7.733          | 603751 | 41.10          | 7976260 | 39.62        |
| 3    | 11.047         | 110376 | 7.51           | 2113577 | 10.50        |
| 4    | 12.370         | 100071 | 6.81           | 2115751 | 10.51        |

| Totals | Height  | Area     |
|--------|---------|----------|
|        | 1468848 | 20132798 |

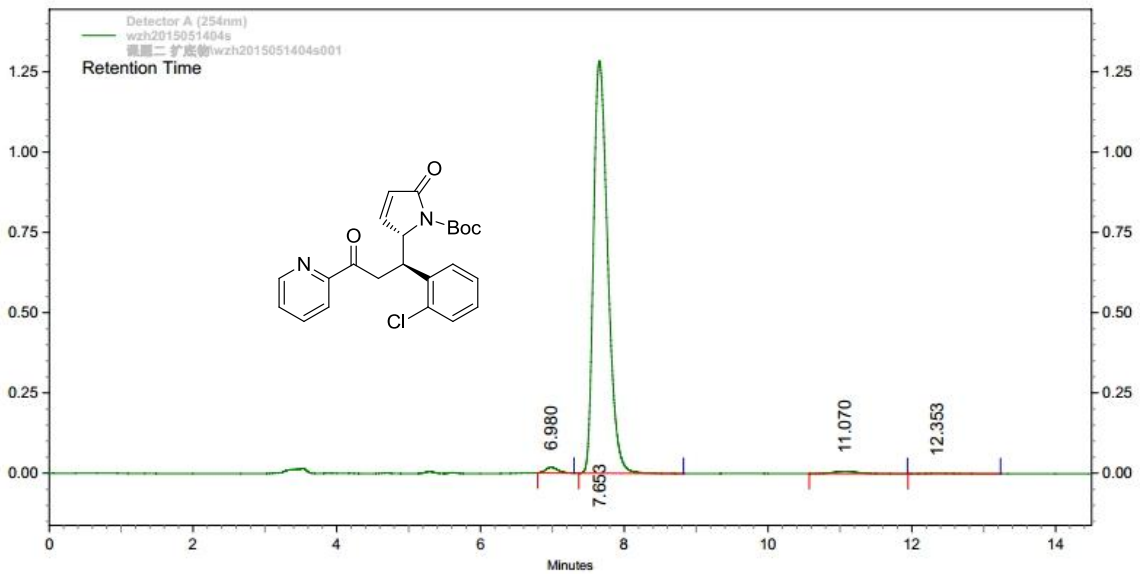

Detector  
A  
(254nm)

| Pk # | Retention Time | Height  | Height Percent | Area     | Area Percent |
|------|----------------|---------|----------------|----------|--------------|
| 1    | 6.980          | 18031   | 1.38           | 210891   | 1.17         |
| 2    | 7.653          | 1284123 | 98.03          | 17616069 | 97.78        |
| 3    | 11.070         | 6476    | 0.49           | 156782   | 0.87         |
| 4    | 12.353         | 1243    | 0.09           | 31613    | 0.18         |

| Totals | Height  | Area     |
|--------|---------|----------|
|        | 1309873 | 18015355 |

# <sup>1</sup>H NMR, <sup>13</sup>C NMR and HPLC of 3f

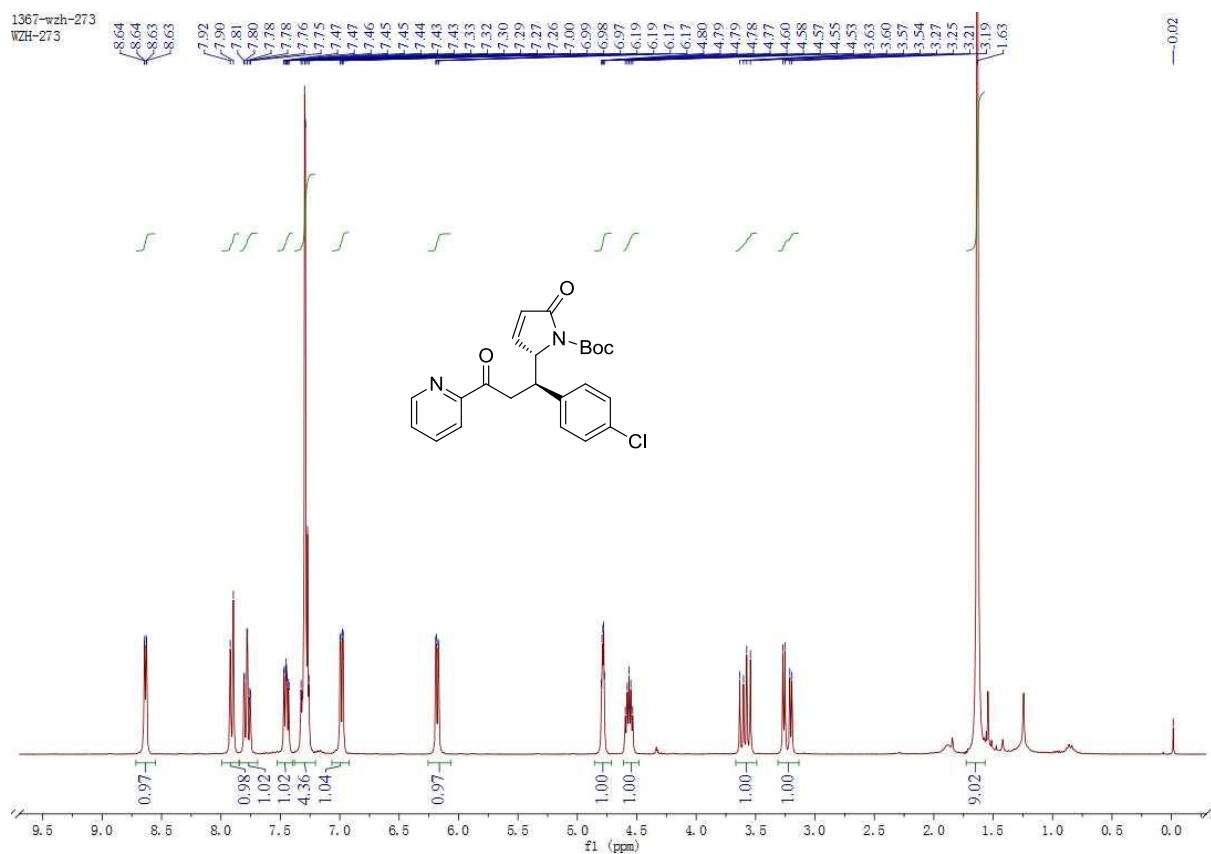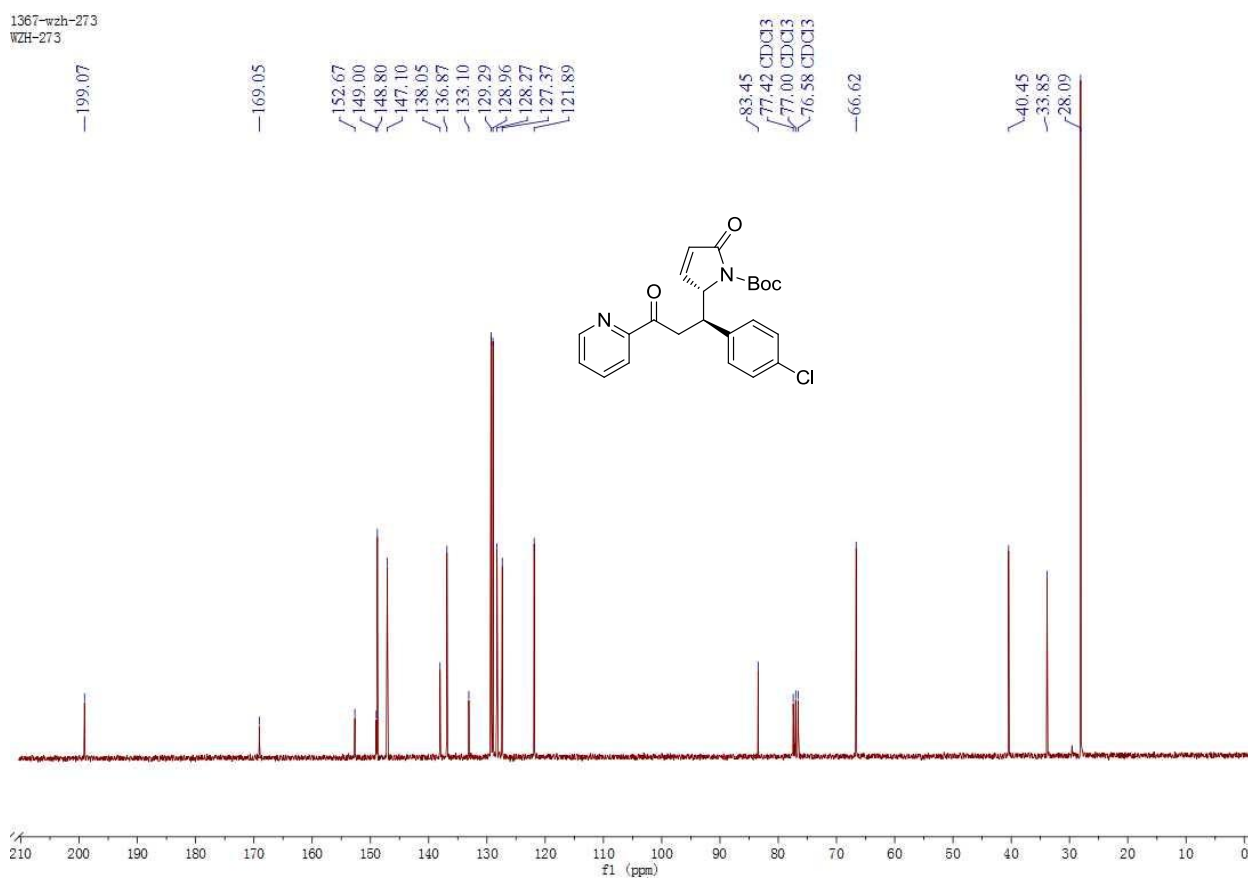

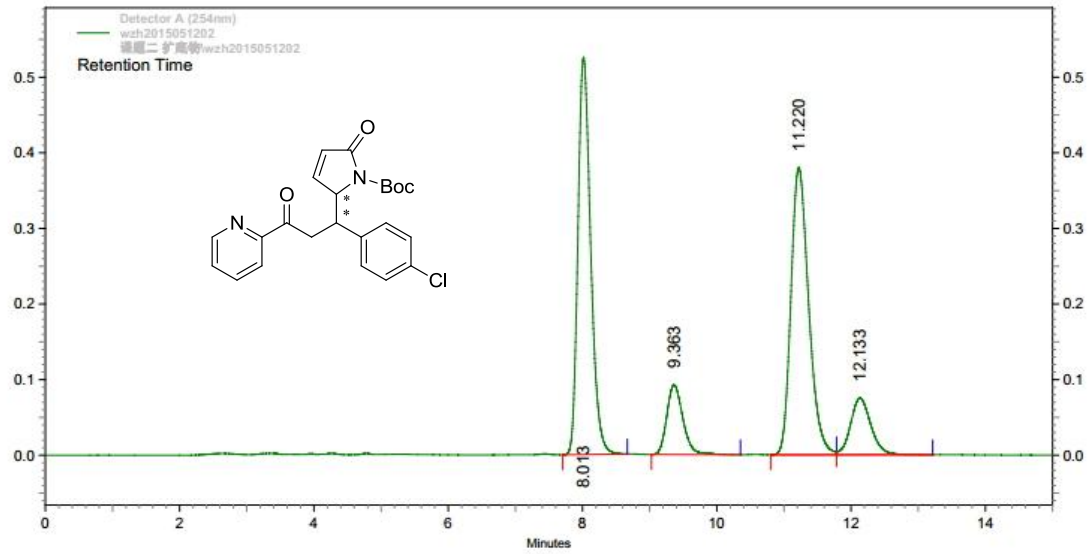

Detector A (254nm)

| Pk # | Retention Time | Height | Height Percent | Area    | Area Percent |
|------|----------------|--------|----------------|---------|--------------|
| 1    | 8.013          | 525165 | 48.99          | 6919489 | 40.71        |
| 2    | 9.363          | 92304  | 8.61           | 1543888 | 9.08         |
| 3    | 11.220         | 379604 | 35.41          | 6962497 | 40.96        |
| 4    | 12.133         | 74914  | 6.99           | 1571017 | 9.24         |

| Totals | Height  | Height Percent | Area     | Area Percent |
|--------|---------|----------------|----------|--------------|
|        | 1071987 | 100.00         | 16996891 | 100.00       |

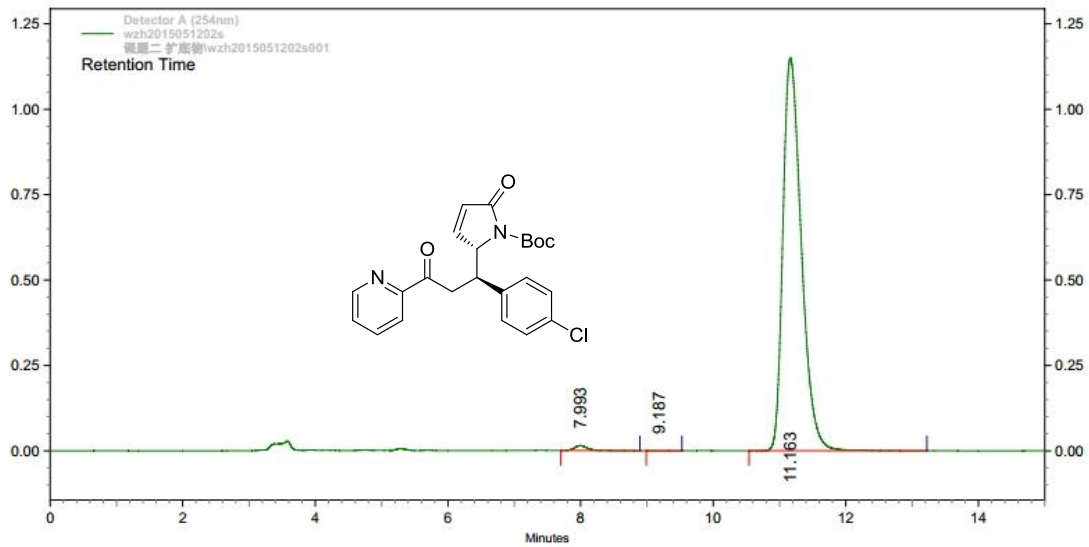

Detector A (254nm)

| Pk # | Retention Time | Height  | Height Percent | Area     | Area Percent |
|------|----------------|---------|----------------|----------|--------------|
| 1    | 7.993          | 14546   | 1.25           | 192069   | 0.86         |
| 2    | 9.187          | 39      | 0.00           | 694      | 0.00         |
| 3    | 11.163         | 1149934 | 98.75          | 22214482 | 99.14        |

| Totals | Height  | Height Percent | Area     | Area Percent |
|--------|---------|----------------|----------|--------------|
|        | 1164519 | 100.00         | 22407245 | 100.00       |

# <sup>1</sup>H NMR, <sup>13</sup>C NMR and HPLC of 3g

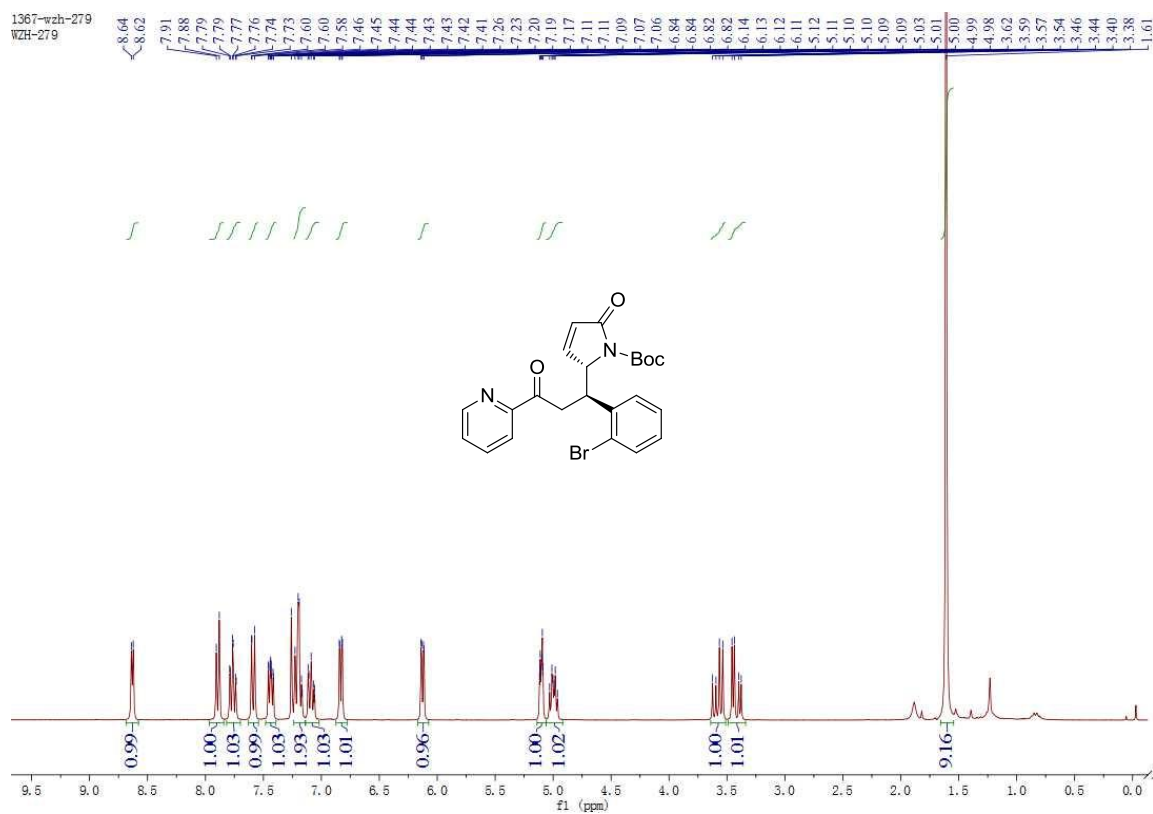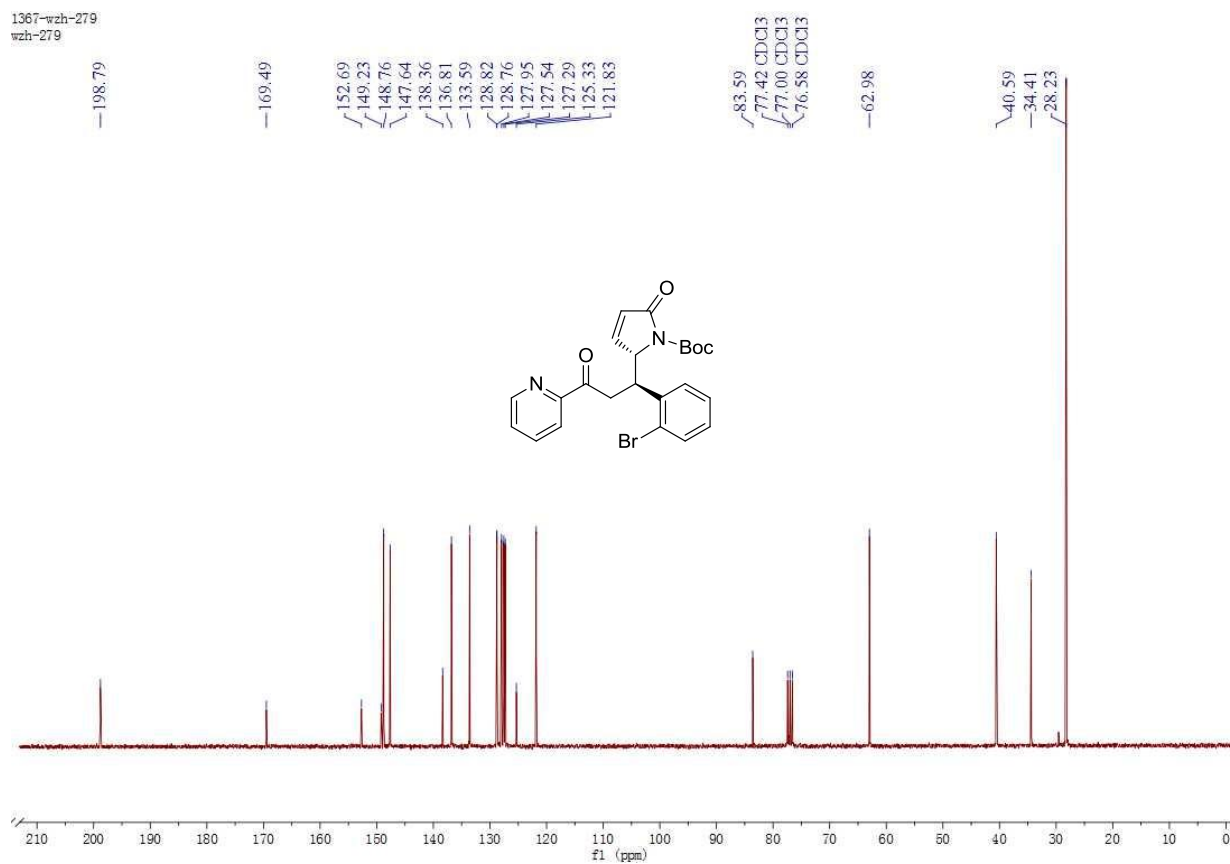

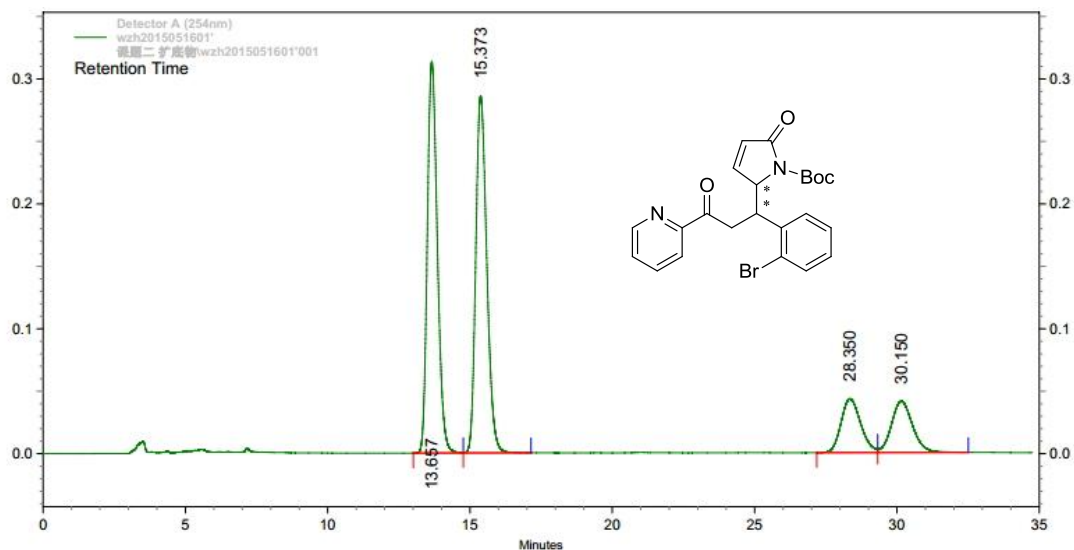

Detector  
A  
(254nm)

| Pk # | Retention Time | Height | Height Percent | Area    | Area Percent |
|------|----------------|--------|----------------|---------|--------------|
| 1    | 13.657         | 313185 | 45.83          | 7646386 | 39.21        |
| 2    | 15.373         | 285893 | 41.84          | 7672613 | 39.35        |
| 3    | 28.350         | 43129  | 6.31           | 2059919 | 10.56        |
| 4    | 30.150         | 41091  | 6.01           | 2121297 | 10.88        |

| Totals | Height | Area     |
|--------|--------|----------|
|        | 683298 | 19500215 |

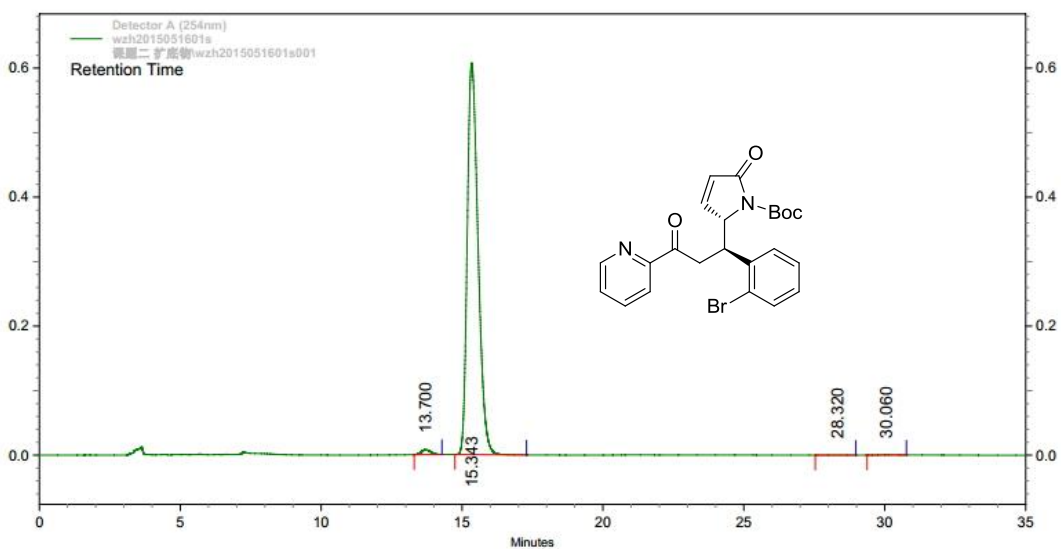

Detector  
A  
(254nm)

| Pk # | Retention Time | Height | Height Percent | Area     | Area Percent |
|------|----------------|--------|----------------|----------|--------------|
| 1    | 13.700         | 7509   | 1.22           | 173730   | 1.06         |
| 2    | 15.343         | 607113 | 98.72          | 16148732 | 98.84        |
| 3    | 28.320         | 39     | 0.01           | 1611     | 0.01         |
| 4    | 30.060         | 352    | 0.06           | 14365    | 0.09         |

| Totals | Height | Area     |
|--------|--------|----------|
|        | 615013 | 16338438 |



# <sup>1</sup>H NMR, <sup>13</sup>C NMR and HPLC of 3g

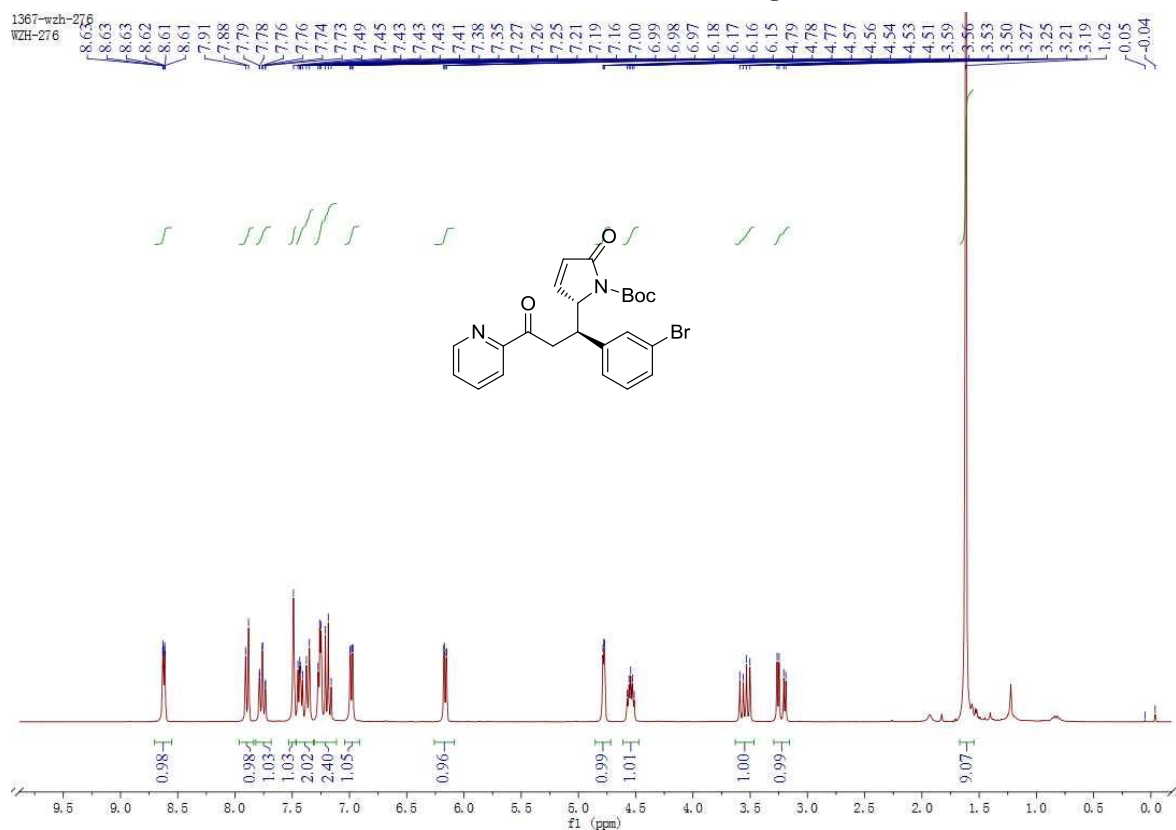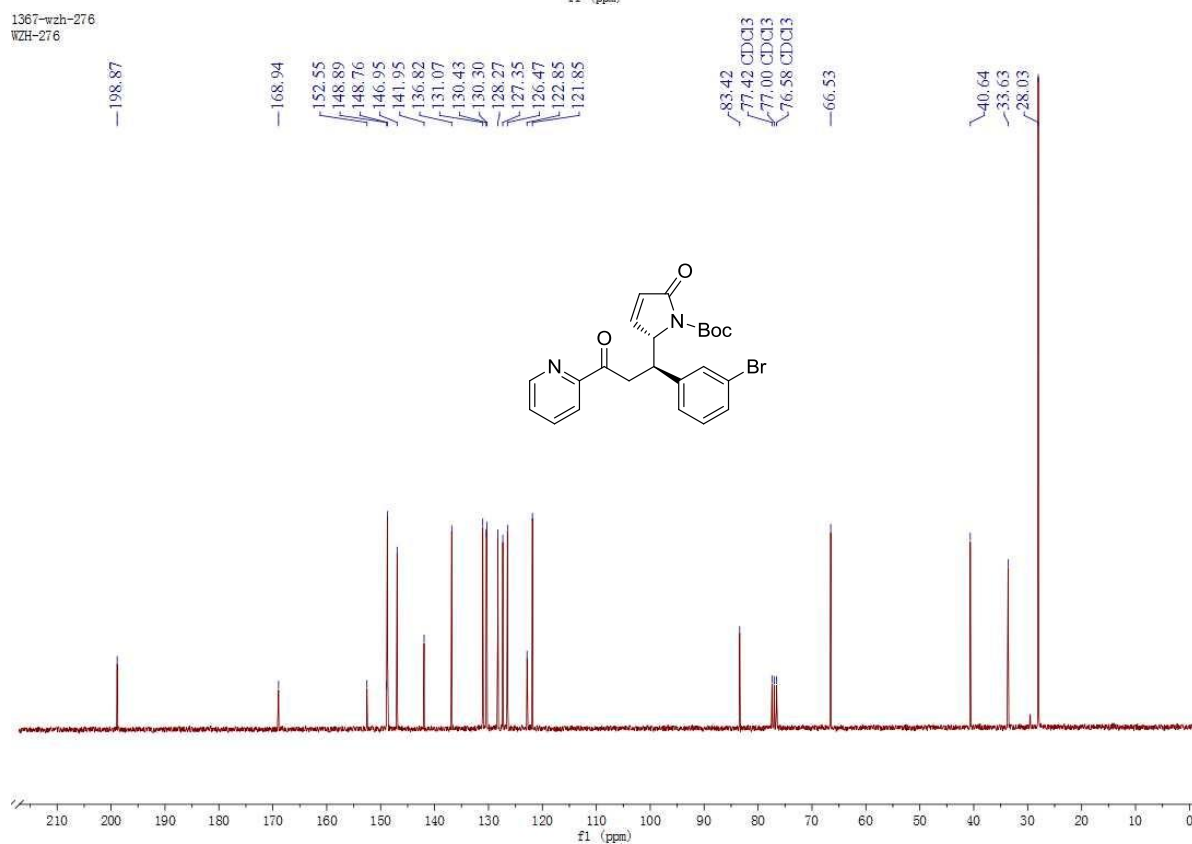

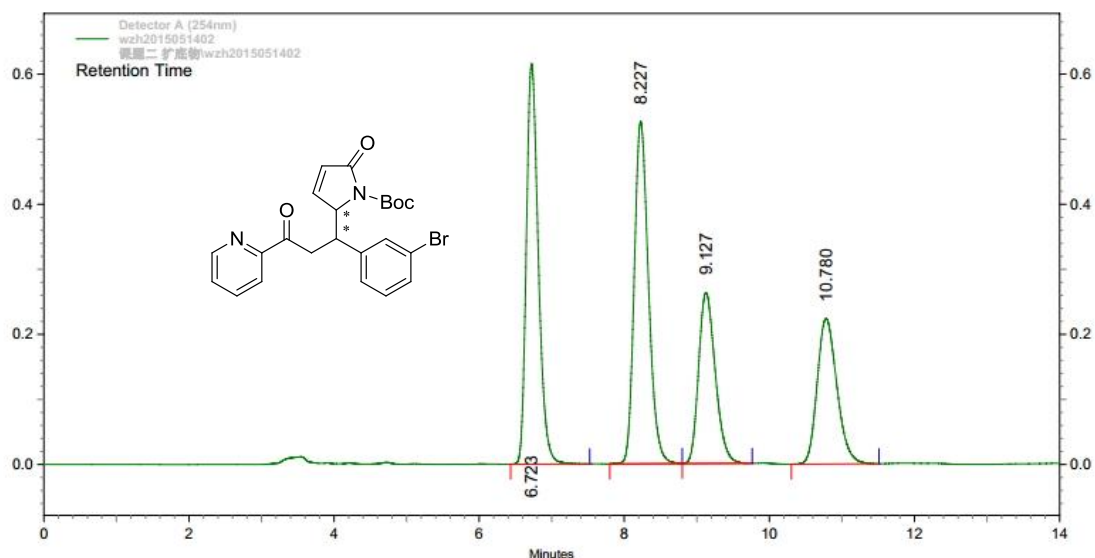

Detector  
A  
(254nm)

| Pk # | Retention Time | Height | Height Percent | Area    | Area Percent |
|------|----------------|--------|----------------|---------|--------------|
| 1    | 6.723          | 615481 | 37.81          | 7060131 | 31.18        |
| 2    | 8.227          | 525953 | 32.31          | 7163135 | 31.63        |
| 3    | 9.127          | 262877 | 16.15          | 4200967 | 18.55        |
| 4    | 10.780         | 223579 | 13.73          | 4220843 | 18.64        |

| Totals | Height  | Area     | Area Percent |
|--------|---------|----------|--------------|
|        | 1627890 | 22645076 | 100.00       |

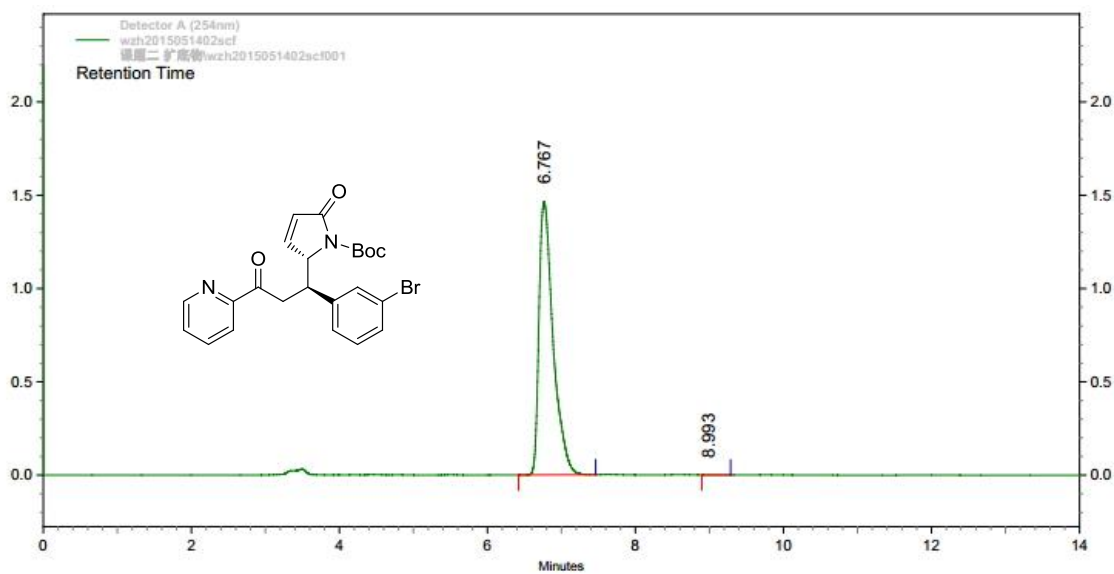

Detector  
A  
(254nm)

| Pk # | Retention Time | Height  | Height Percent | Area     | Area Percent |
|------|----------------|---------|----------------|----------|--------------|
| 1    | 6.767          | 1462803 | 99.99          | 19413273 | 100.00       |
| 2    | 8.993          | 108     | 0.01           | 801      | 0.00         |

| Totals | Height  | Area     | Area Percent |
|--------|---------|----------|--------------|
|        | 1462911 | 19414074 | 100.00       |

# <sup>1</sup>H NMR, <sup>13</sup>C NMR and HPLC of 3i

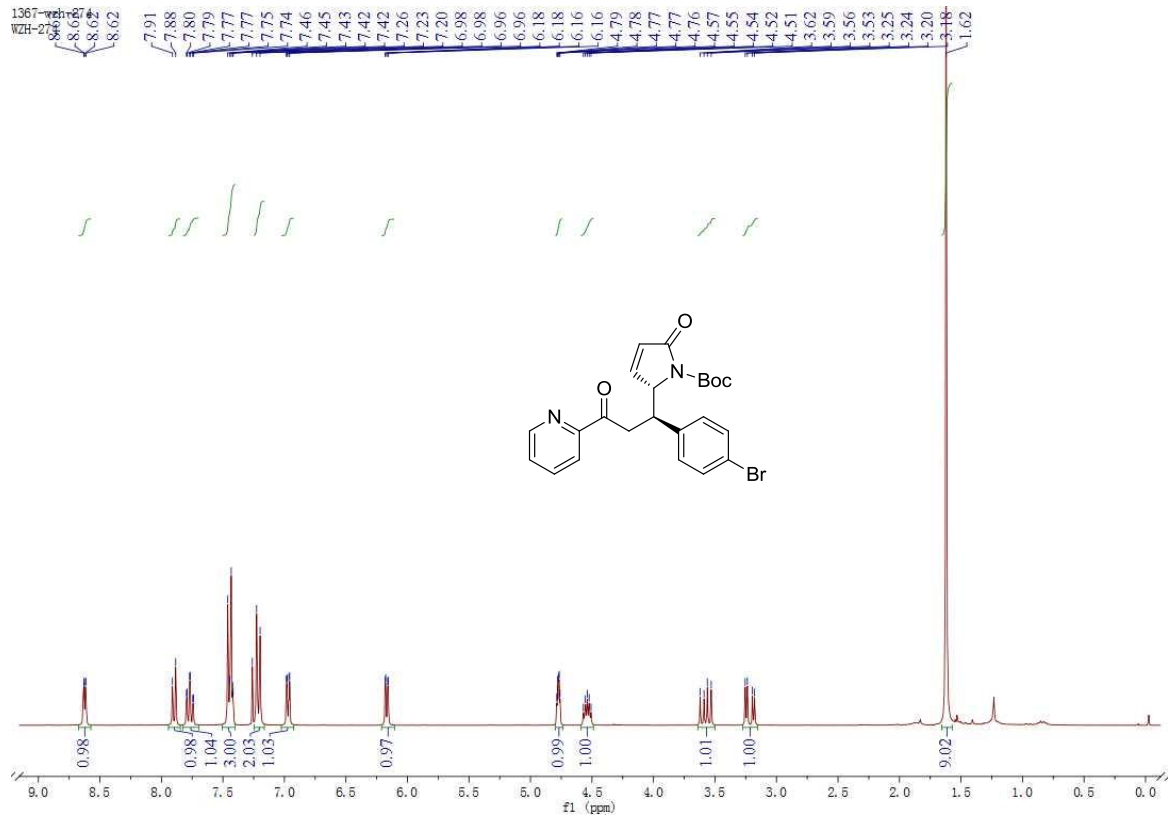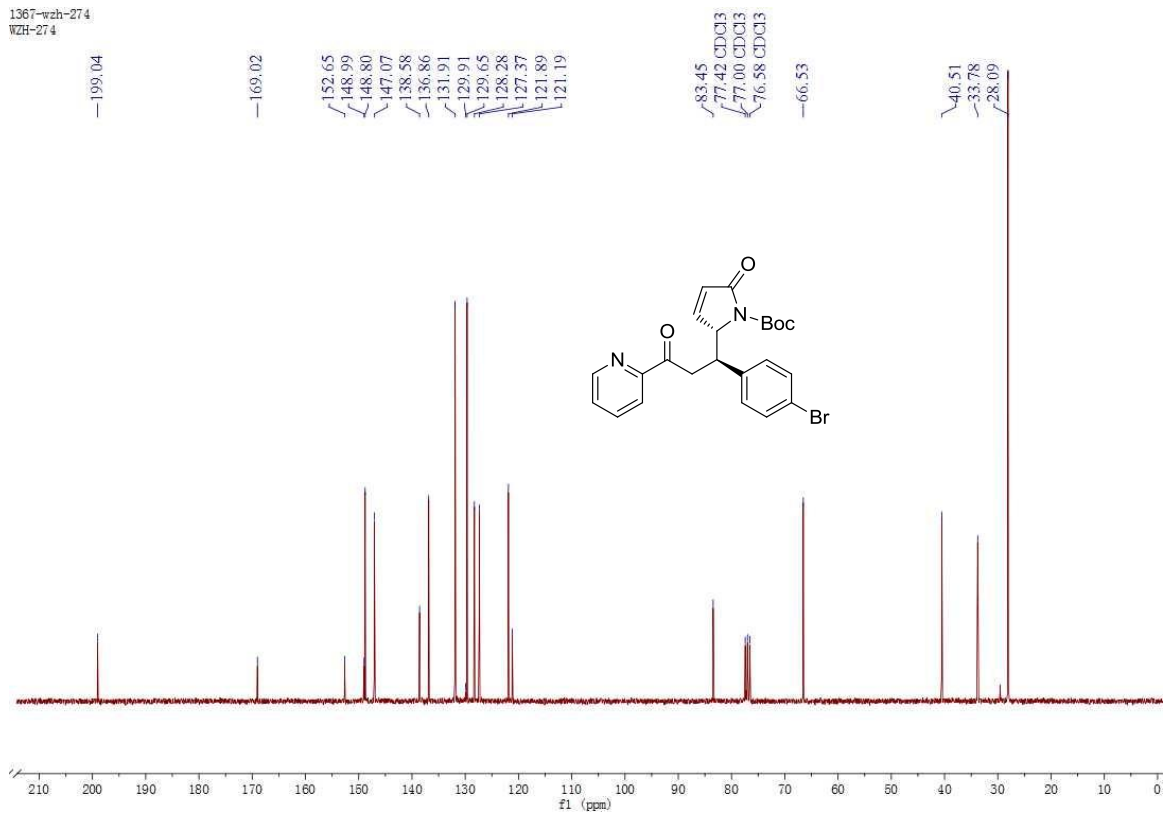

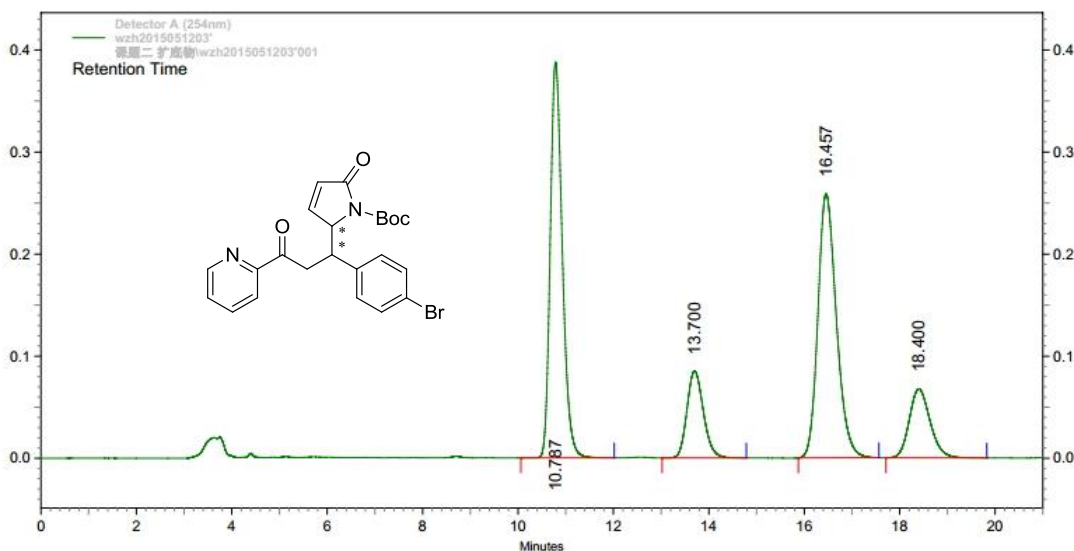

Detector  
A  
(254nm)

| Pk # | Retention Time | Height | Height Percent | Area    | Area Percent |
|------|----------------|--------|----------------|---------|--------------|
| 1    | 10.787         | 387528 | 48.50          | 6792135 | 38.09        |
| 2    | 13.700         | 85158  | 10.66          | 2037524 | 11.43        |
| 3    | 16.457         | 258788 | 32.38          | 6951749 | 38.99        |
| 4    | 18.400         | 67630  | 8.46           | 2049459 | 11.49        |

| Totals |  | 799104 | 100.00 | 17830867 | 100.00 |
|--------|--|--------|--------|----------|--------|
|--------|--|--------|--------|----------|--------|

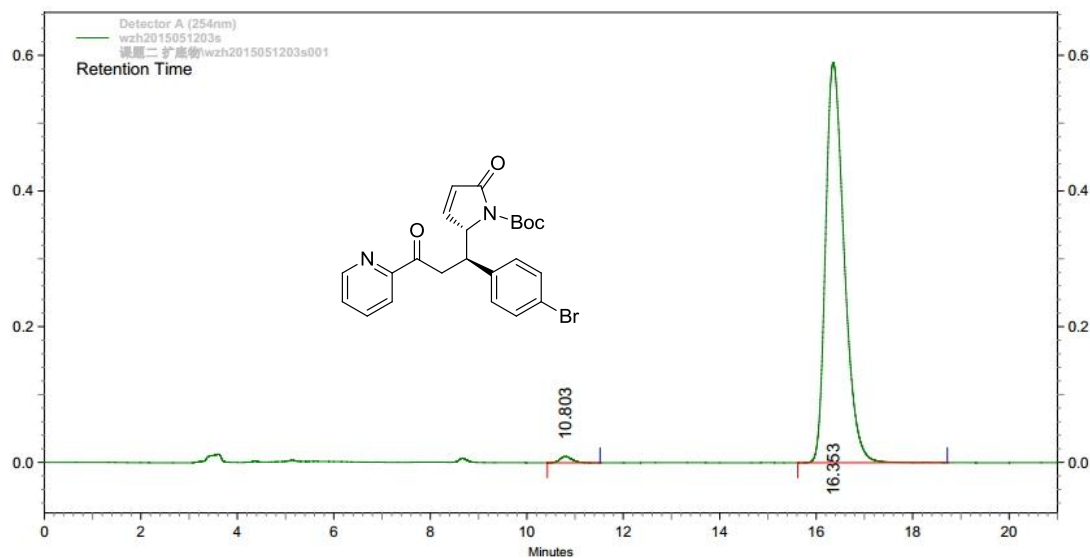

Detector  
A  
(254nm)

| Pk # | Retention Time | Height | Height Percent | Area     | Area Percent |
|------|----------------|--------|----------------|----------|--------------|
| 1    | 10.803         | 9293   | 1.55           | 162931   | 1.02         |
| 2    | 16.353         | 590018 | 98.45          | 15782073 | 98.98        |

| Totals |  | 599311 | 100.00 | 15945004 | 100.00 |
|--------|--|--------|--------|----------|--------|
|--------|--|--------|--------|----------|--------|

# <sup>1</sup>H NMR, <sup>13</sup>C NMR and HPLC of 3j

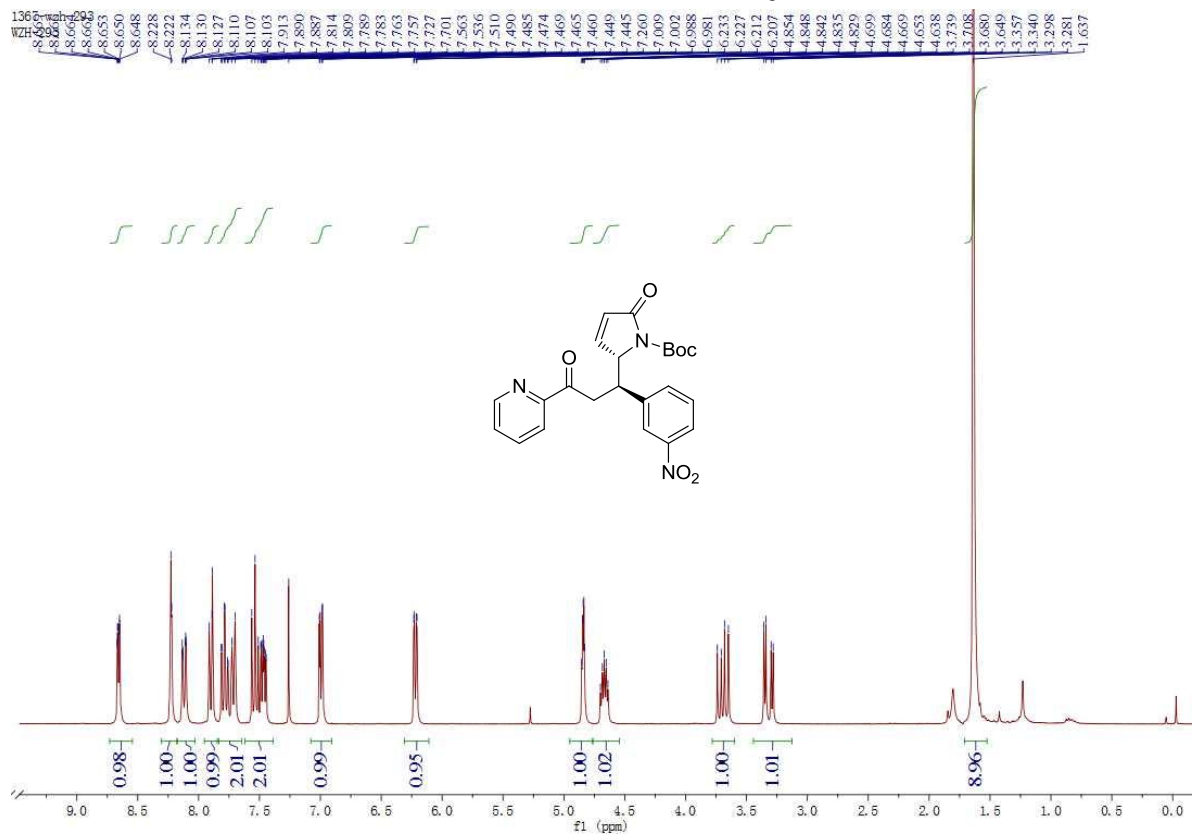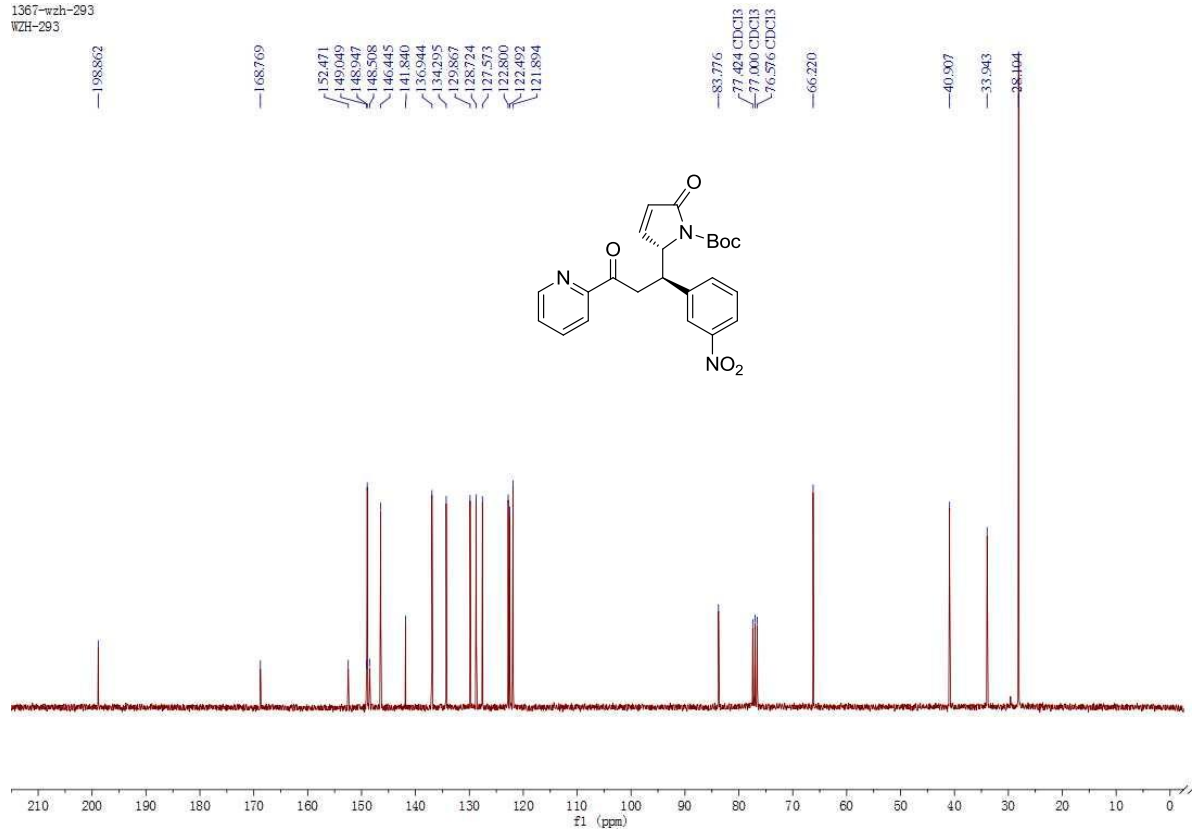

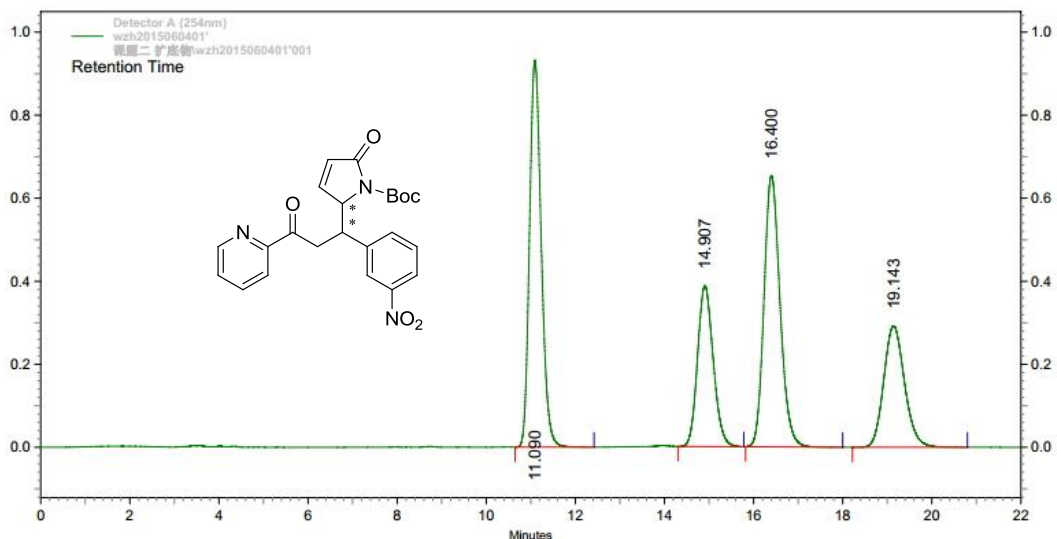

Detector  
A  
(254nm)

| Pk # | Retention Time | Height | Height Percent | Area     | Area Percent |
|------|----------------|--------|----------------|----------|--------------|
| 1    | 11.090         | 932125 | 41.14          | 17024451 | 32.55        |
| 2    | 14.907         | 388009 | 17.12          | 9478691  | 18.12        |
| 3    | 16.400         | 653258 | 28.83          | 16309512 | 31.18        |
| 4    | 19.143         | 292574 | 12.91          | 9494559  | 18.15        |

| Totals |  | 2265966 | 100.00 | 52307213 | 100.00 |
|--------|--|---------|--------|----------|--------|
|--------|--|---------|--------|----------|--------|

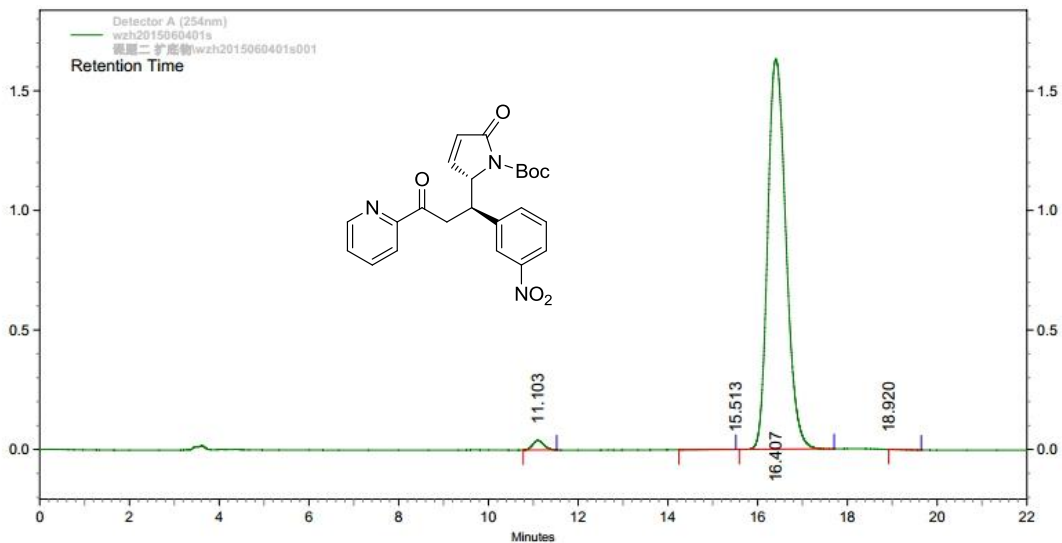

Detector  
A  
(254nm)

| Pk # | Retention Time | Height  | Height Percent | Area     | Area Percent |
|------|----------------|---------|----------------|----------|--------------|
| 1    | 11.103         | 39681   | 2.37           | 681368   | 1.46         |
| 2    | 15.513         | 3       | 0.00           | 12237    | 0.03         |
| 3    | 16.407         | 1631295 | 97.63          | 46016160 | 98.51        |
| 4    | 18.920         | 0       | 0.00           | 570      | 0.00         |

| Totals |  | 1670979 | 100.00 | 46710335 | 100.00 |
|--------|--|---------|--------|----------|--------|
|--------|--|---------|--------|----------|--------|

# <sup>1</sup>H NMR, <sup>13</sup>C NMR and HPLC of 3k

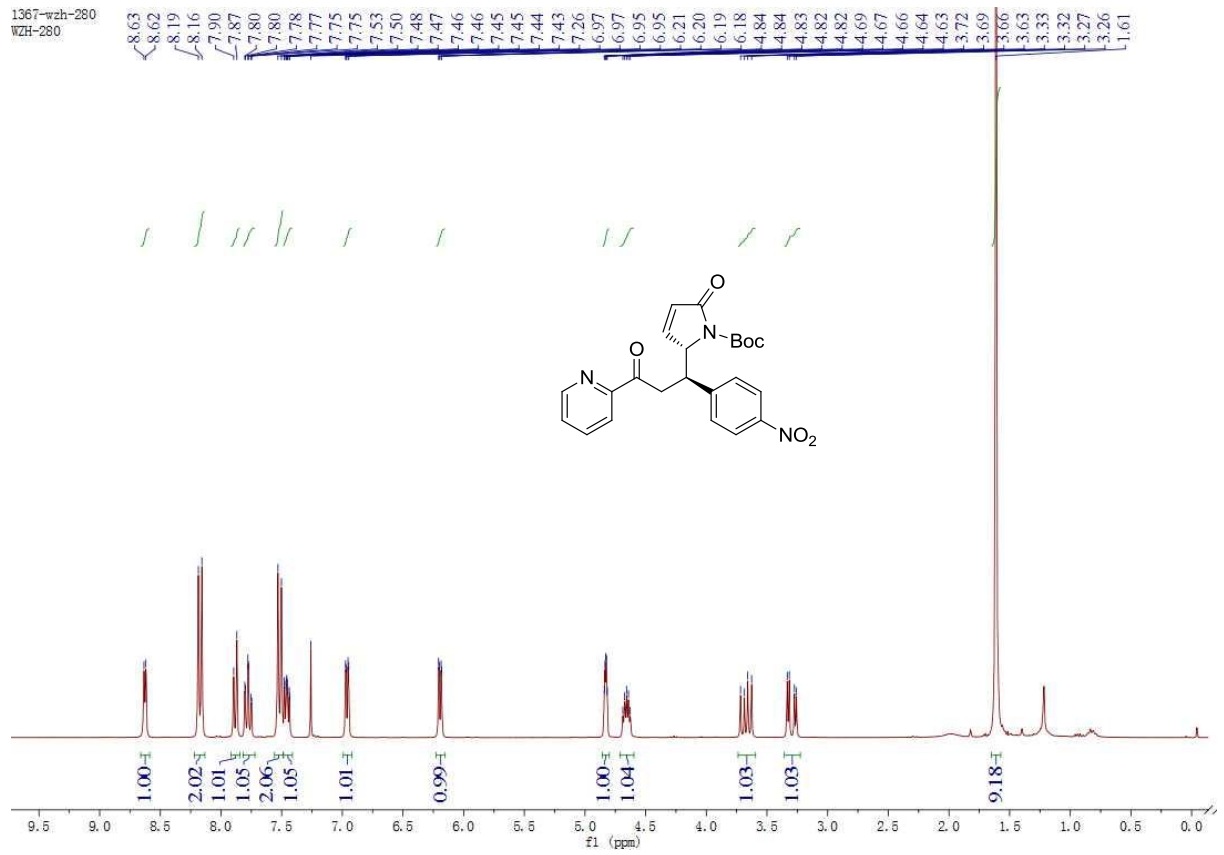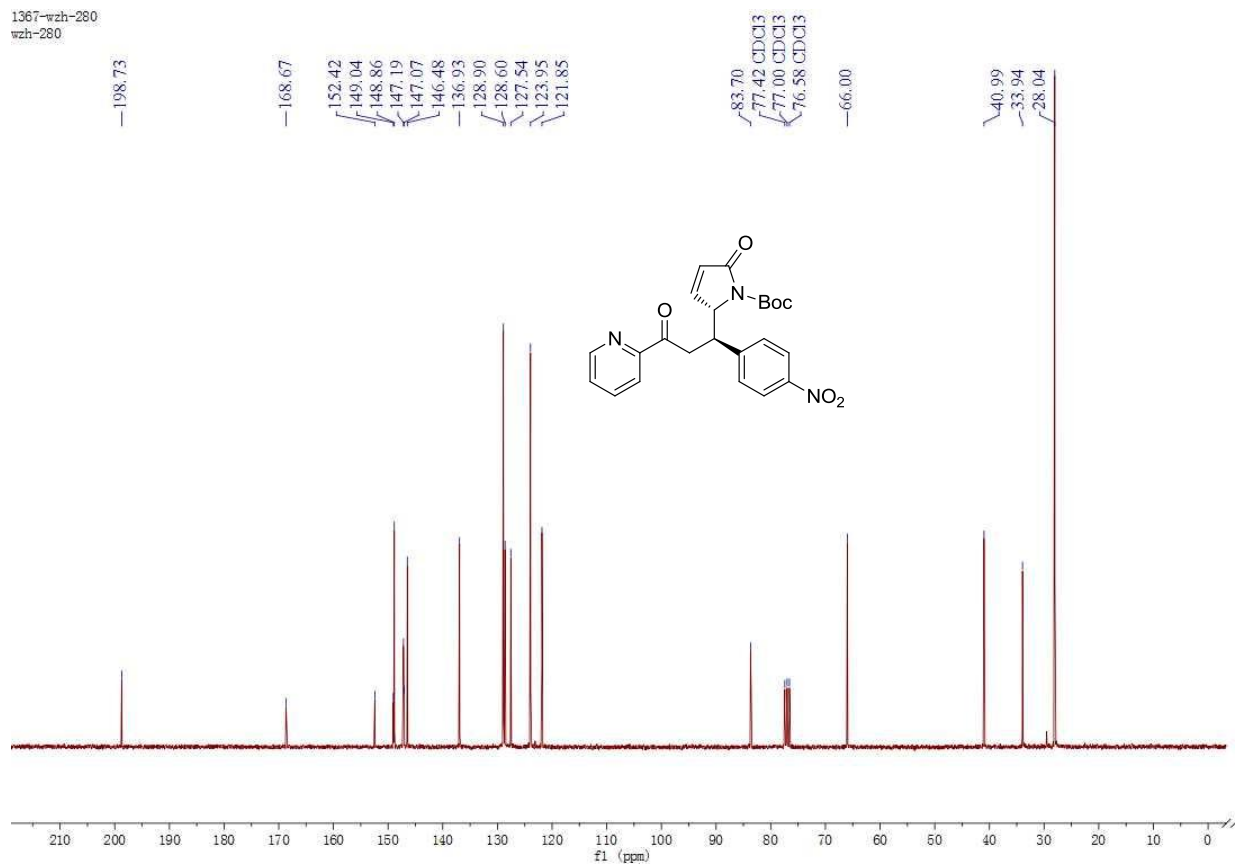

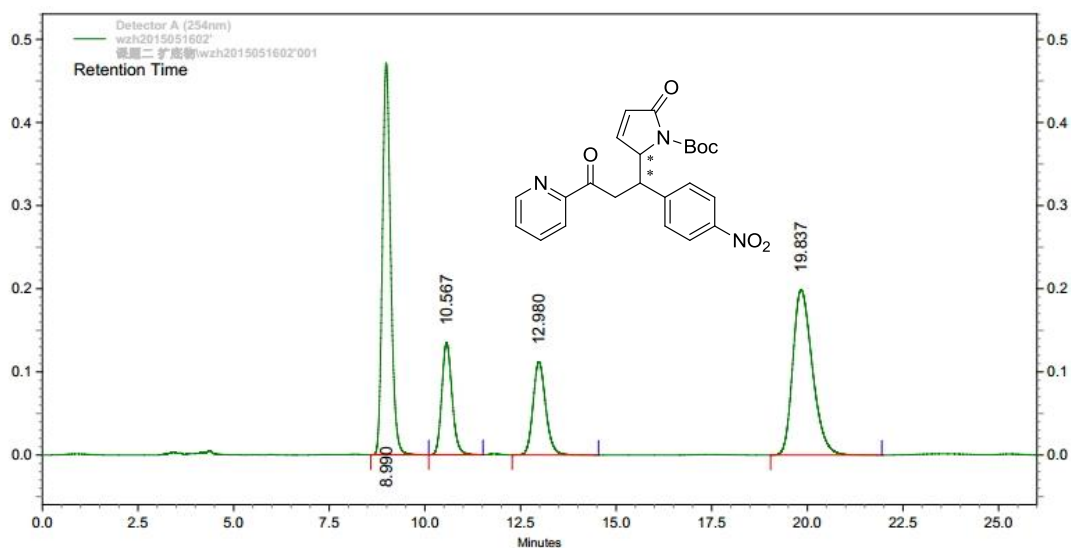

Detector  
A  
(254nm)

| Pk # | Retention Time | Height | Height Percent | Area    | Area Percent |
|------|----------------|--------|----------------|---------|--------------|
| 1    | 8.990          | 471259 | 51.34          | 7072191 | 36.68        |
| 2    | 10.567         | 135201 | 14.73          | 2530481 | 13.12        |
| 3    | 12.980         | 112205 | 12.22          | 2584101 | 13.40        |
| 4    | 19.837         | 199267 | 21.71          | 7093916 | 36.79        |

| Totals |  | 917932 | 100.00 | 19280689 | 100.00 |
|--------|--|--------|--------|----------|--------|
|--------|--|--------|--------|----------|--------|

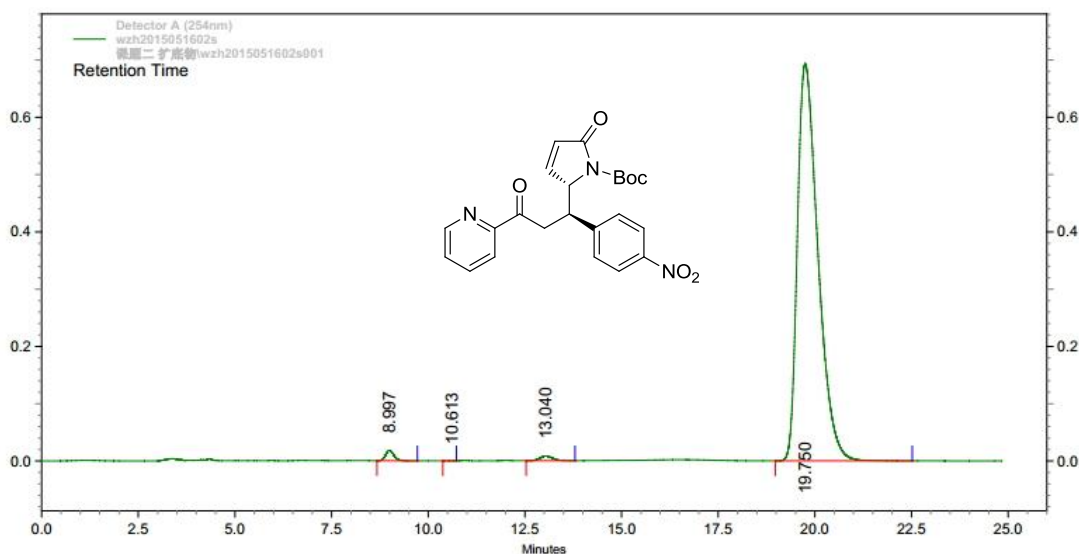

Detector  
A  
(254nm)

| Pk # | Retention Time | Height | Height Percent | Area     | Area Percent |
|------|----------------|--------|----------------|----------|--------------|
| 1    | 8.997          | 18198  | 2.53           | 269772   | 1.04         |
| 2    | 10.613         | 96     | 0.01           | 1186     | 0.00         |
| 3    | 13.040         | 8164   | 1.13           | 187235   | 0.72         |
| 4    | 19.750         | 693476 | 96.32          | 25598553 | 98.24        |

| Totals |  | 719934 | 100.00 | 26056746 | 100.00 |
|--------|--|--------|--------|----------|--------|
|--------|--|--------|--------|----------|--------|



# <sup>1</sup>H NMR, <sup>13</sup>C NMR and HPLC of 31

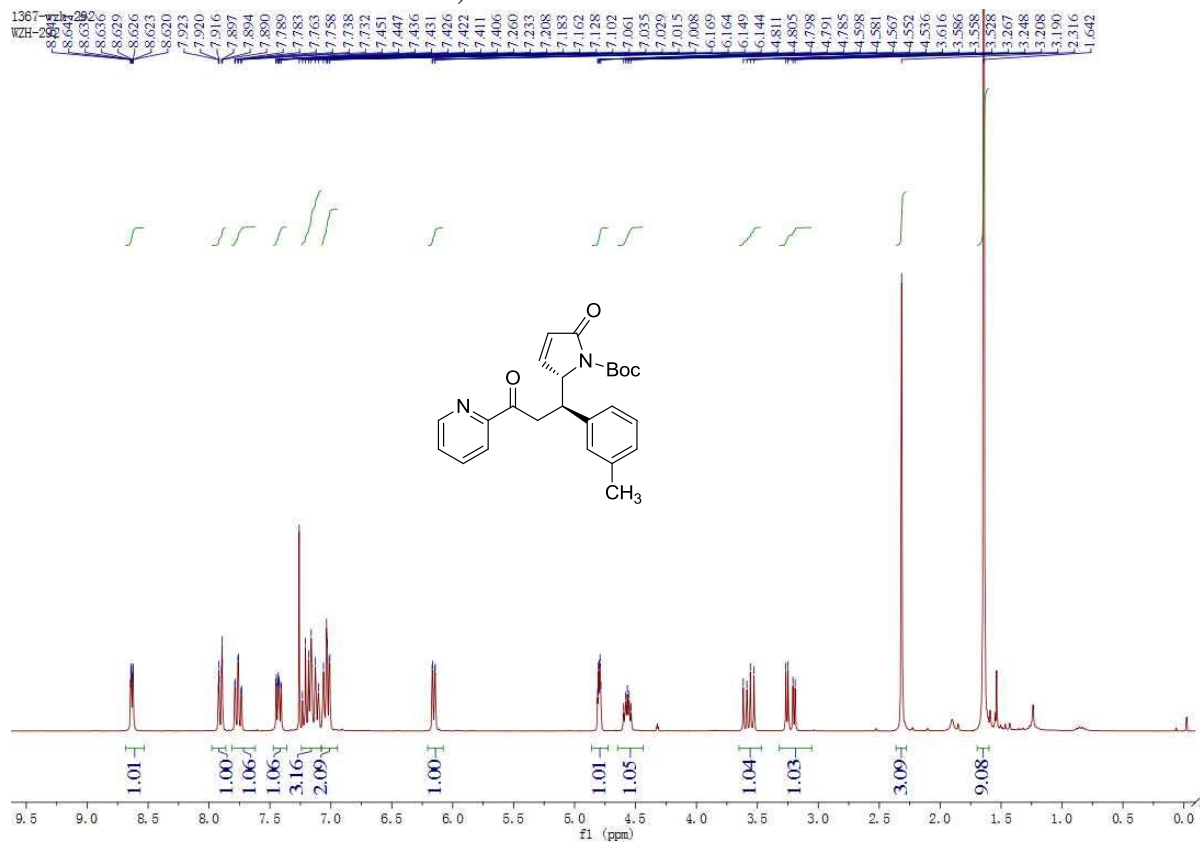

1367-wzh-292  
WZH-292

199.275

169.296

152.809

148.946

148.721

147.644

139.492

138.380

136.783

28.842

28.603

28.016

127.927

127.212

124.752

121.888

83.251

77.424 CDCl<sub>3</sub>

77.000 CDCl<sub>3</sub>

76.576 CDCl<sub>3</sub>

67.013

40.803

33.685

28.461

21.378

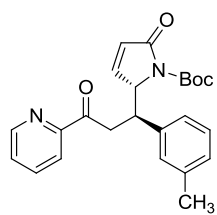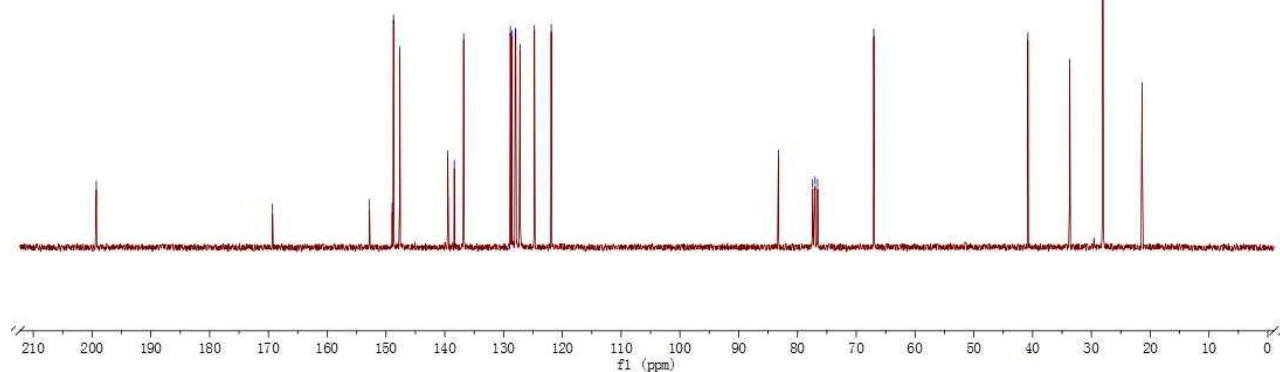

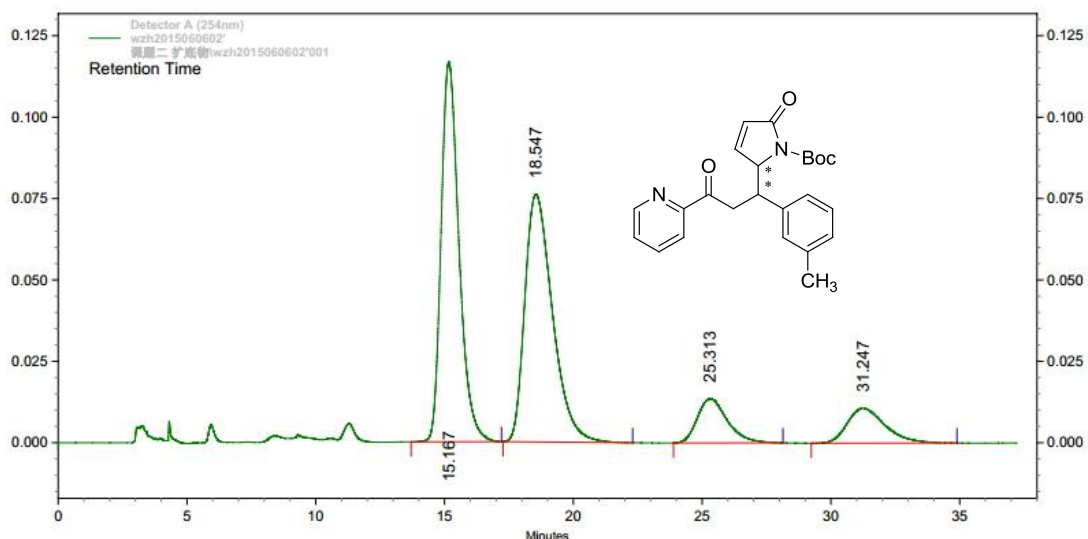

Detector  
A  
(254nm)

| PK # | Retention Time | Height | Height Percent | Area    | Area Percent |
|------|----------------|--------|----------------|---------|--------------|
| 1    | 15.167         | 116621 | 53.74          | 5636469 | 41.74        |
| 2    | 18.547         | 76061  | 35.05          | 5677470 | 42.05        |
| 3    | 25.313         | 13590  | 6.26           | 1094784 | 8.11         |
| 4    | 31.247         | 10728  | 4.94           | 1093623 | 8.10         |

| Totals | 217000 | 100.00 | 13502346 | 100.00 |
|--------|--------|--------|----------|--------|
|--------|--------|--------|----------|--------|

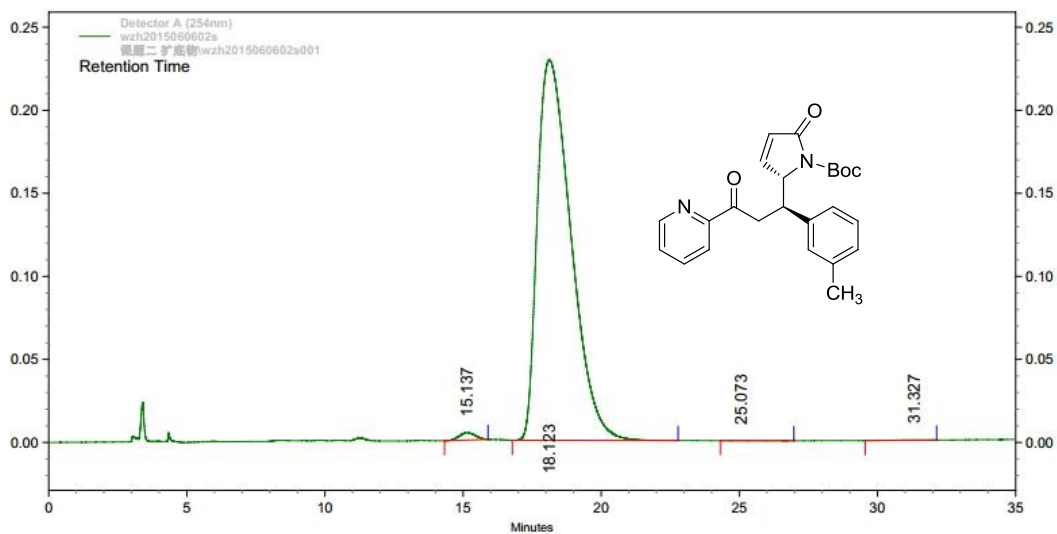

Detector  
A  
(254nm)

| PK # | Retention Time | Height | Height Percent | Area     | Area Percent |
|------|----------------|--------|----------------|----------|--------------|
| 1    | 15.137         | 4416   | 1.89           | 178082   | 0.91         |
| 2    | 18.123         | 229009 | 98.05          | 19318581 | 99.04        |
| 3    | 25.073         | 20     | 0.01           | 1299     | 0.01         |
| 4    | 31.327         | 114    | 0.05           | 8634     | 0.04         |

| Totals | 233559 | 100.00 | 19506596 | 100.00 |
|--------|--------|--------|----------|--------|
|--------|--------|--------|----------|--------|

# <sup>1</sup>H NMR, <sup>13</sup>C NMR and HPLC of 3m

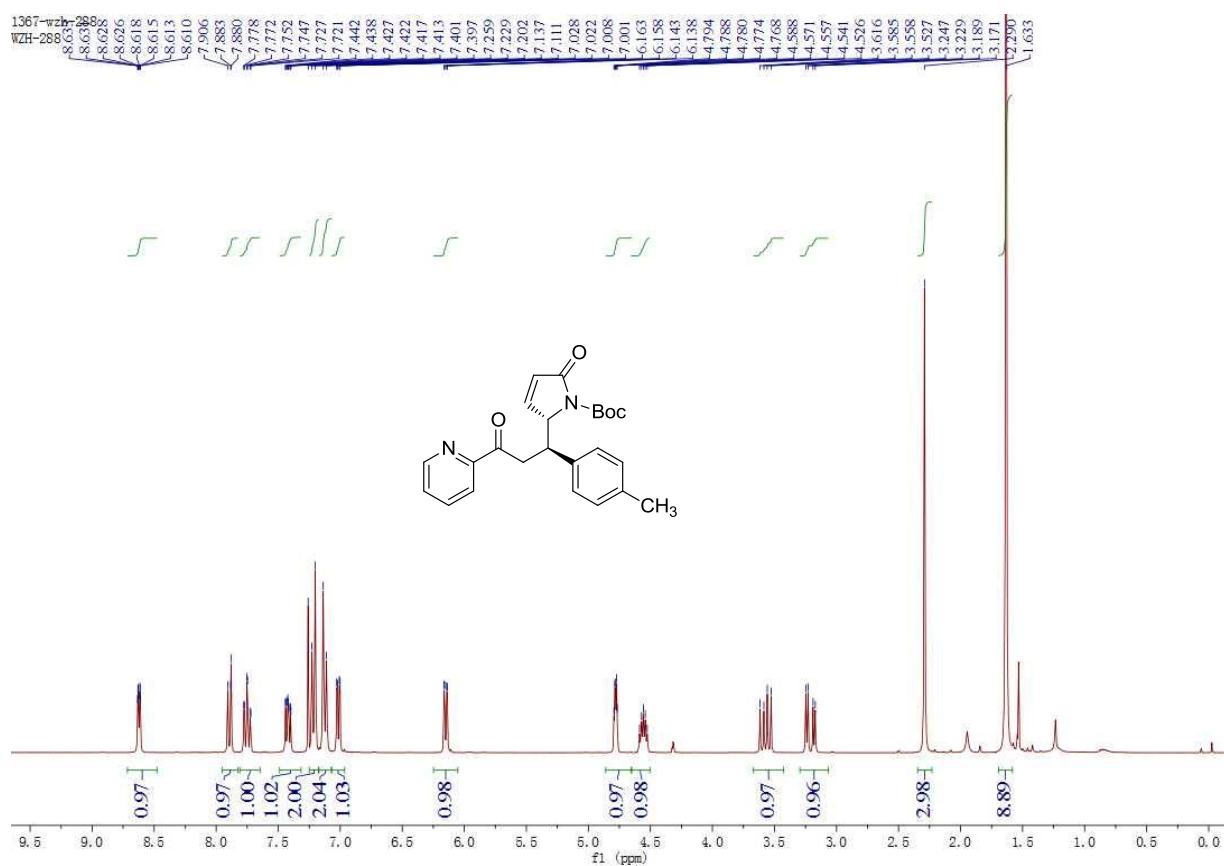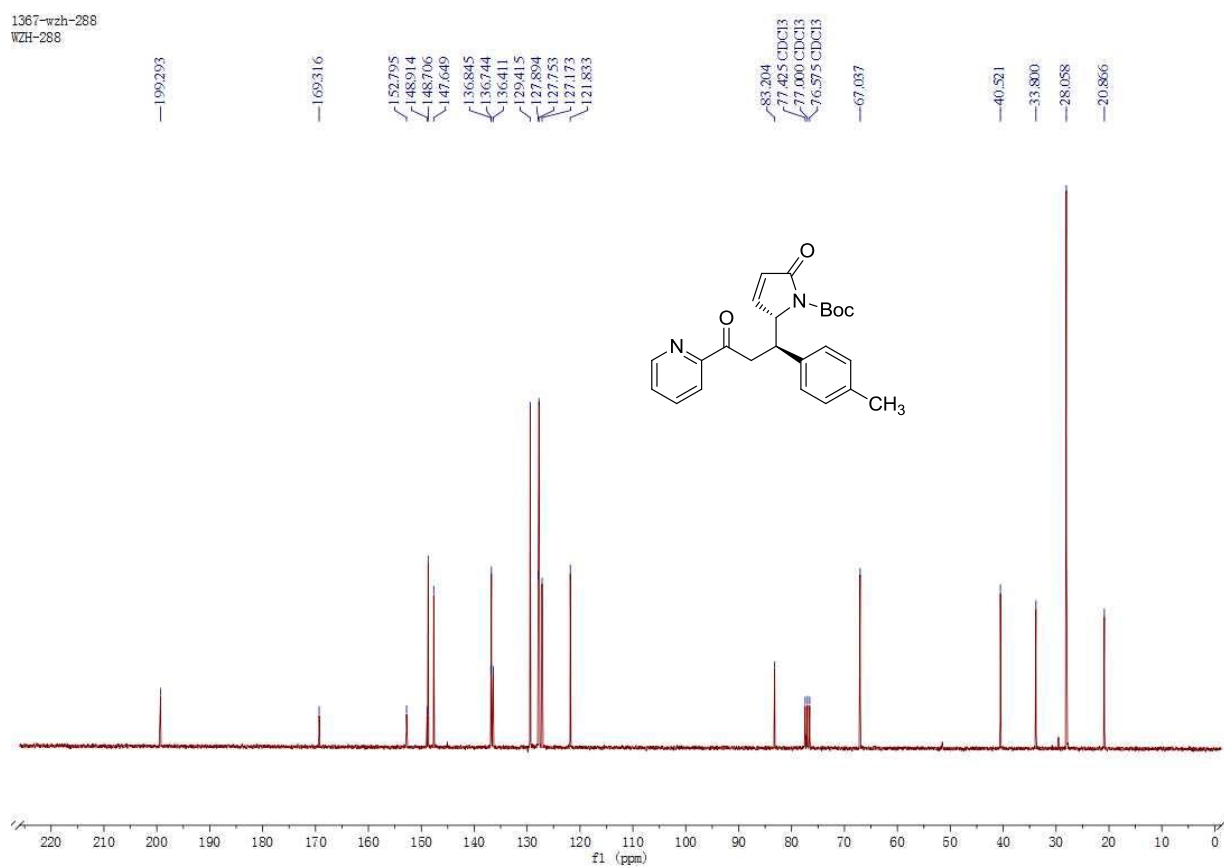

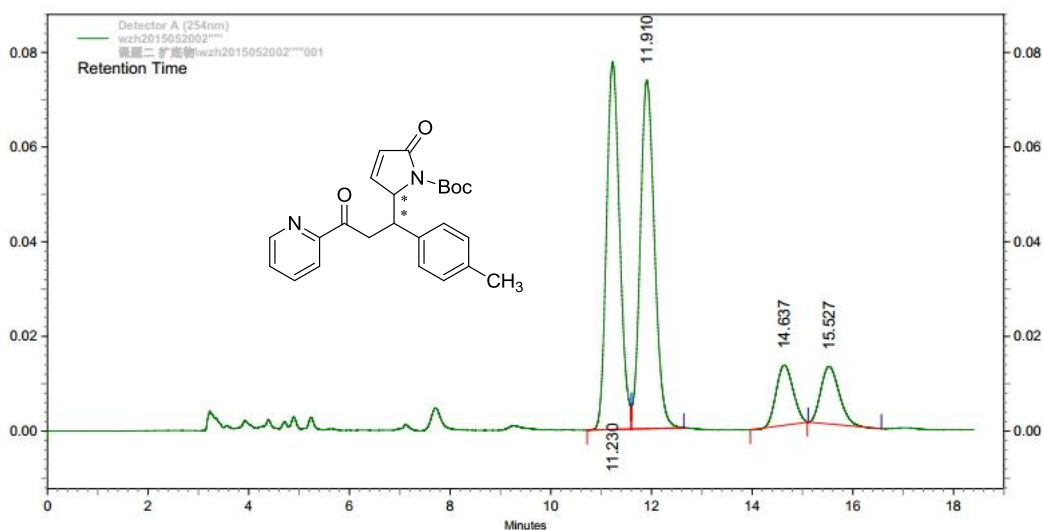

Detector  
A  
(254nm)

| Pk # | Retention Time | Height | Height Percent | Area    | Area Percent |
|------|----------------|--------|----------------|---------|--------------|
| 1    | 11.230         | 77660  | 44.09          | 1412523 | 40.79        |
| 2    | 11.910         | 73605  | 41.79          | 1446005 | 41.76        |
| 3    | 14.637         | 12708  | 7.22           | 296359  | 8.56         |
| 4    | 15.527         | 12148  | 6.90           | 307806  | 8.89         |

| Totals |  | 176121 | 100.00 | 3462693 | 100.00 |
|--------|--|--------|--------|---------|--------|
|--------|--|--------|--------|---------|--------|

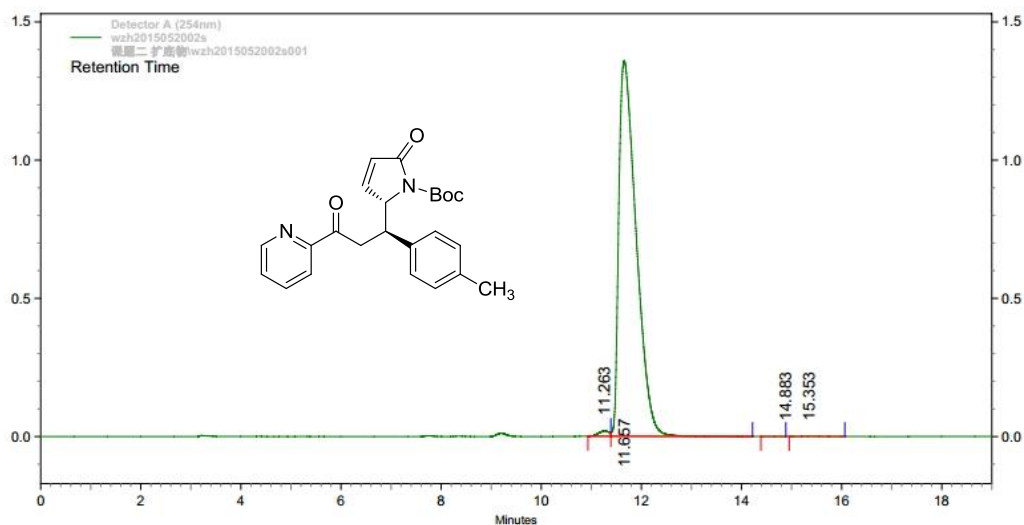

Detector  
A  
(254nm)

| Pk # | Retention Time | Height  | Height Percent | Area     | Area Percent |
|------|----------------|---------|----------------|----------|--------------|
| 1    | 11.263         | 18953   | 1.37           | 283215   | 0.86         |
| 2    | 11.657         | 1358722 | 98.57          | 32690912 | 99.07        |
| 3    | 14.883         | 1       | 0.00           | 123      | 0.00         |
| 4    | 15.353         | 809     | 0.06           | 24716    | 0.07         |

| Totals |  | 1378485 | 100.00 | 32998966 | 100.00 |
|--------|--|---------|--------|----------|--------|
|--------|--|---------|--------|----------|--------|

# <sup>1</sup>H NMR, <sup>13</sup>C NMR and HPLC of 3n

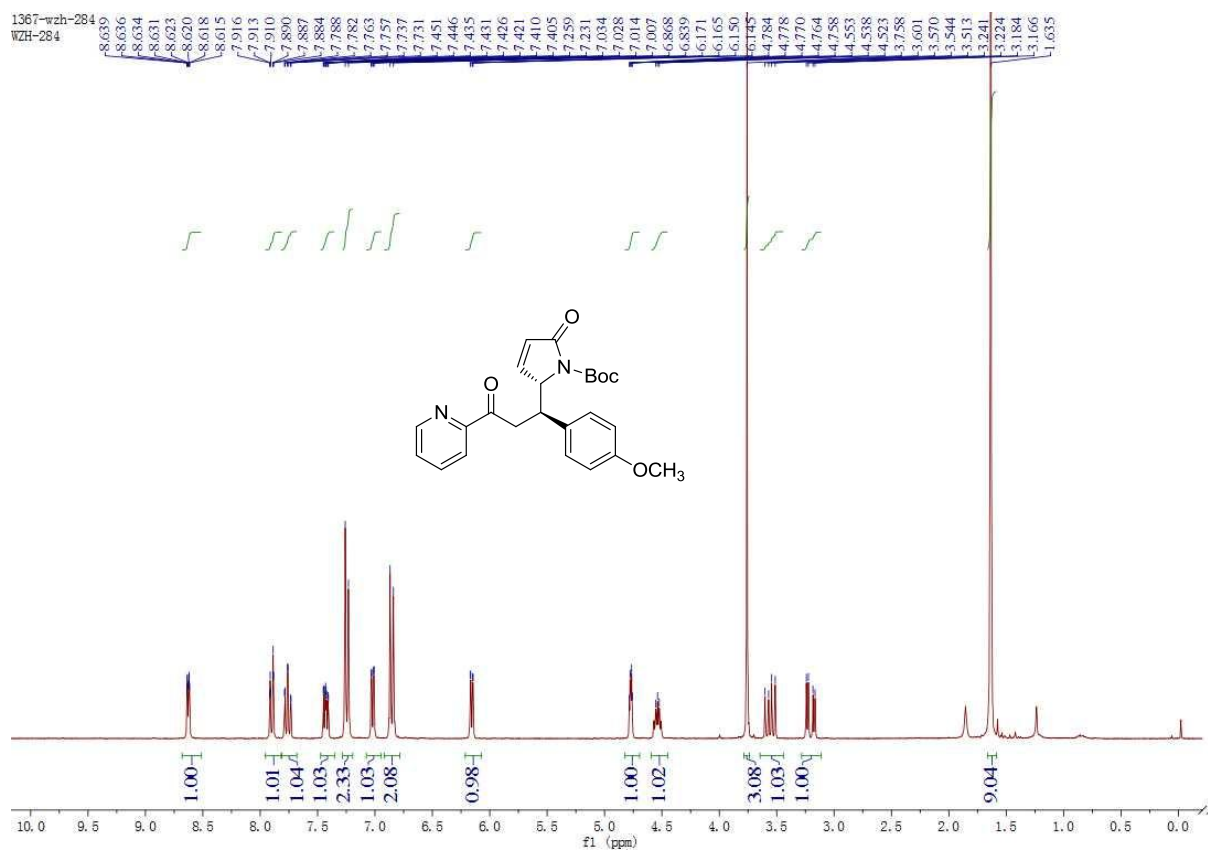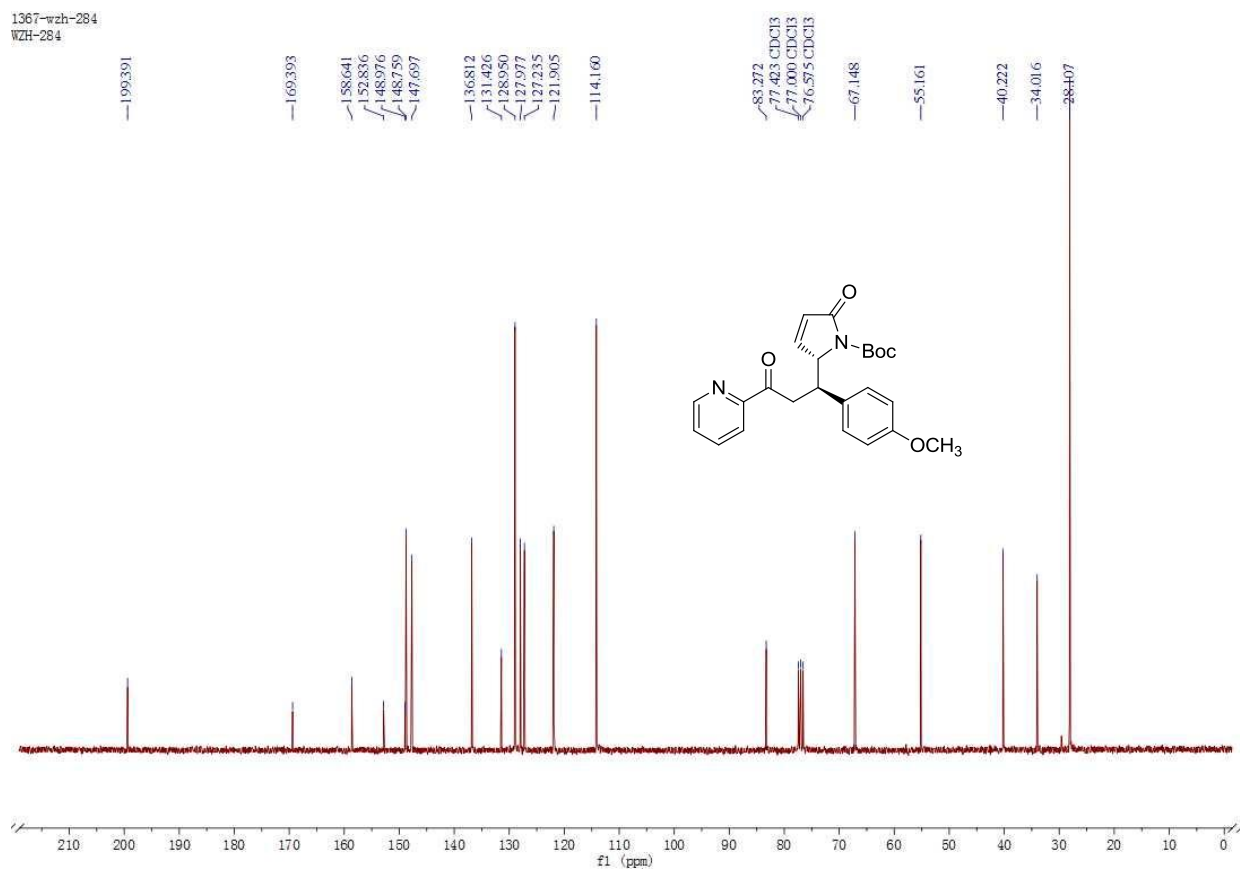

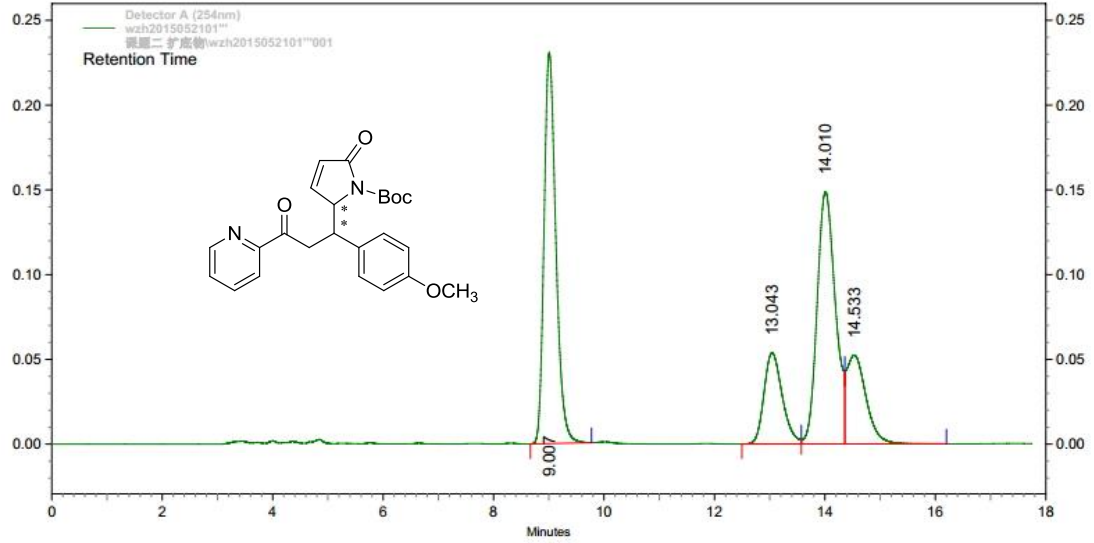

Detector  
A  
(254nm)

| Pk # | Retention Time | Height | Height Percent | Area    | Area Percent |
|------|----------------|--------|----------------|---------|--------------|
| 1    | 9.007          | 230589 | 47.48          | 3428799 | 36.55        |
| 2    | 13.043         | 53892  | 11.10          | 1234372 | 13.16        |
| 3    | 14.010         | 148743 | 30.63          | 3430677 | 36.57        |
| 4    | 14.533         | 52443  | 10.80          | 1287529 | 13.72        |

| Totals | 485667 | 100.00 | 9381377 | 100.00 |
|--------|--------|--------|---------|--------|
|--------|--------|--------|---------|--------|

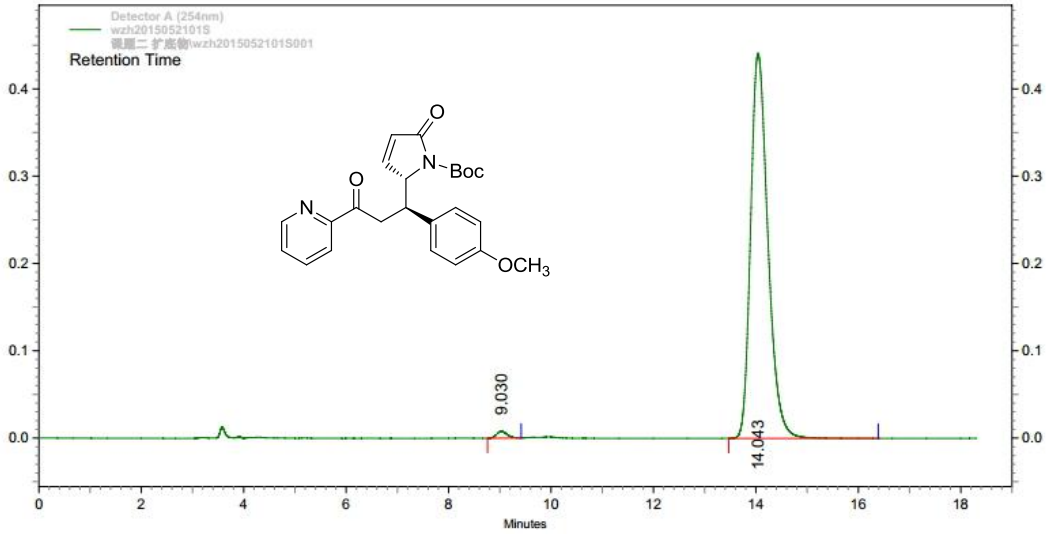

Detector  
A  
(254nm)

| Pk # | Retention Time | Height | Height Percent | Area     | Area Percent |
|------|----------------|--------|----------------|----------|--------------|
| 1    | 9.030          | 7967   | 1.77           | 112198   | 1.07         |
| 2    | 14.043         | 441060 | 98.23          | 10327556 | 98.93        |

| Totals | 449027 | 100.00 | 10439754 | 100.00 |
|--------|--------|--------|----------|--------|
|--------|--------|--------|----------|--------|

# <sup>1</sup>H NMR, <sup>13</sup>C NMR and HPLC of 3o

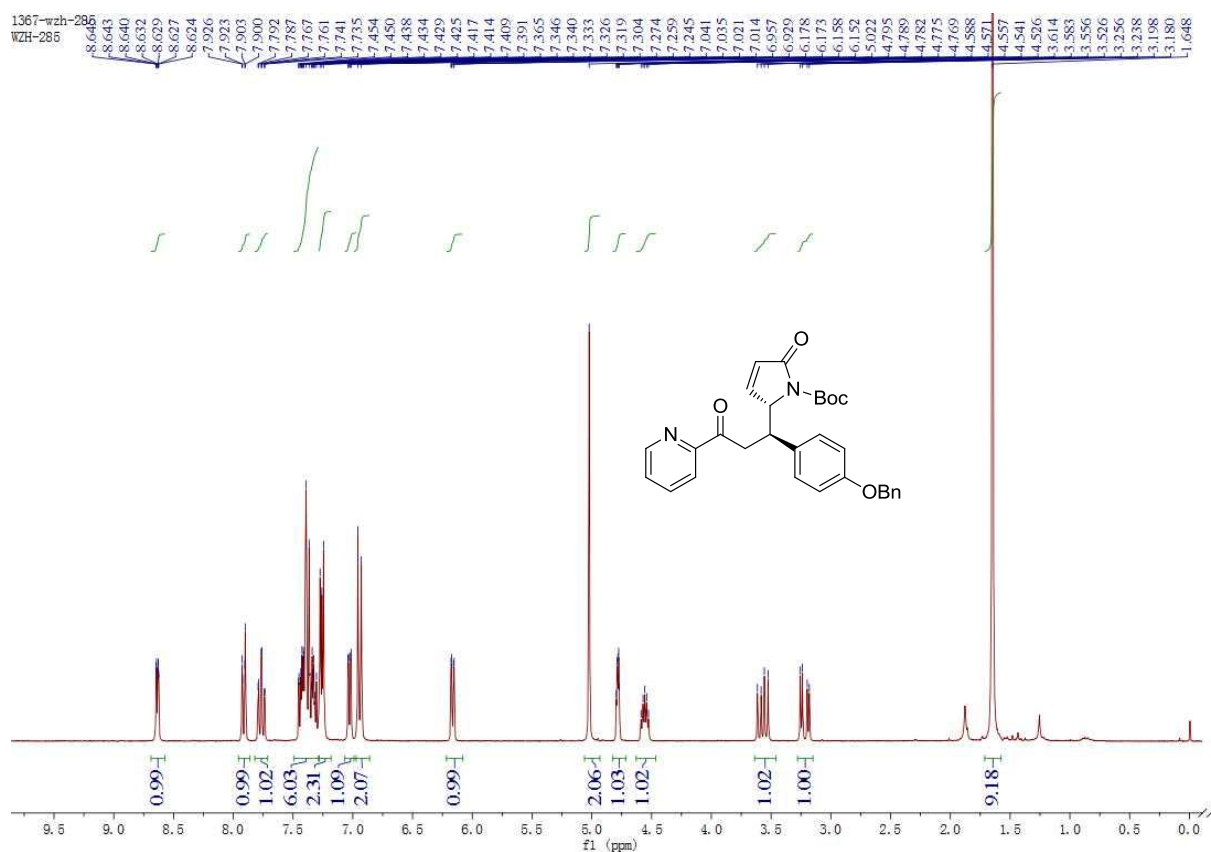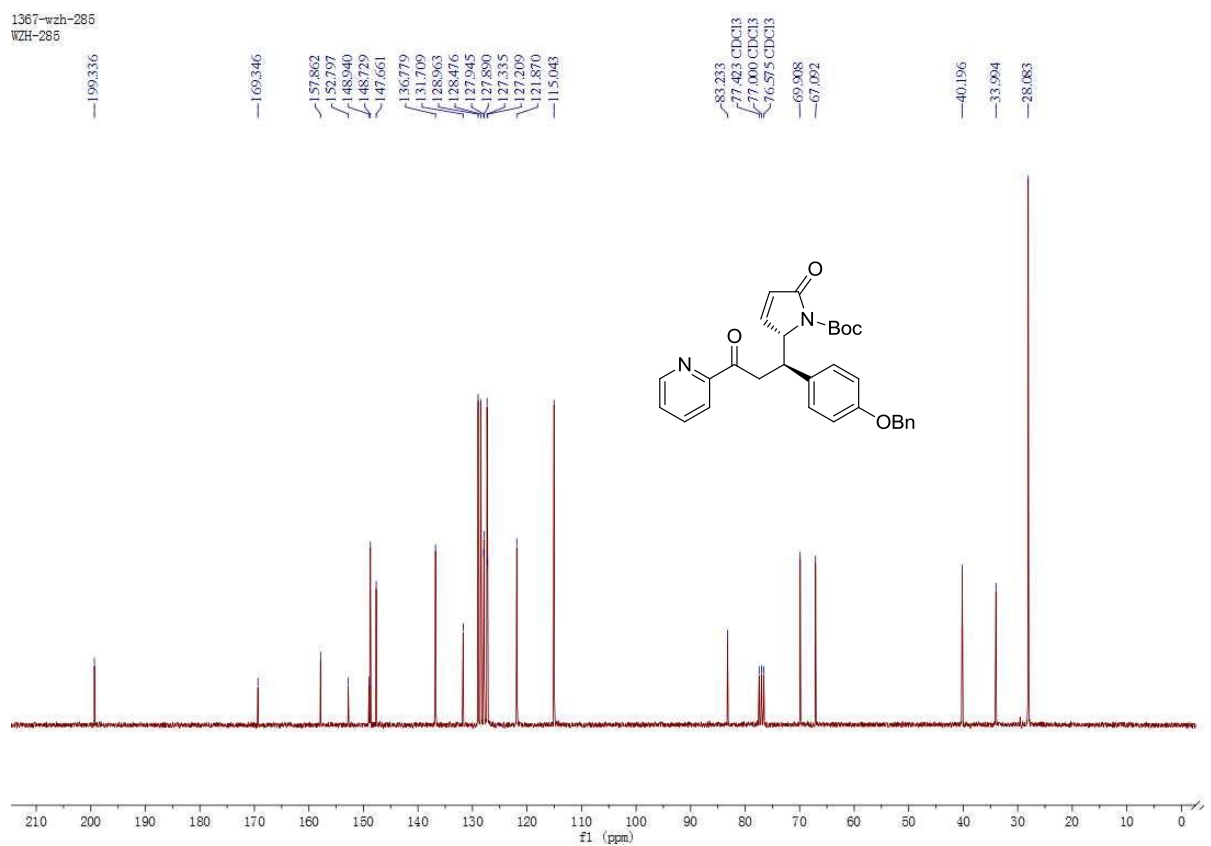

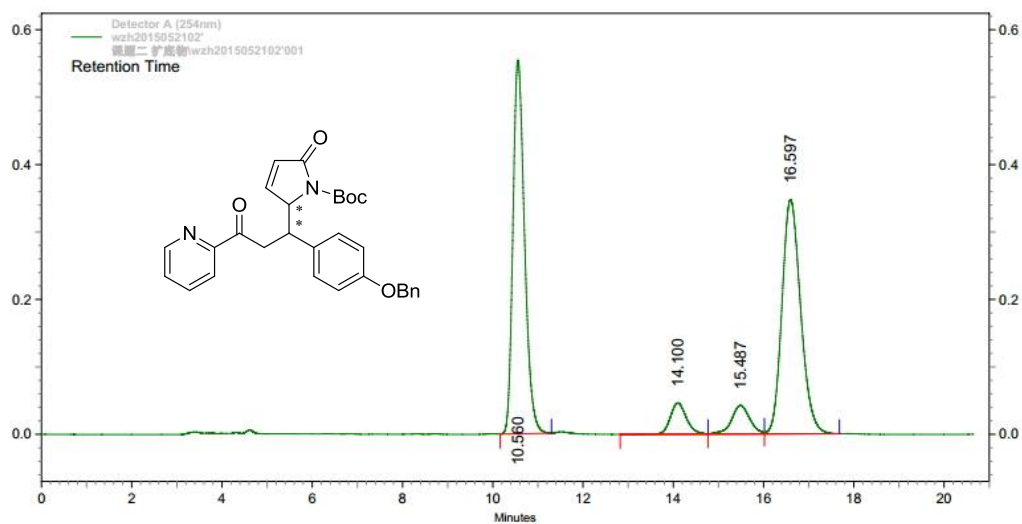

Detector  
A  
(254nm)

| Pk # | Retention Time | Height | Height Percent | Area    | Area Percent |
|------|----------------|--------|----------------|---------|--------------|
| 1    | 10.560         | 554029 | 55.94          | 9916468 | 44.58        |
| 2    | 14.100         | 46433  | 4.69           | 1150910 | 5.17         |
| 3    | 15.487         | 42378  | 4.28           | 1184371 | 5.32         |
| 4    | 16.597         | 347642 | 35.10          | 9992020 | 44.92        |

| Totals | 990482 | 100.00 | 22243769 | 100.00 |
|--------|--------|--------|----------|--------|
|--------|--------|--------|----------|--------|

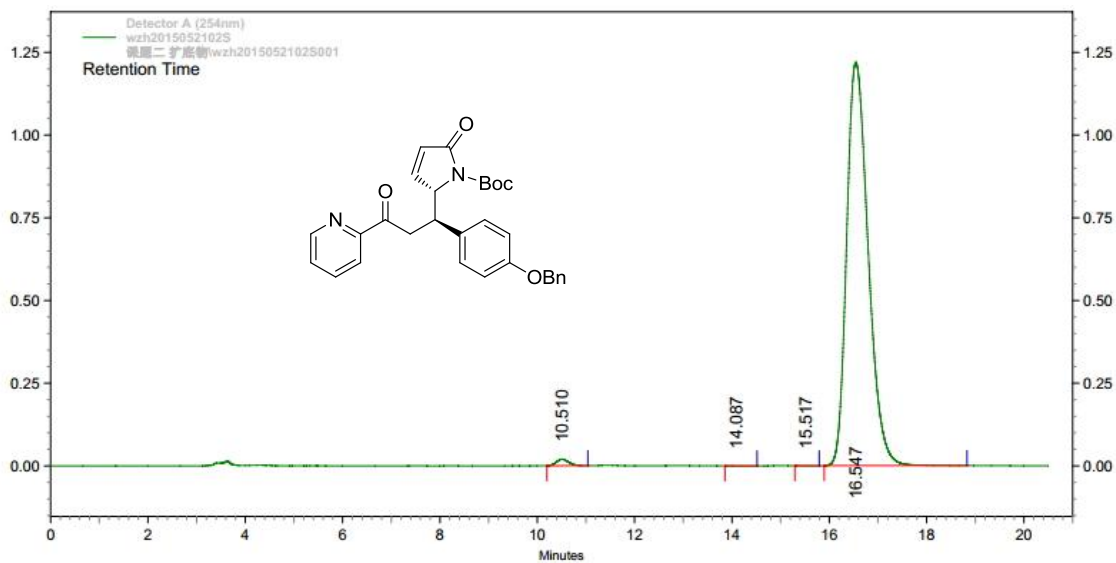

Detector  
A  
(254nm)

| Pk # | Retention Time | Height  | Height Percent | Area     | Area Percent |
|------|----------------|---------|----------------|----------|--------------|
| 1    | 10.510         | 19717   | 1.59           | 342459   | 0.91         |
| 2    | 14.087         | 34      | 0.00           | 587      | 0.00         |
| 3    | 15.517         | 129     | 0.01           | 2076     | 0.01         |
| 4    | 16.547         | 1219382 | 98.40          | 37378826 | 99.09        |

| Totals | 1239262 | 100.00 | 37723948 | 100.00 |
|--------|---------|--------|----------|--------|
|--------|---------|--------|----------|--------|



# <sup>1</sup>H NMR, <sup>13</sup>C NMR and HPLC of 3p

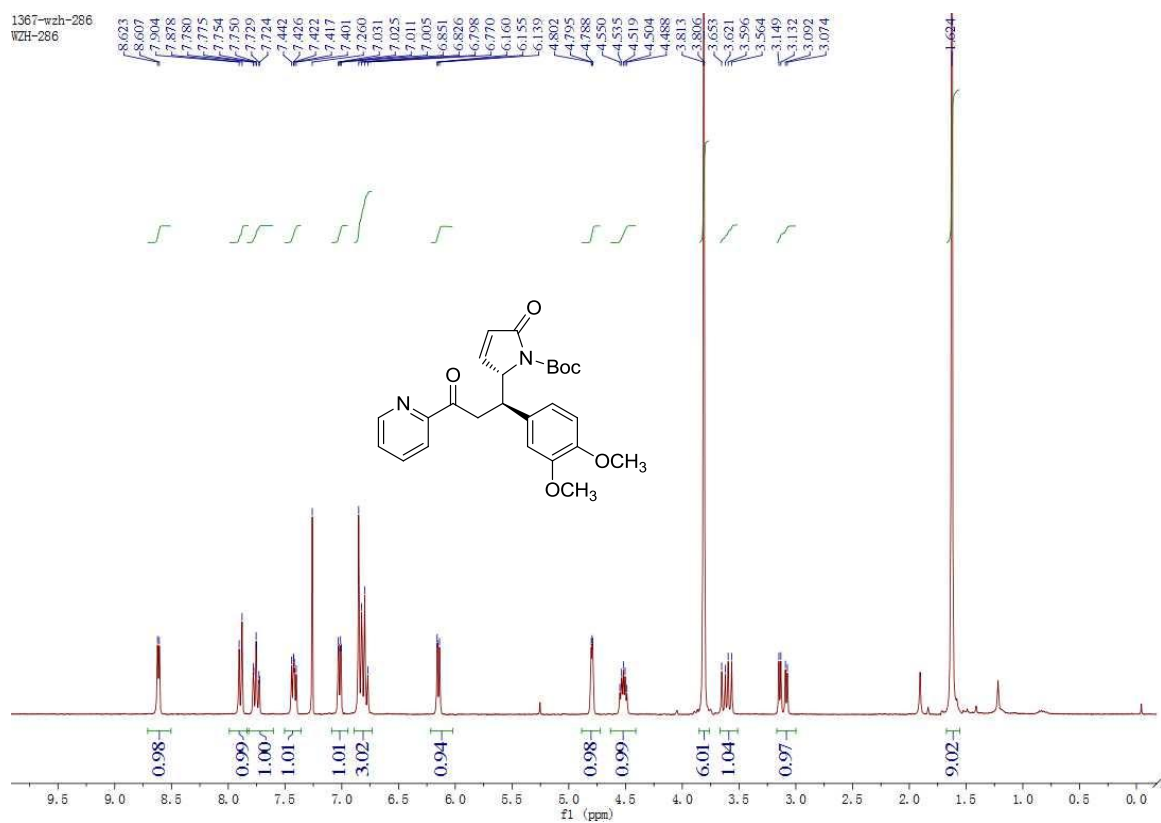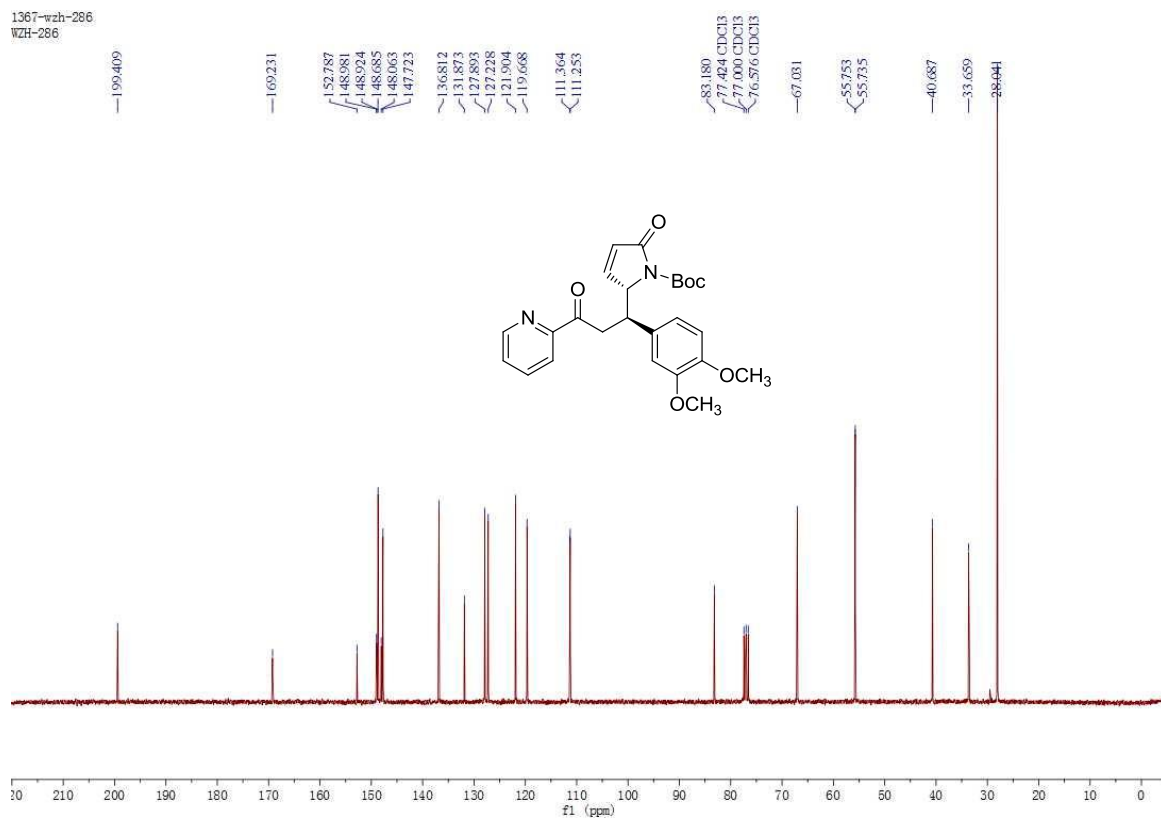

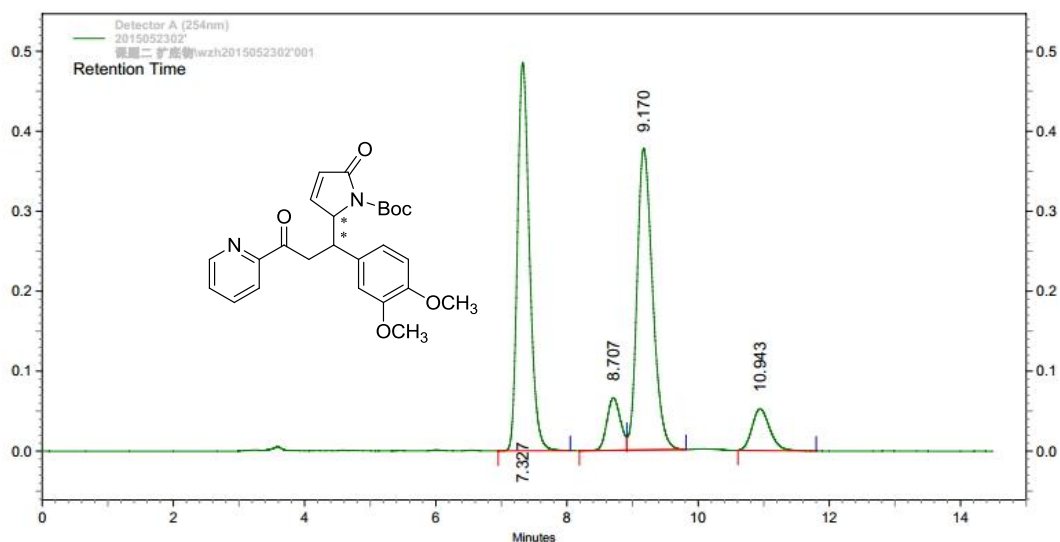

Detector  
A  
(254nm)

| Pk # | Retention Time | Height | Height Percent | Area    | Area Percent |
|------|----------------|--------|----------------|---------|--------------|
| 1    | 7.327          | 485630 | 49.52          | 6154621 | 43.10        |
| 2    | 8.707          | 65620  | 6.69           | 942539  | 6.60         |
| 3    | 9.170          | 377158 | 38.46          | 6202145 | 43.43        |
| 4    | 10.943         | 52247  | 5.33           | 981384  | 6.87         |

| Totals | 980655 | 100.00 | 14280689 | 100.00 |
|--------|--------|--------|----------|--------|
|--------|--------|--------|----------|--------|

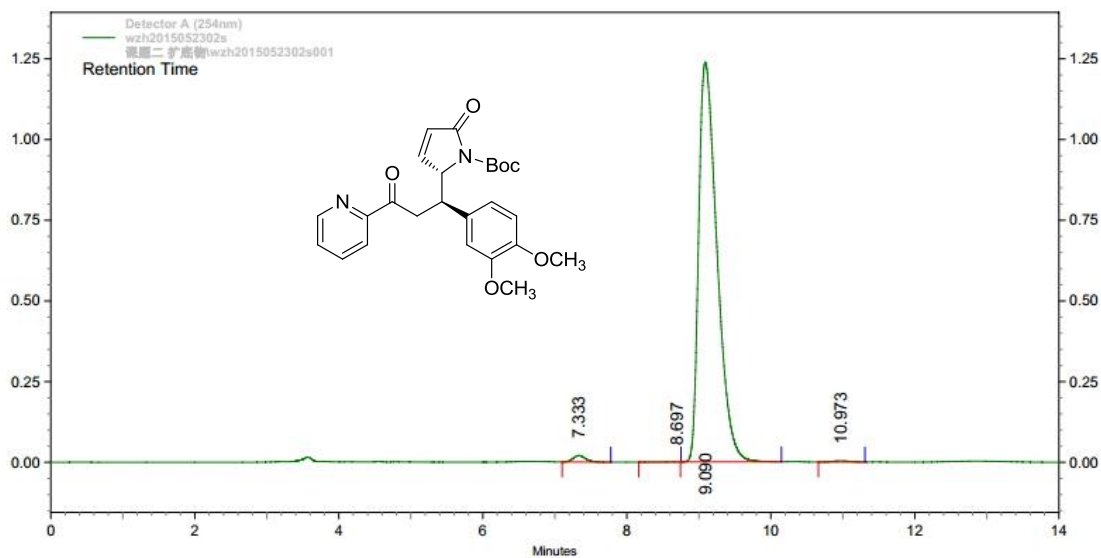

Detector  
A  
(254nm)

| Pk # | Retention Time | Height  | Height Percent | Area     | Area Percent |
|------|----------------|---------|----------------|----------|--------------|
| 1    | 7.333          | 20097   | 1.59           | 244055   | 1.10         |
| 2    | 8.697          | 59      | 0.00           | 2836     | 0.01         |
| 3    | 9.090          | 1237775 | 98.11          | 21870085 | 98.61        |
| 4    | 10.973         | 3715    | 0.29           | 62281    | 0.28         |

| Totals | 1261646 | 100.00 | 22179257 | 100.00 |
|--------|---------|--------|----------|--------|
|--------|---------|--------|----------|--------|

# <sup>1</sup>H NMR, <sup>13</sup>C NMR and HPLC of 3q

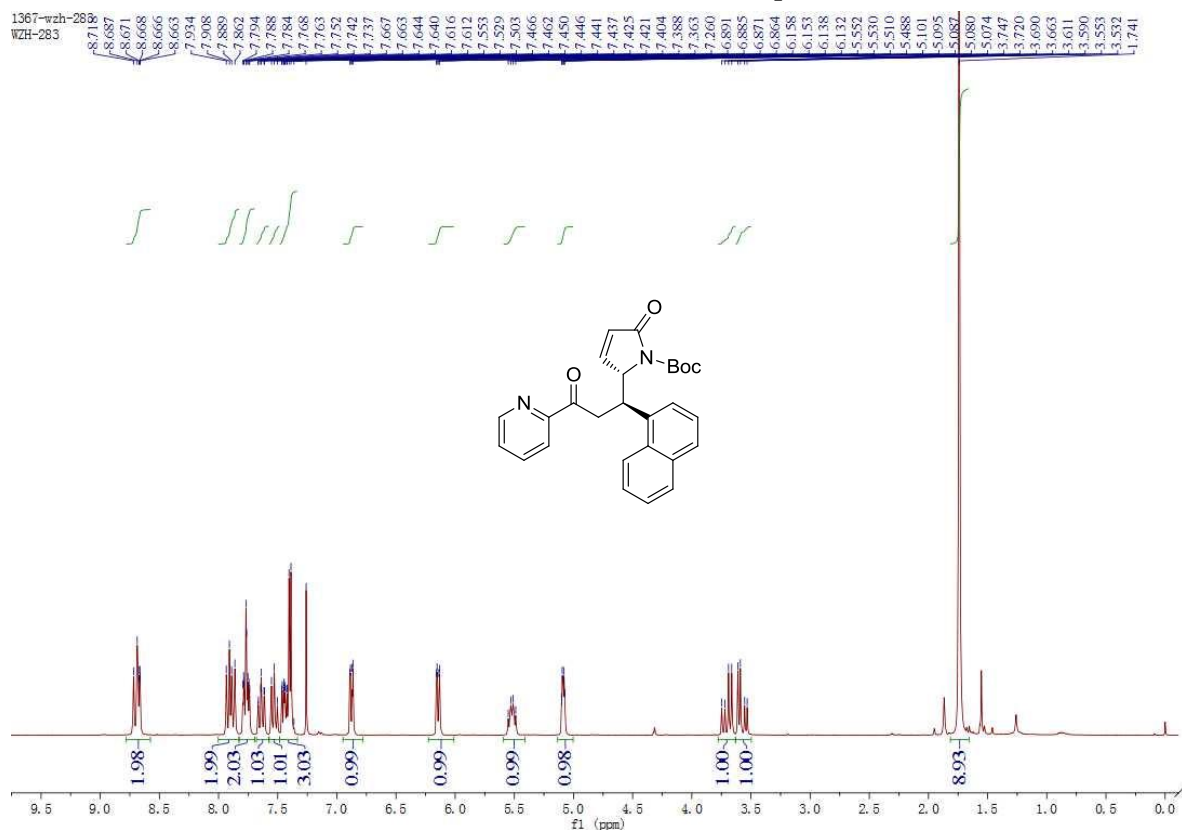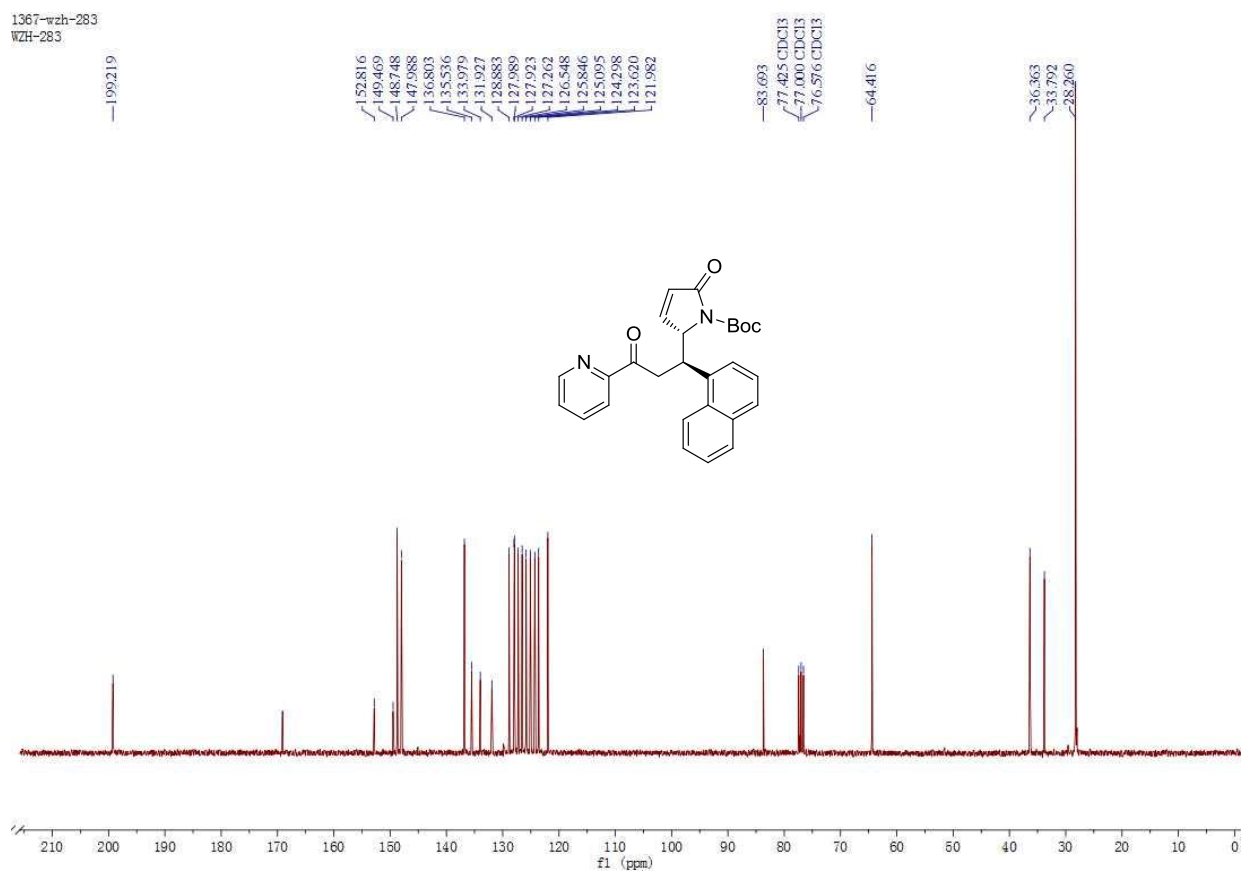

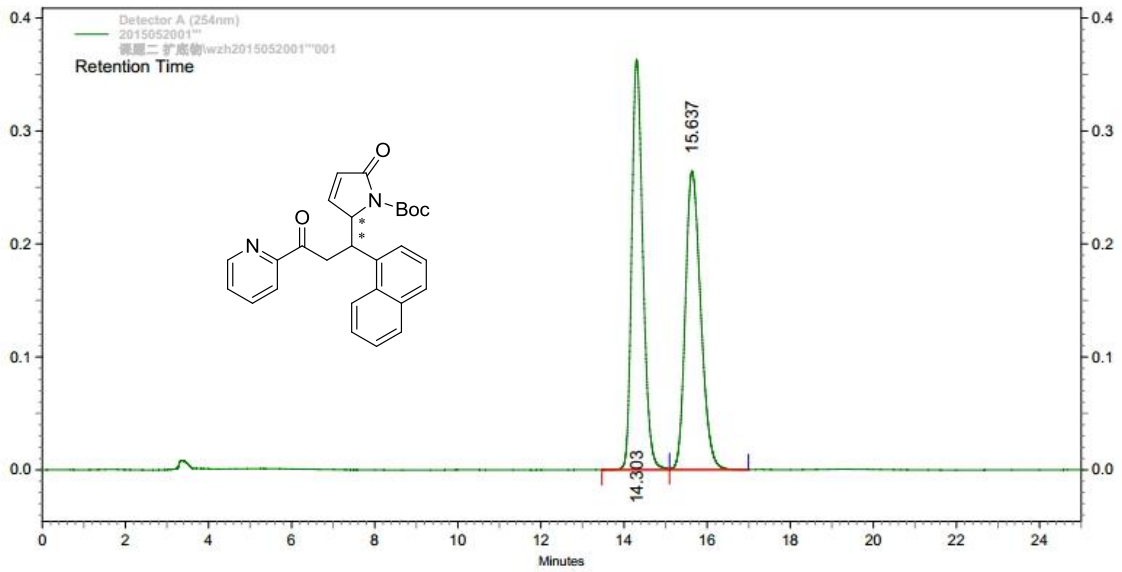

Detector  
A  
(254nm)

| Pk # | Retention Time | Height | Height Percent | Area    | Area Percent |
|------|----------------|--------|----------------|---------|--------------|
| 1    | 14.303         | 363075 | 57.87          | 6780270 | 49.97        |
| 2    | 15.637         | 264298 | 42.13          | 6789101 | 50.03        |

| Totals |  | 627373 | 100.00 | 13569371 | 100.00 |
|--------|--|--------|--------|----------|--------|
|--------|--|--------|--------|----------|--------|

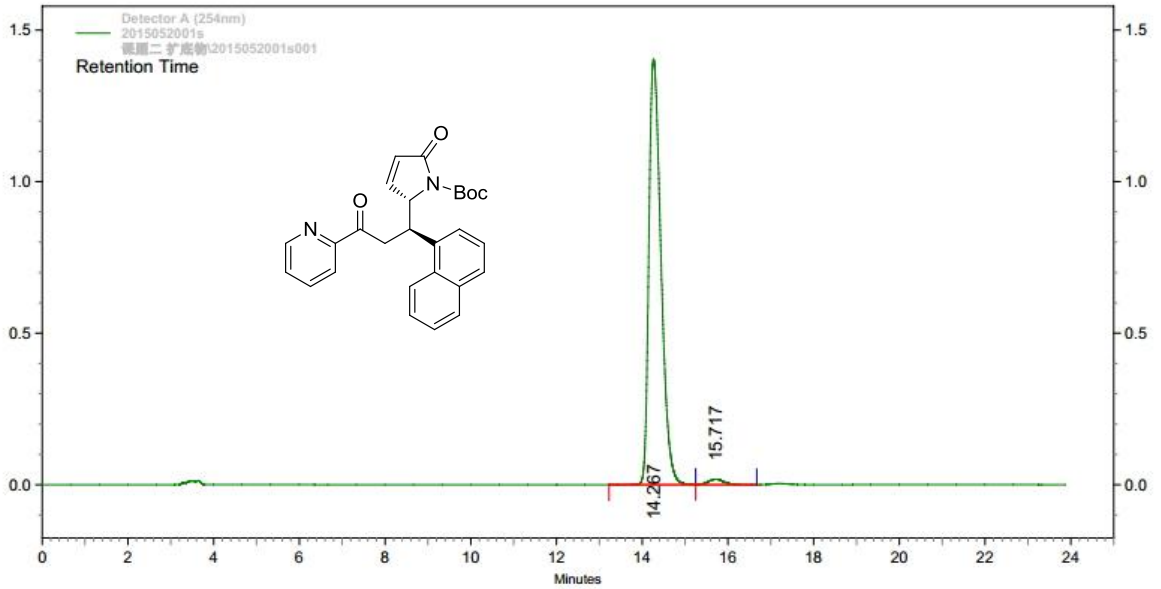

Detector  
A  
(254nm)

| Pk # | Retention Time | Height  | Height Percent | Area     | Area Percent |
|------|----------------|---------|----------------|----------|--------------|
| 1    | 14.267         | 1402950 | 98.75          | 27544760 | 98.34        |
| 2    | 15.717         | 17829   | 1.25           | 464940   | 1.66         |

| Totals |  | 1420779 | 100.00 | 28009700 | 100.00 |
|--------|--|---------|--------|----------|--------|
|--------|--|---------|--------|----------|--------|

# <sup>1</sup>H NMR, <sup>13</sup>C NMR and HPLC of 3r

1367-wzh-282  
WZH-282

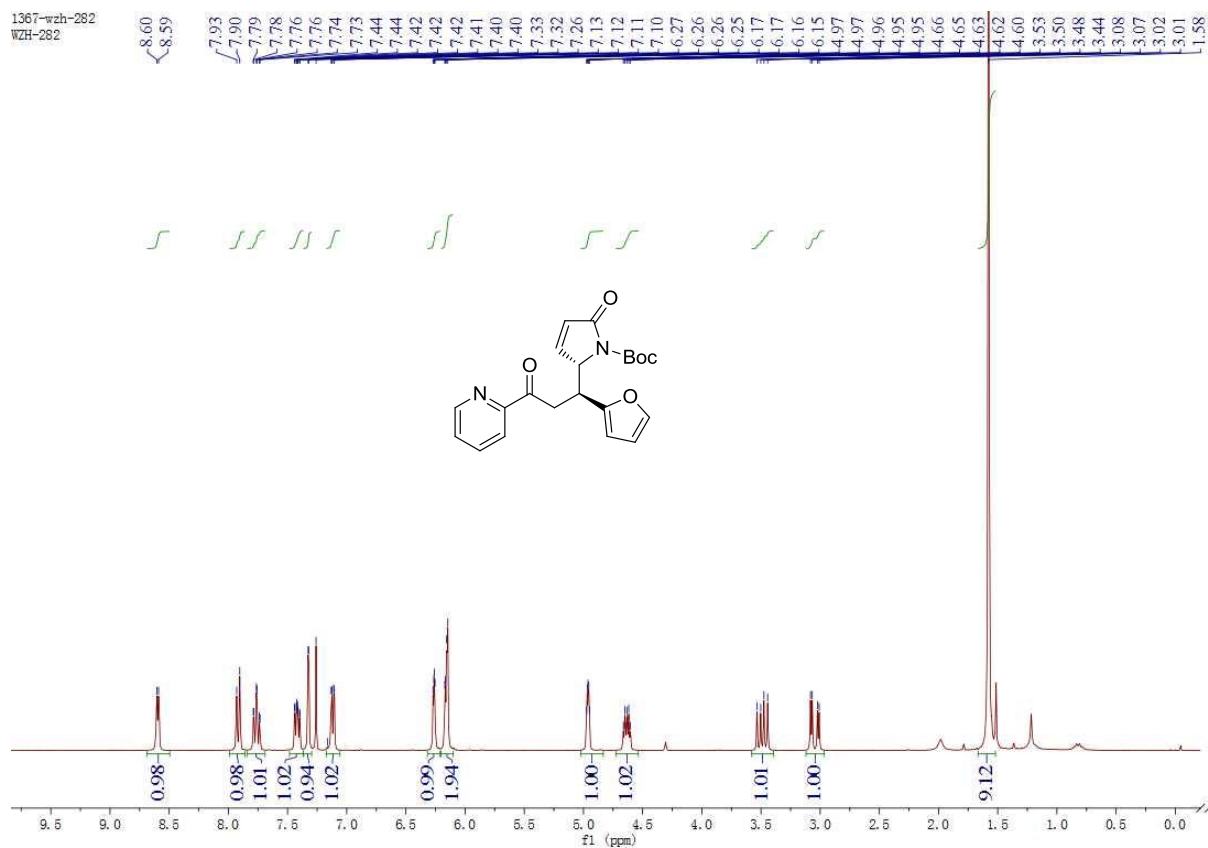

1367-wzh-282  
WZH-282

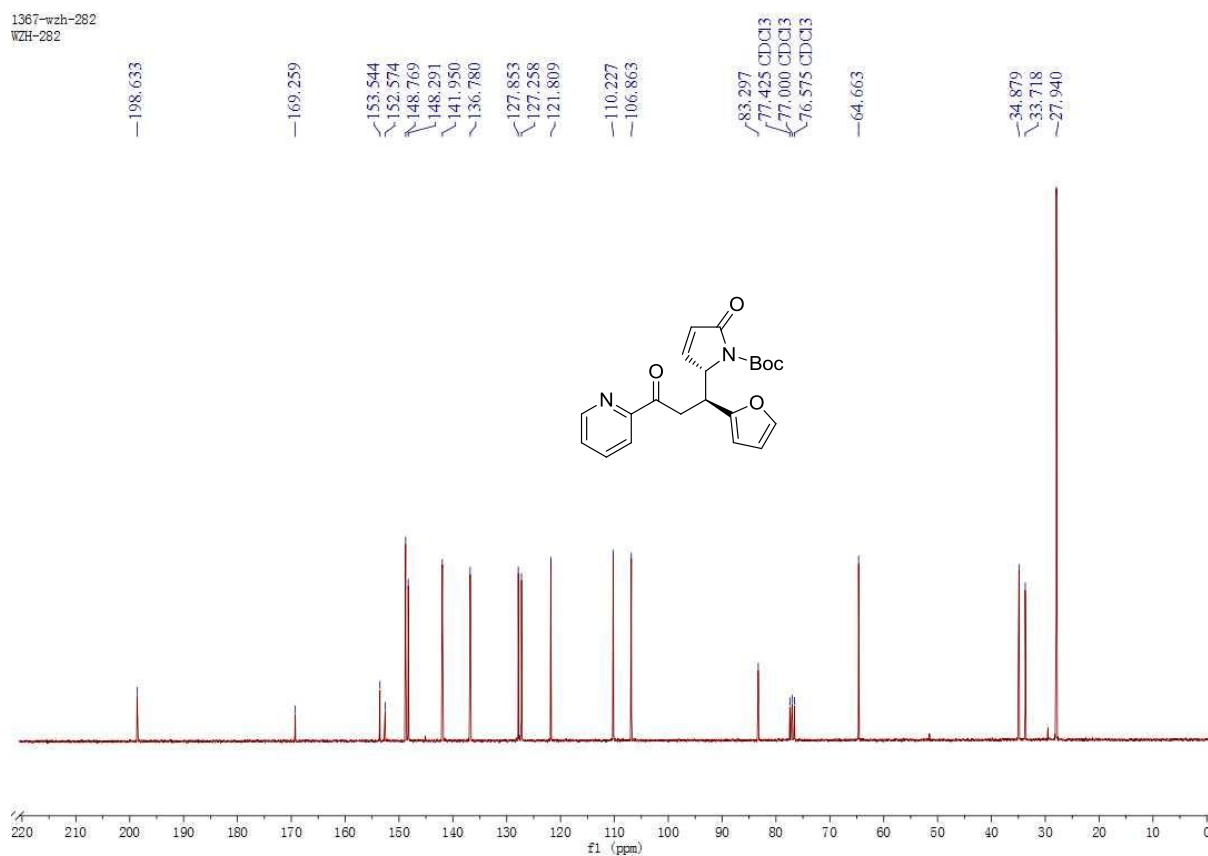

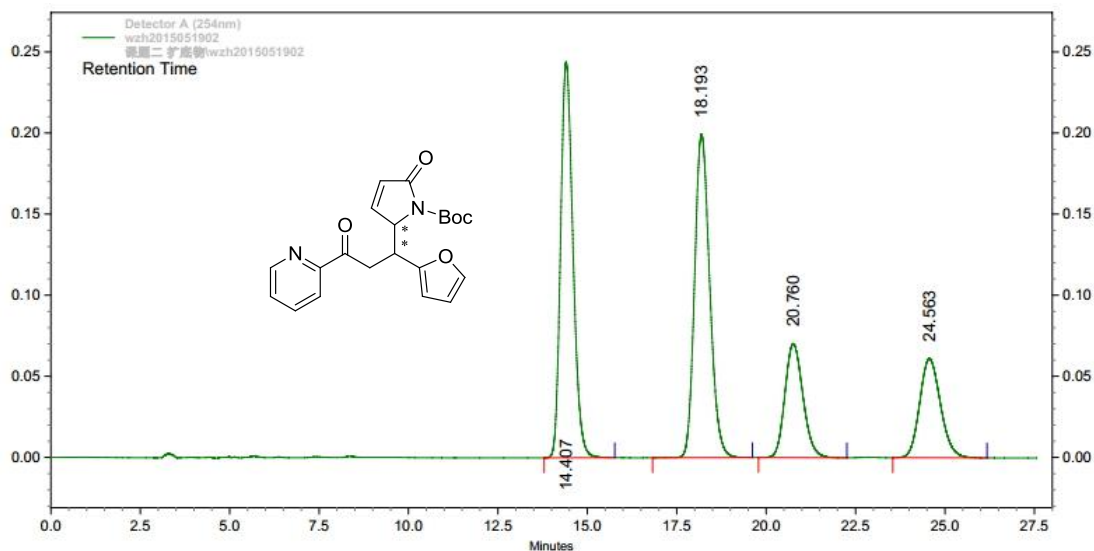

| PK # | Retention Time | Height | Height Percent | Area    | Area Percent |
|------|----------------|--------|----------------|---------|--------------|
| 1    | 14.407         | 243953 | 42.46          | 5850972 | 35.14        |
| 2    | 18.193         | 199292 | 34.68          | 5853974 | 35.16        |
| 3    | 20.760         | 70264  | 12.23          | 2469604 | 14.83        |
| 4    | 24.563         | 61086  | 10.63          | 2473580 | 14.86        |

| Totals | Height | Height Percent | Area     | Area Percent |
|--------|--------|----------------|----------|--------------|
|        | 574595 | 100.00         | 16648130 | 100.00       |

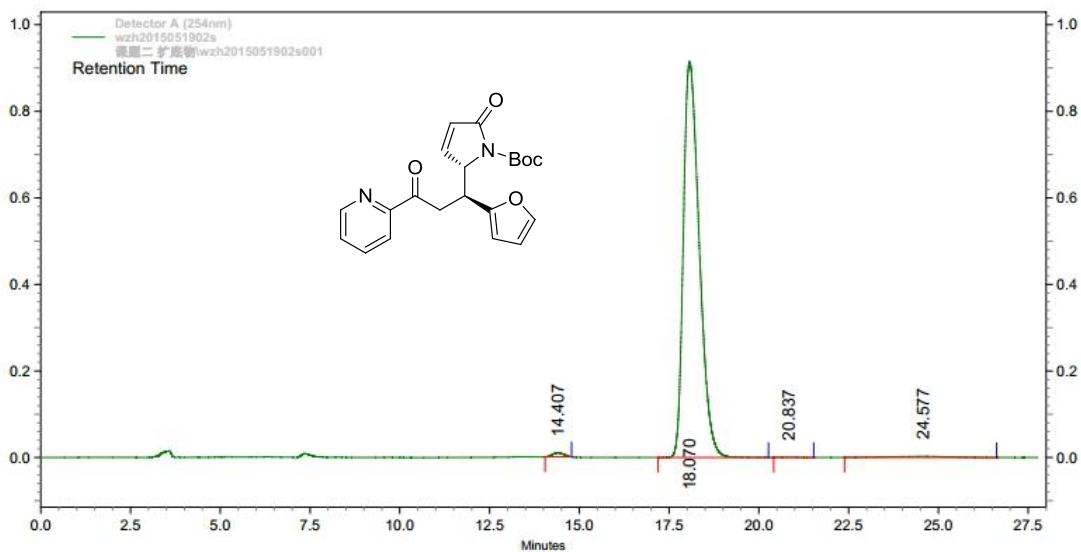

| PK # | Retention Time | Height | Height Percent | Area     | Area Percent |
|------|----------------|--------|----------------|----------|--------------|
| 1    | 14.407         | 9628   | 1.04           | 205502   | 0.72         |
| 2    | 18.070         | 914809 | 98.63          | 28144643 | 98.20        |
| 3    | 20.837         | 567    | 0.06           | 15675    | 0.05         |
| 4    | 24.577         | 2493   | 0.27           | 294596   | 1.03         |

| Totals | Height | Height Percent | Area     | Area Percent |
|--------|--------|----------------|----------|--------------|
|        | 927497 | 100.00         | 28660416 | 100.00       |

# <sup>1</sup>H NMR, <sup>13</sup>C NMR and HPLC of 3s

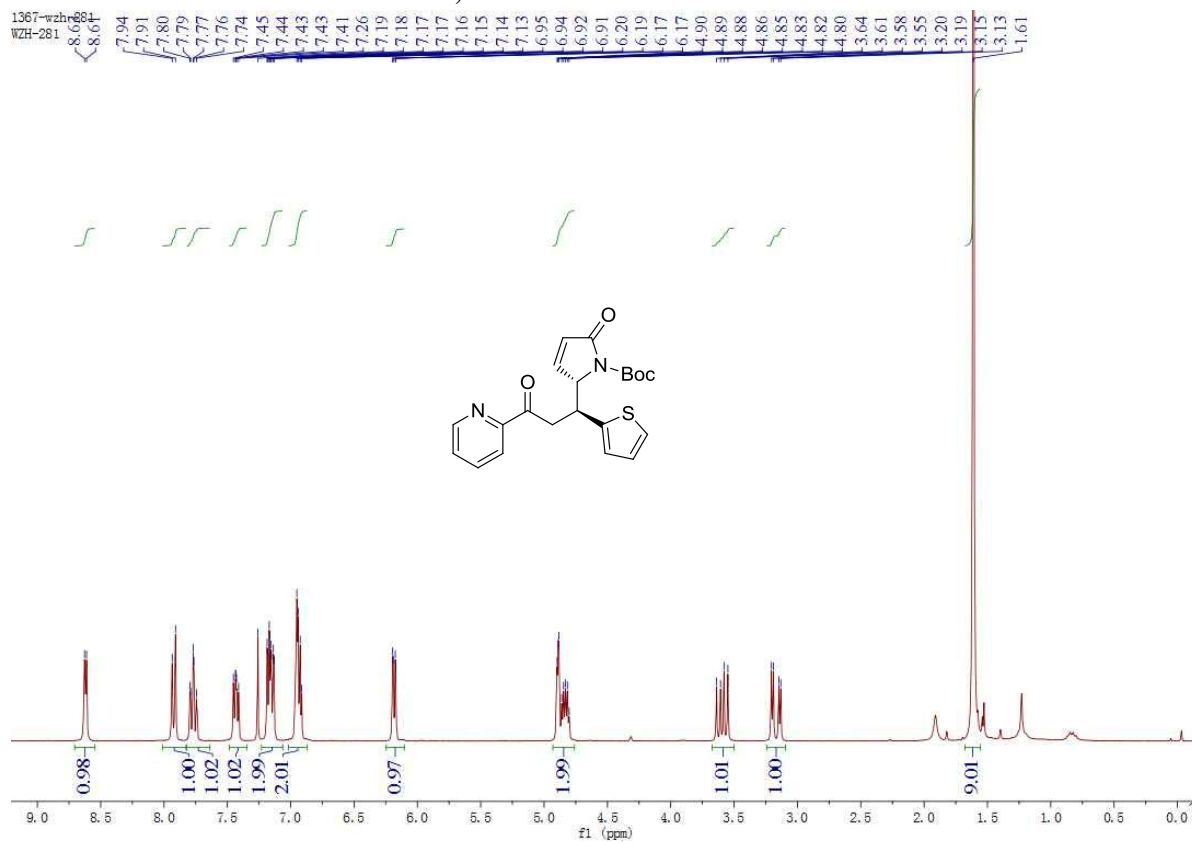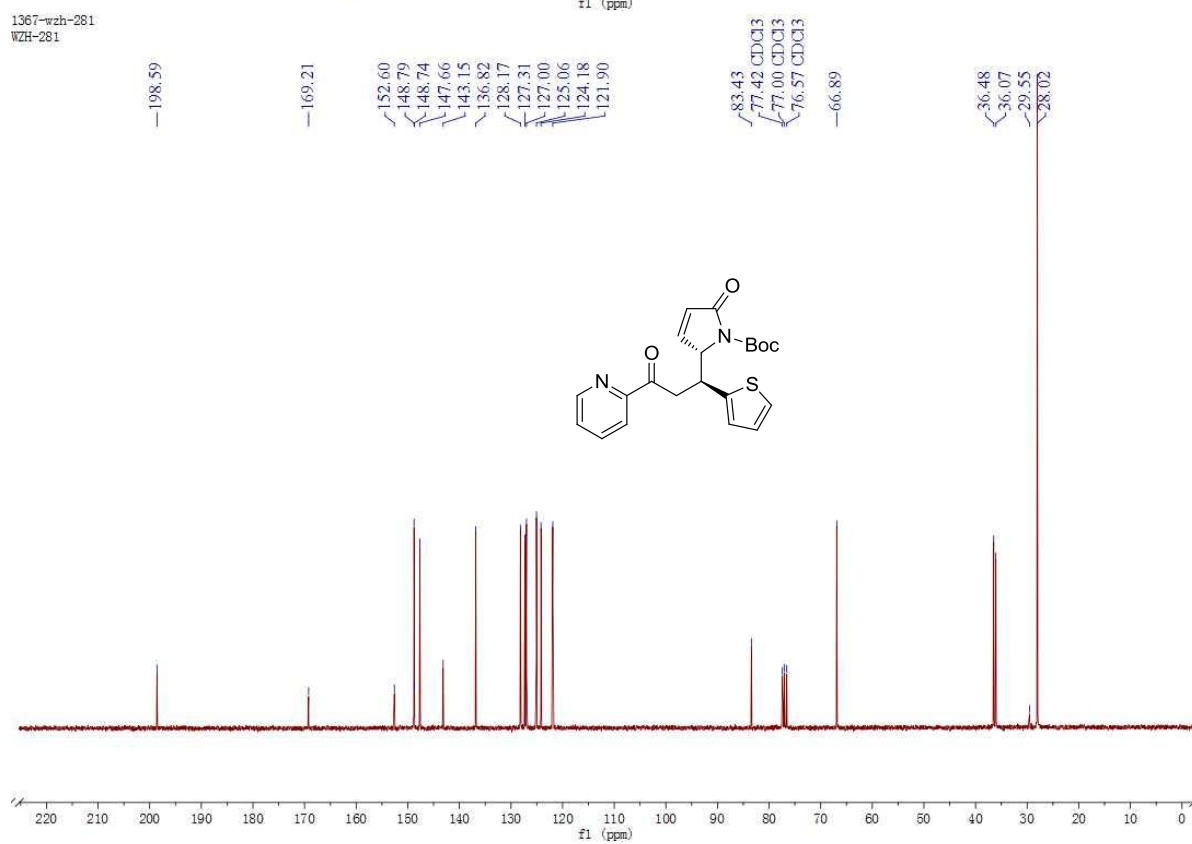

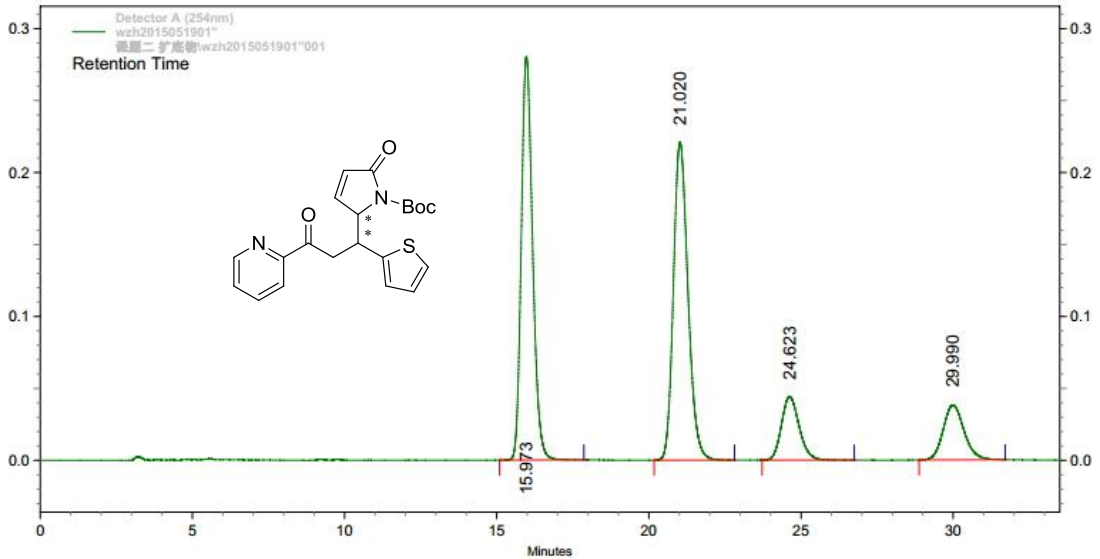

Detector  
A  
(254nm)

| Pk # | Retention Time | Height | Height Percent | Area    | Area Percent |
|------|----------------|--------|----------------|---------|--------------|
| 1    | 15.973         | 280152 | 48.03          | 7237116 | 39.81        |
| 2    | 21.020         | 220962 | 37.88          | 7344958 | 40.41        |
| 3    | 24.623         | 44023  | 7.55           | 1783903 | 9.81         |
| 4    | 29.990         | 38156  | 6.54           | 1811739 | 9.97         |

| Totals | 583293 | 100.00 | 18177716 | 100.00 |
|--------|--------|--------|----------|--------|
|--------|--------|--------|----------|--------|

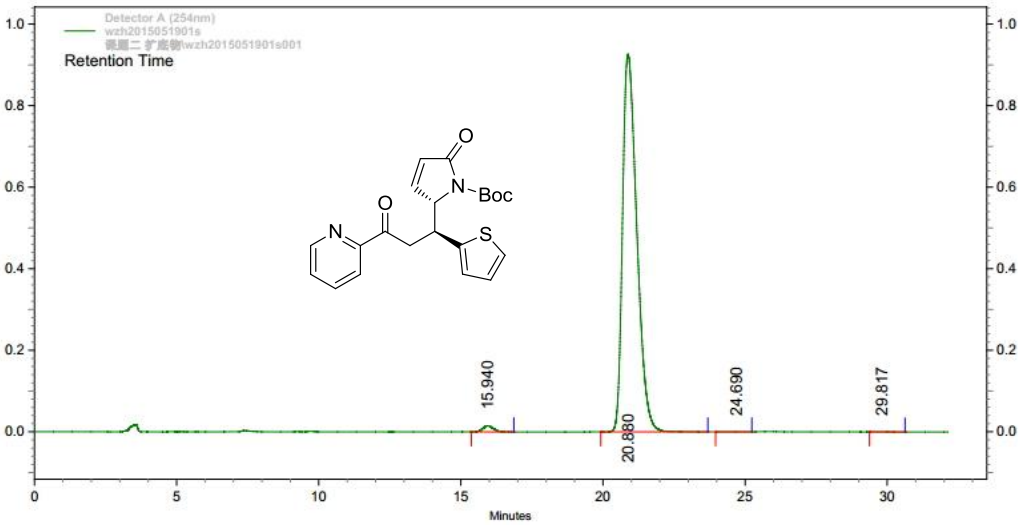

Detector  
A  
(254nm)

| Pk # | Retention Time | Height | Height Percent | Area     | Area Percent |
|------|----------------|--------|----------------|----------|--------------|
| 1    | 15.940         | 15105  | 1.60           | 388974   | 1.19         |
| 2    | 20.880         | 926290 | 98.37          | 32252531 | 98.78        |
| 3    | 24.690         | 48     | 0.01           | 1476     | 0.00         |
| 4    | 29.817         | 202    | 0.02           | 7774     | 0.02         |

| Totals | 941645 | 100.00 | 32650755 | 100.00 |
|--------|--------|--------|----------|--------|
|--------|--------|--------|----------|--------|



# <sup>1</sup>H NMR, <sup>13</sup>C NMR and HPLC of 3t

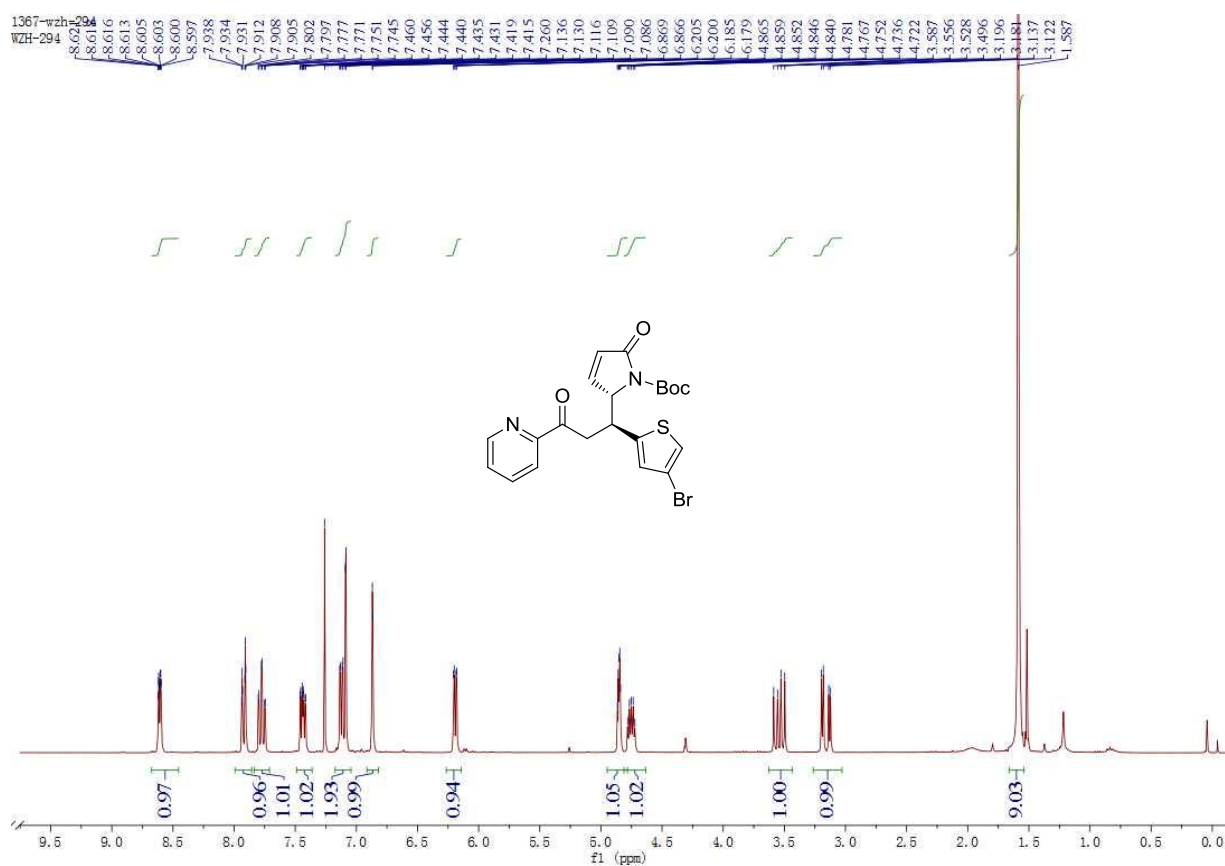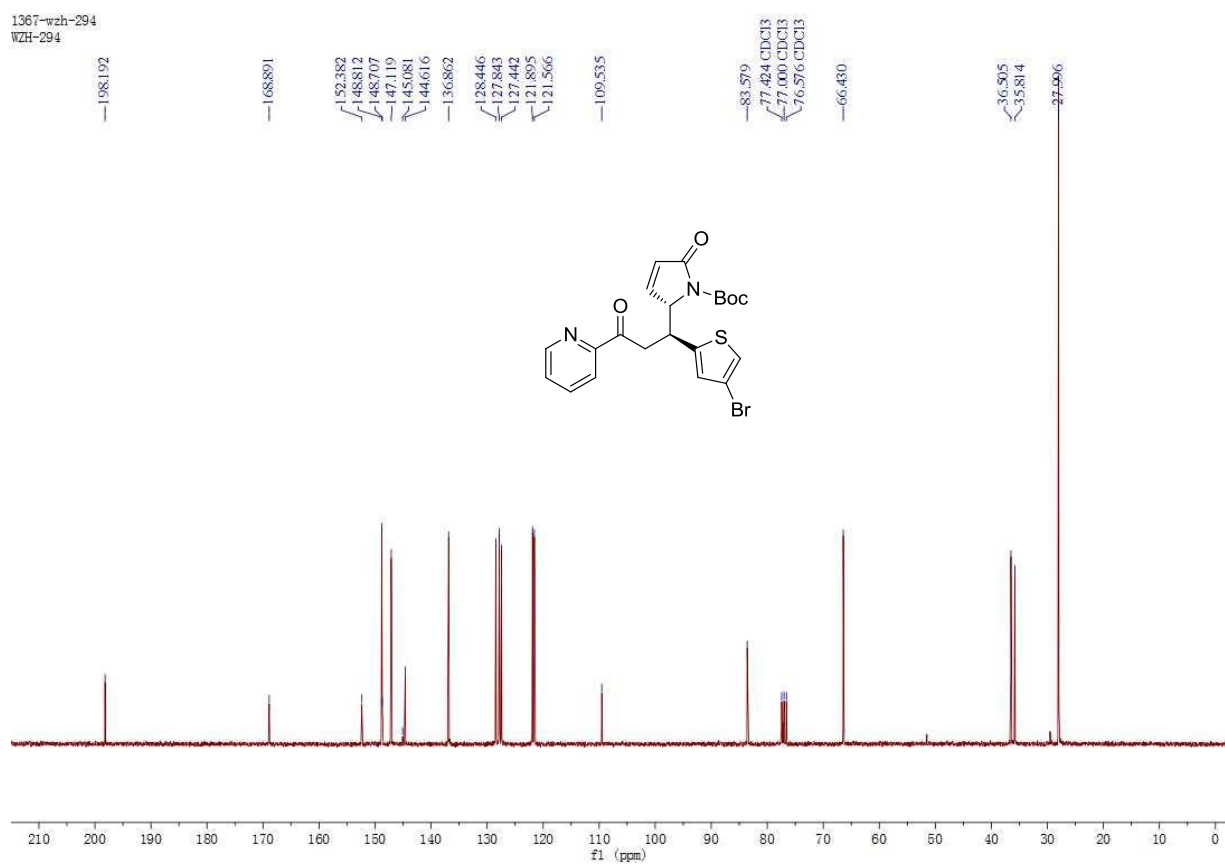

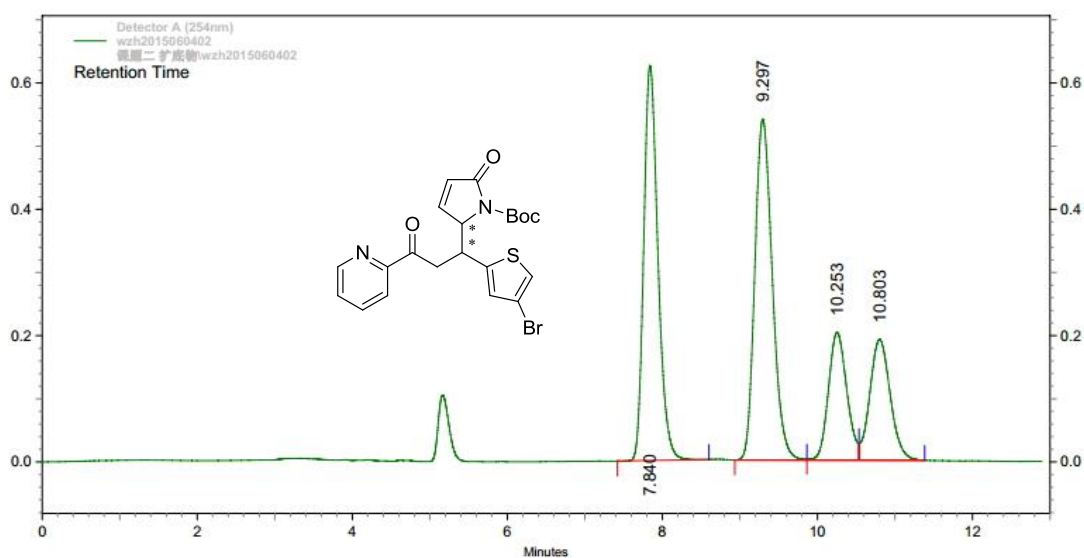

Detector  
A  
(254nm)

| Pk # | Retention Time | Height | Height Percent | Area    | Area Percent |
|------|----------------|--------|----------------|---------|--------------|
| 1    | 7.840          | 625414 | 40.12          | 7928185 | 34.15        |
| 2    | 9.297          | 539911 | 34.63          | 8450827 | 36.40        |
| 3    | 10.253         | 202386 | 12.98          | 3330928 | 14.35        |
| 4    | 10.803         | 191331 | 12.27          | 3508647 | 15.11        |

| Totals | Height  | Area     | Area Percent |
|--------|---------|----------|--------------|
|        | 1559042 | 23218587 | 100.00       |

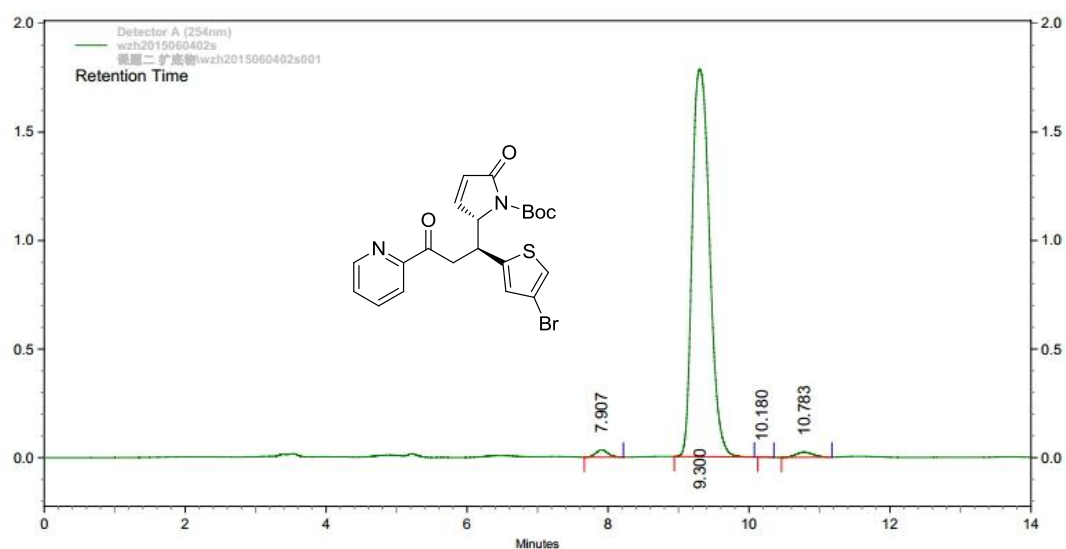

Detector  
A  
(254nm)

| Pk # | Retention Time | Height  | Height Percent | Area     | Area Percent |
|------|----------------|---------|----------------|----------|--------------|
| 1    | 7.907          | 33741   | 1.83           | 400558   | 1.28         |
| 2    | 9.300          | 1785513 | 96.88          | 30577934 | 97.46        |
| 3    | 10.180         | 274     | 0.01           | 3595     | 0.01         |
| 4    | 10.783         | 23505   | 1.28           | 392594   | 1.25         |

| Totals | Height  | Area     | Area Percent |
|--------|---------|----------|--------------|
|        | 1843033 | 31374681 | 100.00       |

# <sup>1</sup>H NMR, <sup>13</sup>C NMR and HPLC of 3u

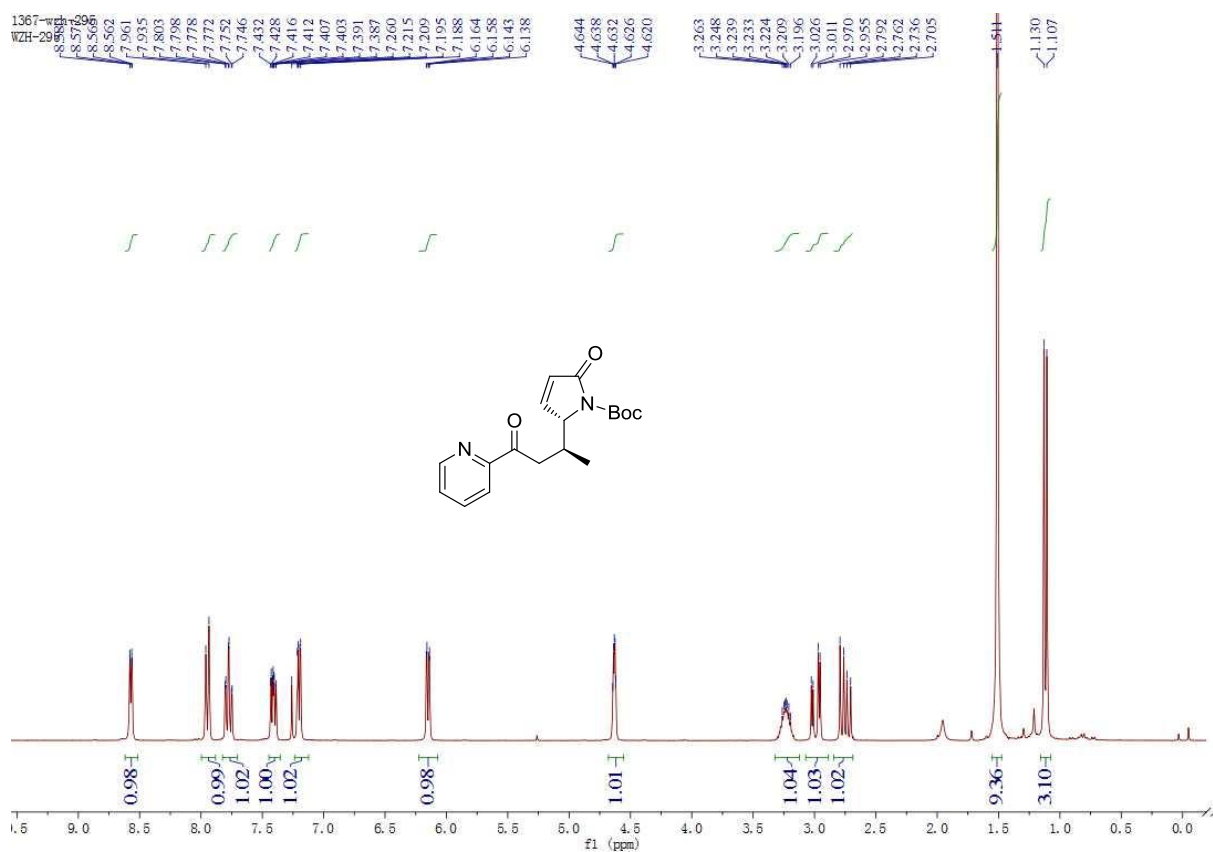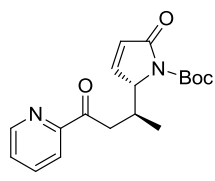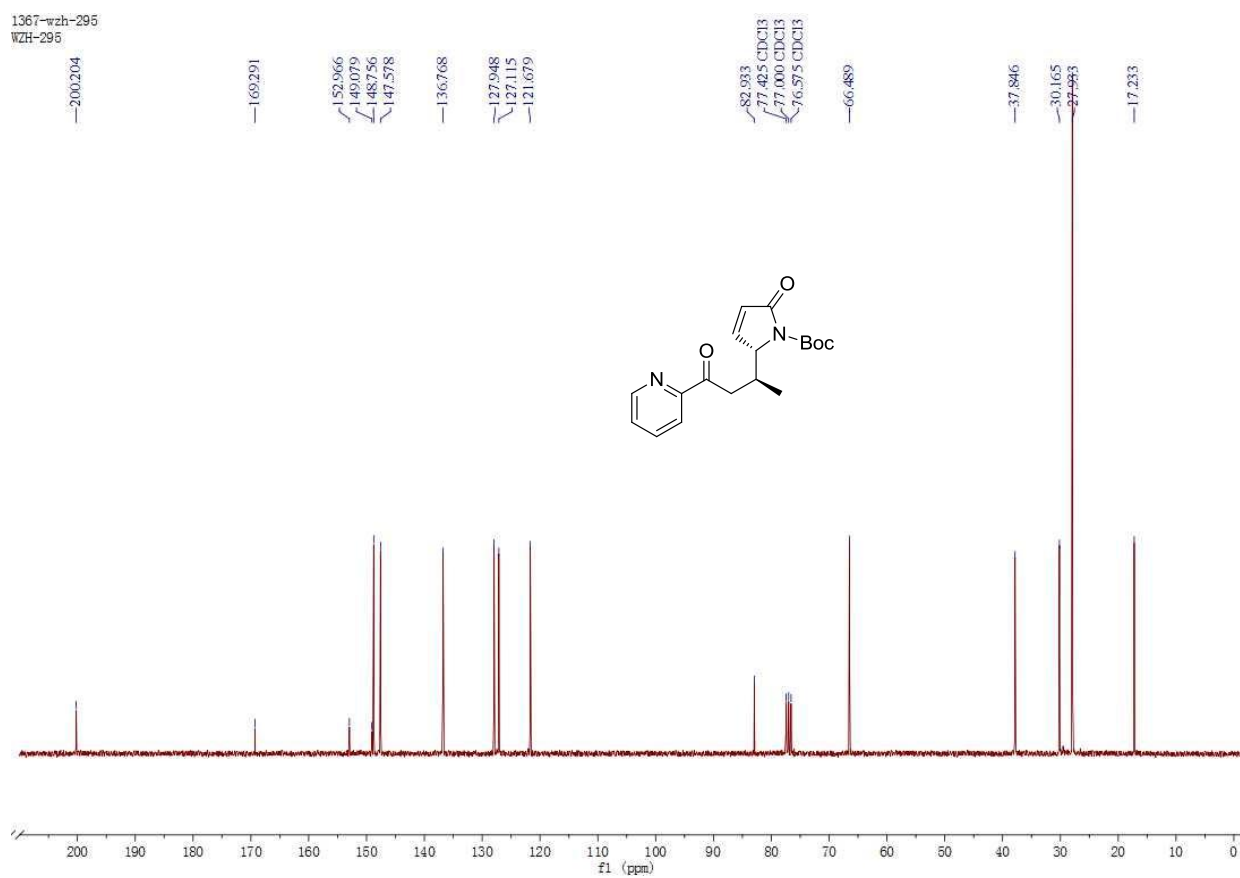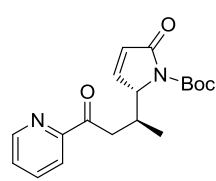

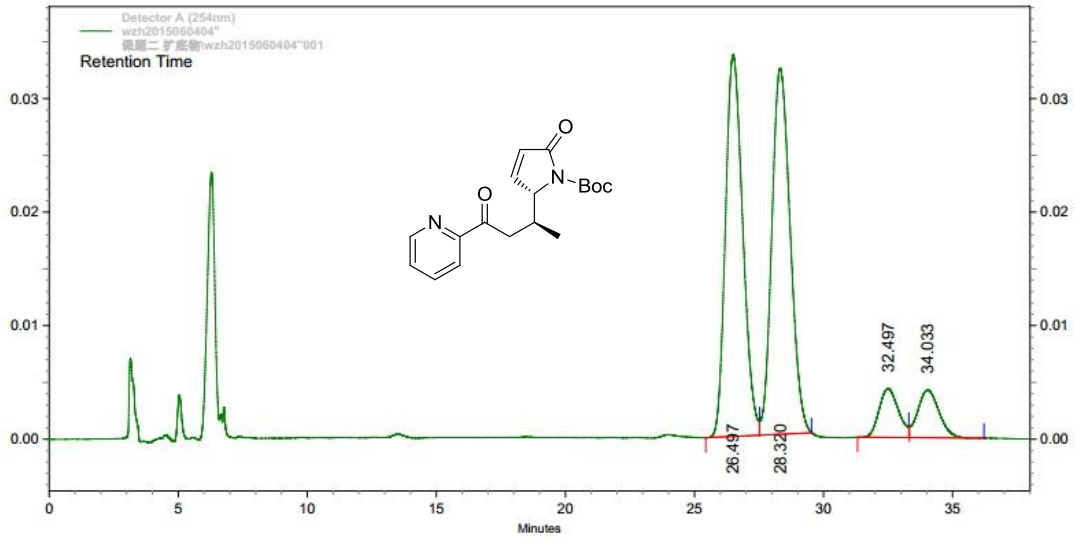

Detector  
A  
(254nm)

| Pk # | Retention Time | Height | Height Percent | Area    | Area Percent |
|------|----------------|--------|----------------|---------|--------------|
| 1    | 26.497         | 33593  | 45.21          | 1564004 | 43.22        |
| 2    | 28.320         | 32239  | 43.39          | 1593745 | 44.04        |
| 3    | 32.497         | 4279   | 5.76           | 222437  | 6.15         |
| 4    | 34.033         | 4191   | 5.64           | 238624  | 6.59         |

| Totals | 74302 | 100.00 | 3618810 | 100.00 |
|--------|-------|--------|---------|--------|
|--------|-------|--------|---------|--------|

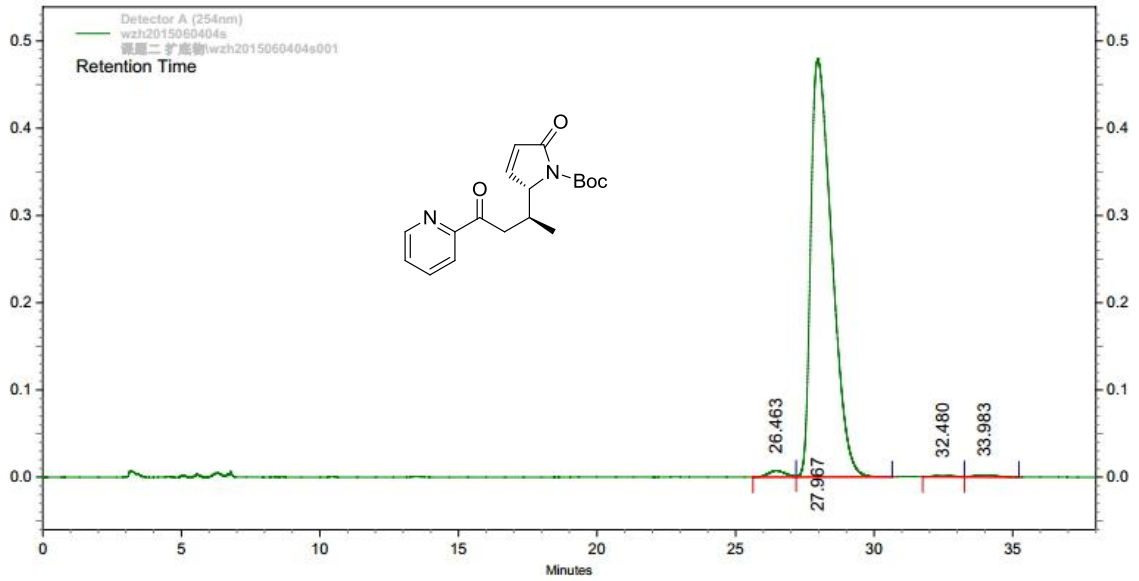

Detector  
A  
(254nm)

| Pk # | Retention Time | Height | Height Percent | Area     | Area Percent |
|------|----------------|--------|----------------|----------|--------------|
| 1    | 26.463         | 7104   | 1.45           | 310926   | 1.21         |
| 2    | 27.967         | 478768 | 97.77          | 25230314 | 98.01        |
| 3    | 32.480         | 1624   | 0.33           | 79985    | 0.31         |
| 4    | 33.983         | 2207   | 0.45           | 121513   | 0.47         |

| Totals | 489703 | 100.00 | 25742738 | 100.00 |
|--------|--------|--------|----------|--------|
|--------|--------|--------|----------|--------|

# <sup>1</sup>H NMR, <sup>13</sup>C NMR and HPLC of 3v

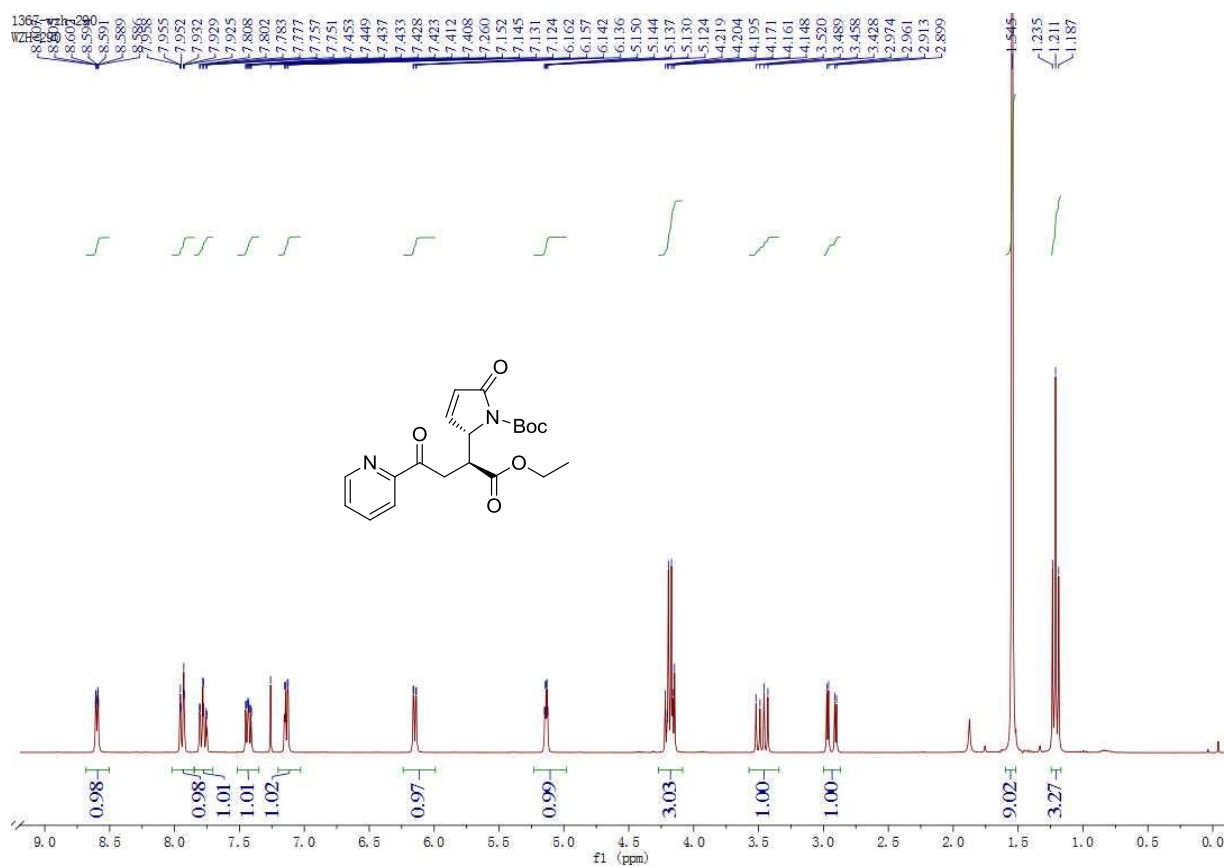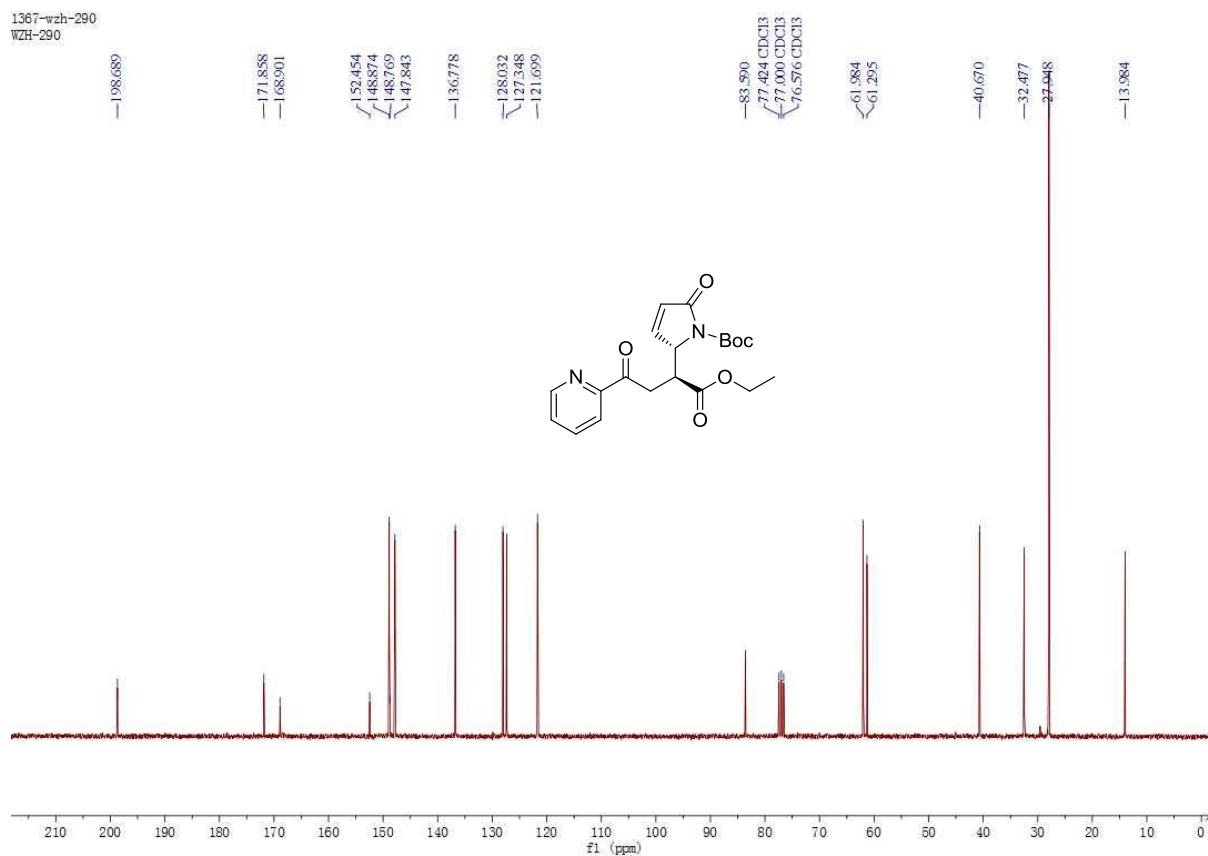

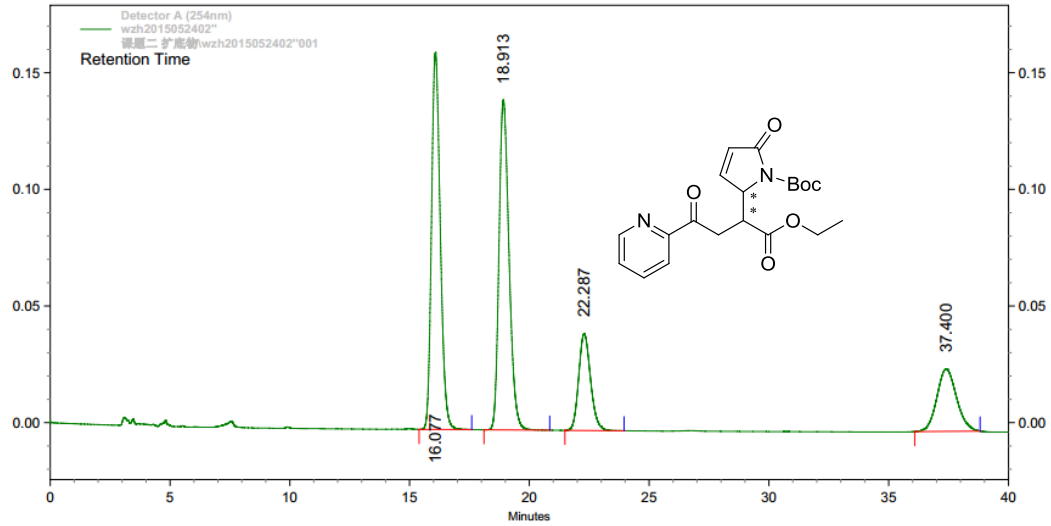

Detector  
A

(254nm)

| PK # | Retention Time | Height | Height Percent | Area    | Area Percent |
|------|----------------|--------|----------------|---------|--------------|
| 1    | 16.077         | 161539 | 43.51          | 4119014 | 36.79        |
| 2    | 18.913         | 141424 | 38.09          | 4120621 | 36.81        |
| 3    | 22.287         | 41553  | 11.19          | 1426871 | 12.74        |
| 4    | 37.400         | 26758  | 7.21           | 1529194 | 13.66        |

| Totals |  | 371274 | 100.00 | 11195700 | 100.00 |
|--------|--|--------|--------|----------|--------|
|--------|--|--------|--------|----------|--------|

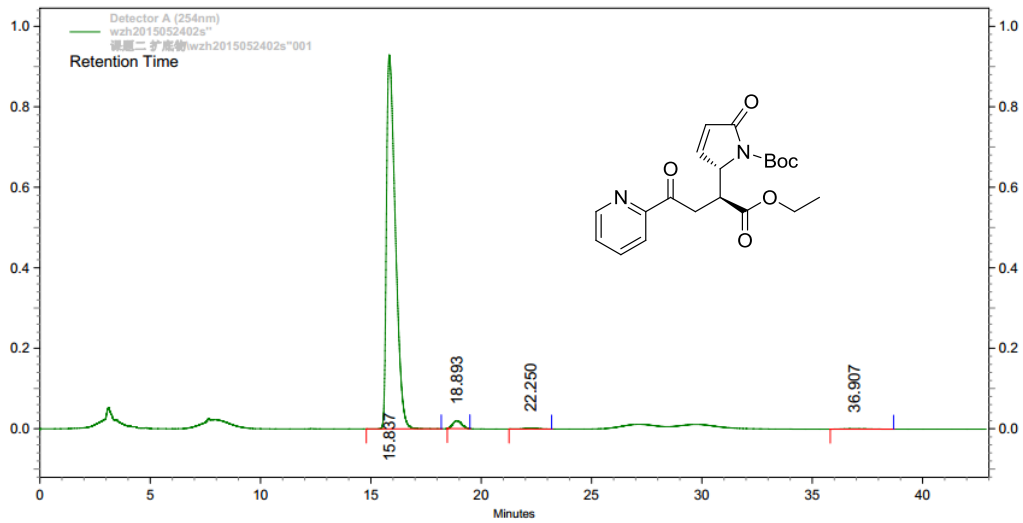

Detector

A

(254nm)

| PK # | Retention Time | Height | Height Percent | Area     | Area Percent |
|------|----------------|--------|----------------|----------|--------------|
| 1    | 15.837         | 928993 | 97.56          | 25995923 | 97.34        |
| 2    | 18.893         | 19710  | 2.07           | 539615   | 2.02         |
| 3    | 22.250         | 2526   | 0.27           | 92342    | 0.35         |
| 4    | 36.907         | 1029   | 0.11           | 79578    | 0.30         |

| Totals |  | 952258 | 100.00 | 26707458 | 100.00 |
|--------|--|--------|--------|----------|--------|
|--------|--|--------|--------|----------|--------|

# <sup>1</sup>H NMR, <sup>13</sup>C NMR and HPLC of 3w

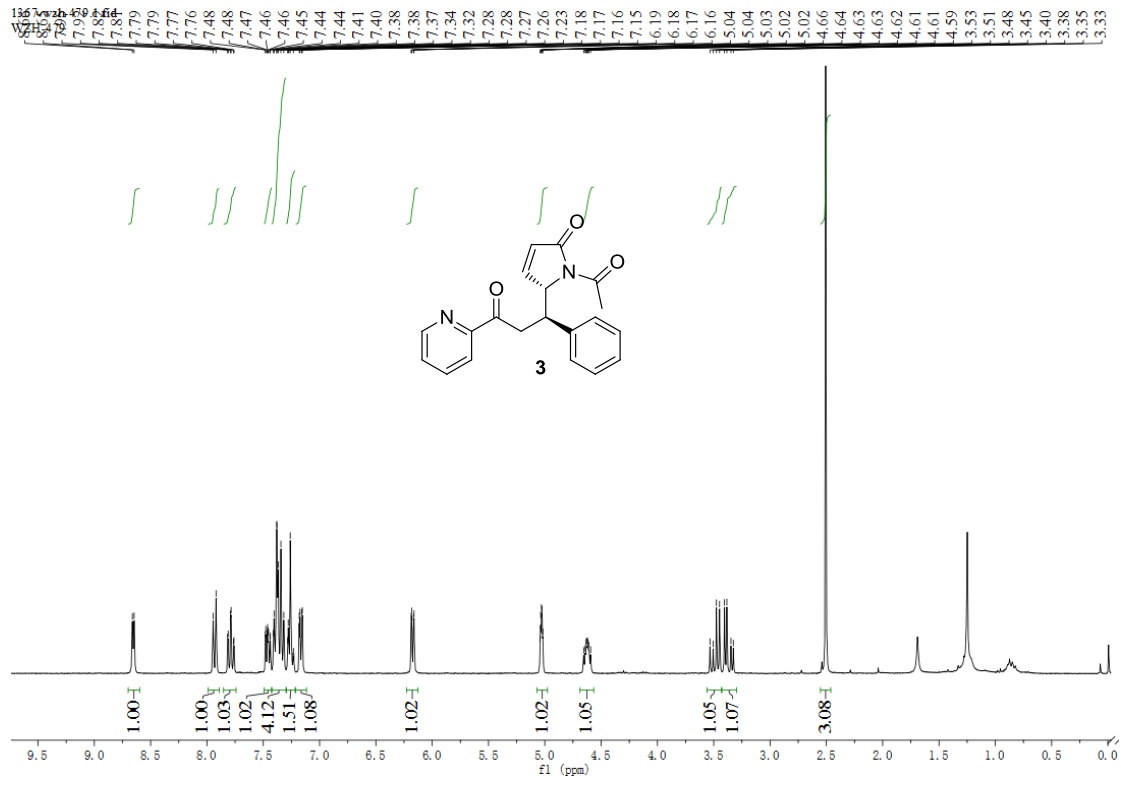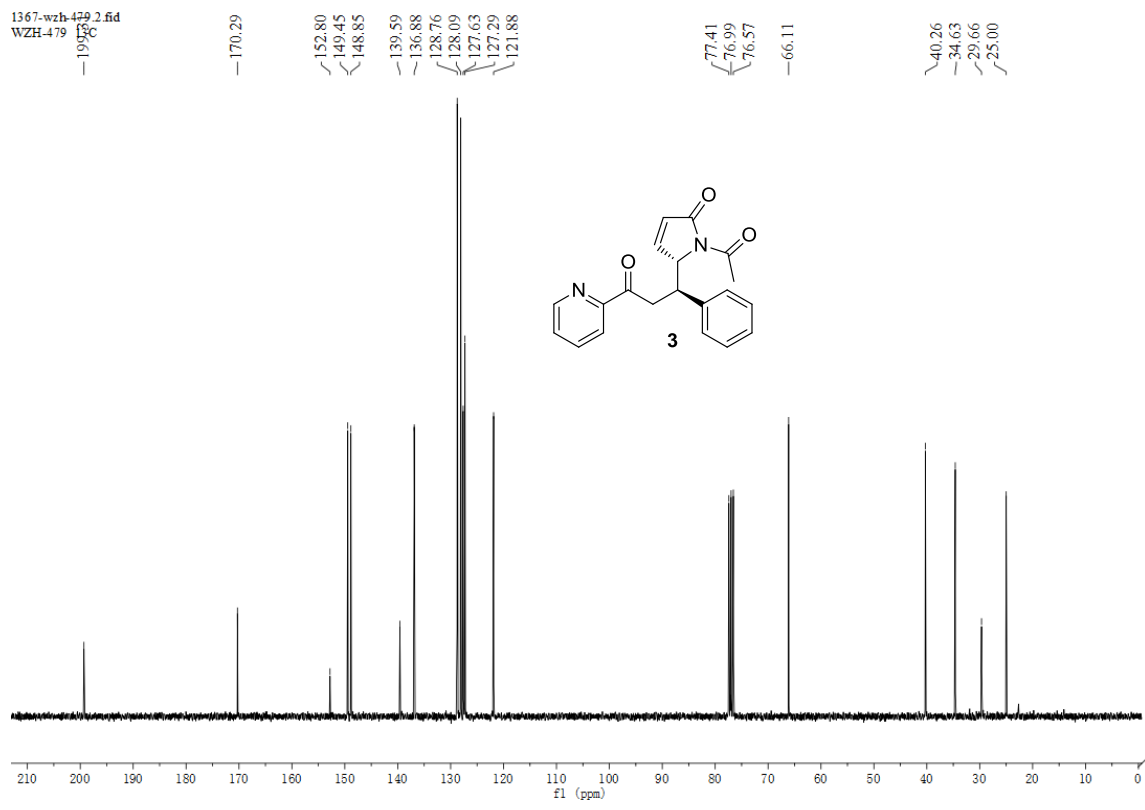

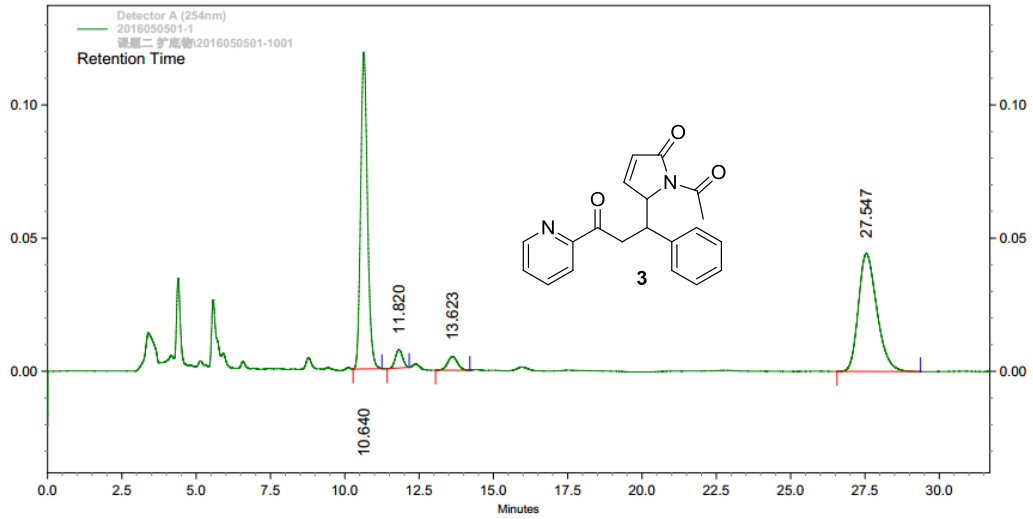

Detector  
A  
(254nm)

| Pk # | Retention Time | Height | Height Percent | Area    | Area Percent |
|------|----------------|--------|----------------|---------|--------------|
| 1    | 10.640         | 118855 | 67.87          | 1884218 | 46.70        |
| 2    | 11.820         | 6848   | 3.91           | 117149  | 2.90         |
| 3    | 13.623         | 5149   | 2.94           | 118684  | 2.94         |
| 4    | 27.547         | 44262  | 25.28          | 1914316 | 47.45        |

| Totals | Height | Height Percent | Area    | Area Percent |
|--------|--------|----------------|---------|--------------|
|        | 175114 | 100.00         | 4034367 | 100.00       |

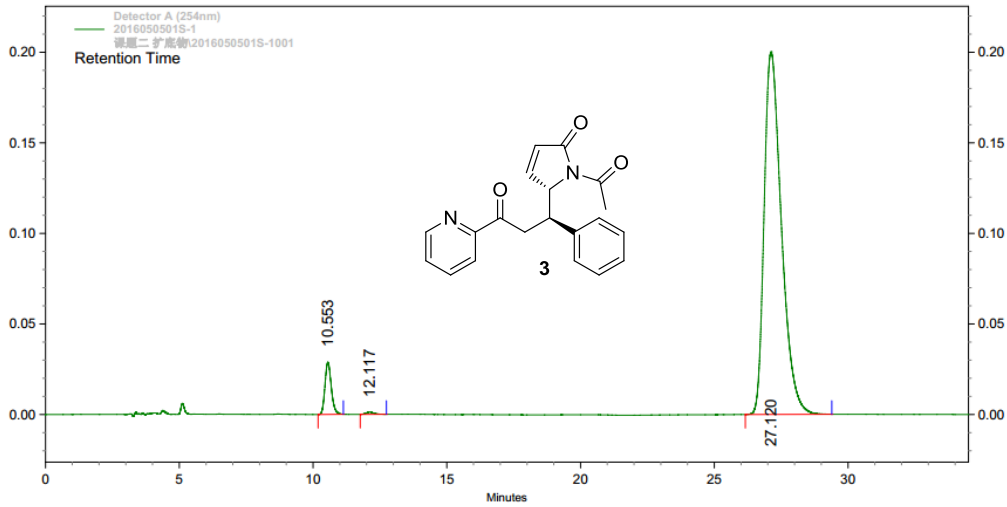

Detector  
A  
(254nm)

| Pk # | Retention Time | Height | Height Percent | Area    | Area Percent |
|------|----------------|--------|----------------|---------|--------------|
| 1    | 10.553         | 28833  | 12.53          | 473764  | 5.00         |
| 2    | 12.117         | 1207   | 0.52           | 24193   | 0.26         |
| 3    | 27.120         | 200151 | 86.95          | 8983057 | 94.75        |

| Totals | Height | Height Percent | Area    | Area Percent |
|--------|--------|----------------|---------|--------------|
|        | 230191 | 100.00         | 9481014 | 100.00       |



# <sup>1</sup>H NMR, <sup>13</sup>C NMR and HPLC of 4

1367-wzh-291  
WZH-291

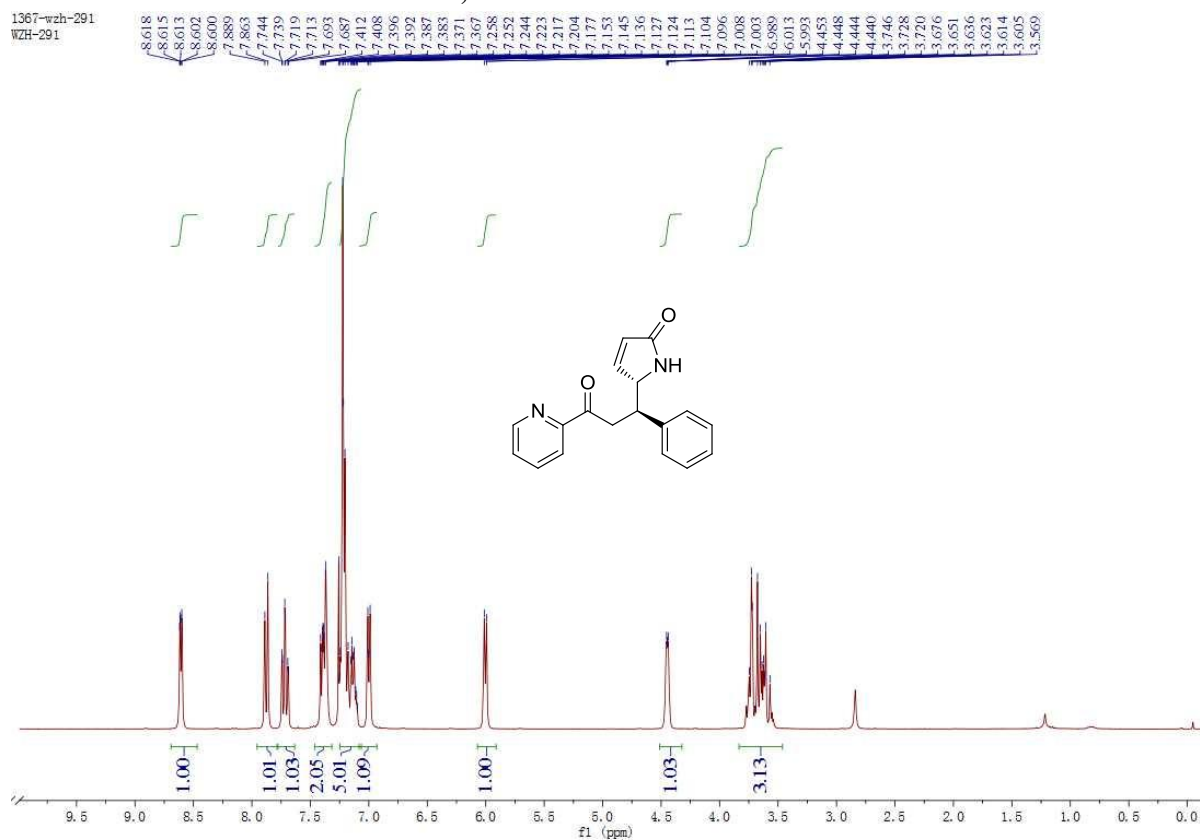

1367-wzh-291  
WZH-291

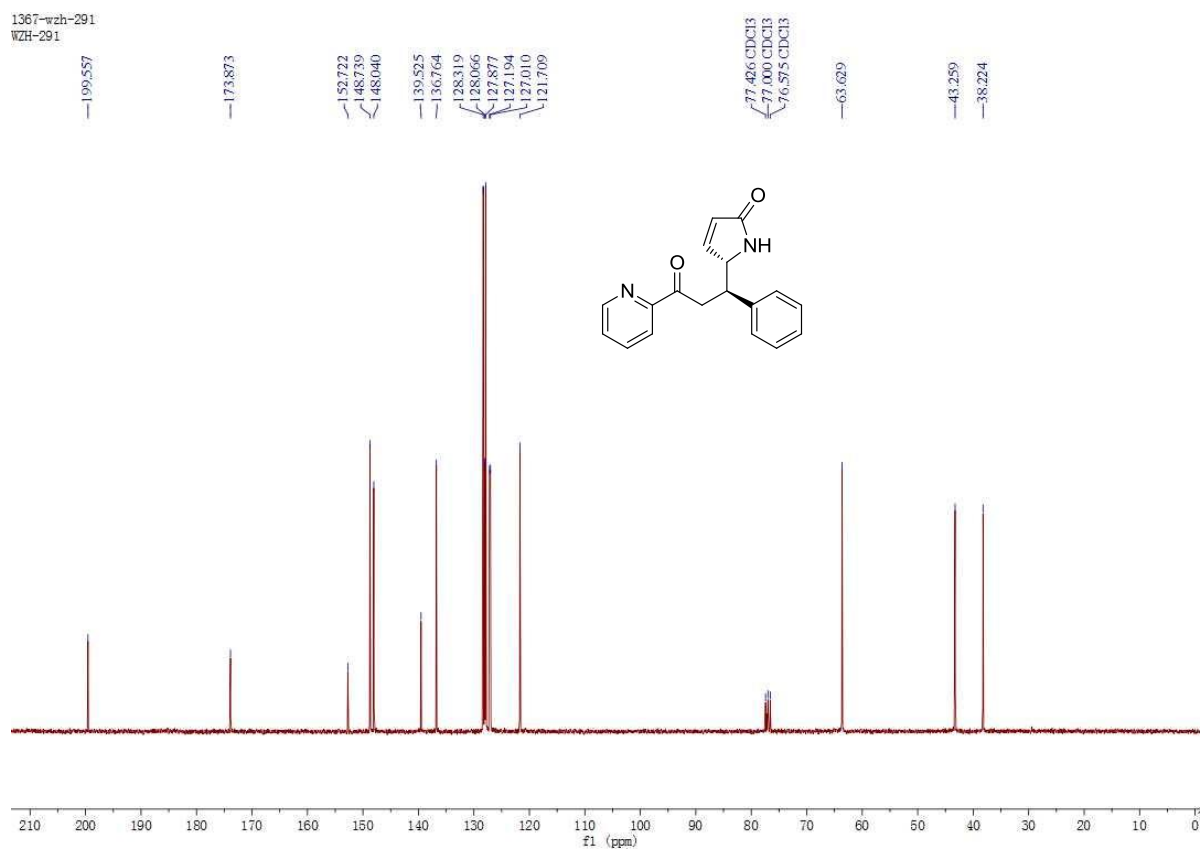

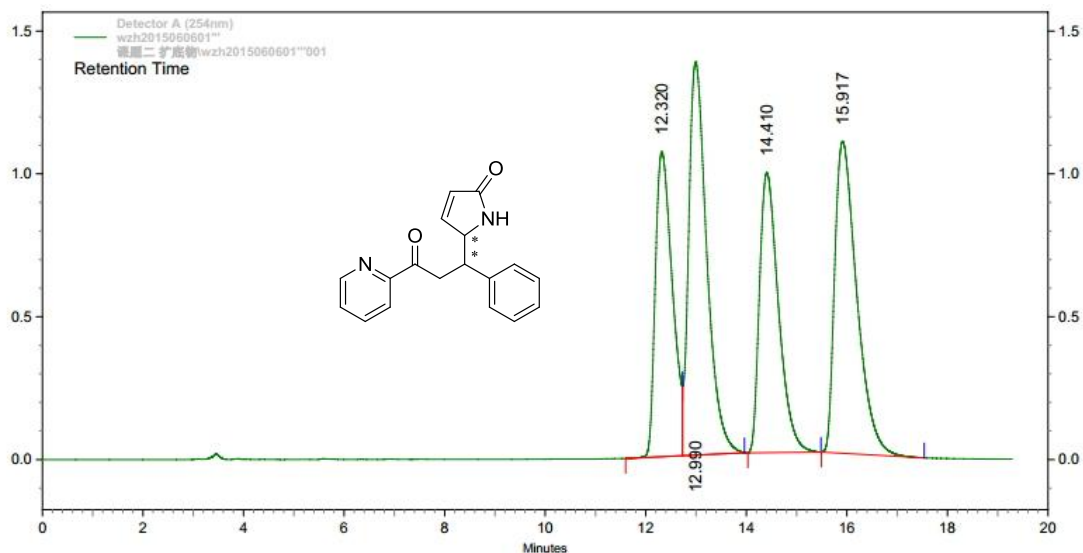

Detector  
A  
(254nm)

| Pk # | Retention Time | Height  | Height Percent | Area     | Area Percent |
|------|----------------|---------|----------------|----------|--------------|
| 1    | 12.320         | 1067333 | 23.64          | 25003393 | 21.11        |
| 2    | 12.990         | 1376092 | 30.48          | 34540922 | 29.17        |
| 3    | 14.410         | 979735  | 21.70          | 25716421 | 21.71        |
| 4    | 15.917         | 1091456 | 24.18          | 33170086 | 28.01        |

| Totals | Height  | Height Percent | Area      | Area Percent |
|--------|---------|----------------|-----------|--------------|
|        | 4514616 | 100.00         | 118430822 | 100.00       |

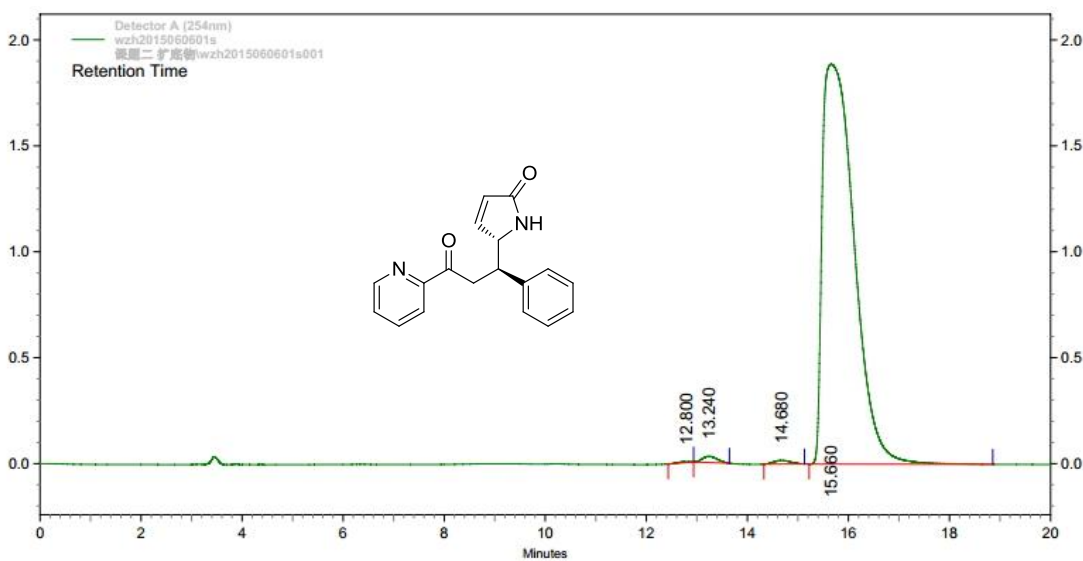

Detector  
A  
(254nm)

| Pk # | Retention Time | Height  | Height Percent | Area     | Area Percent |
|------|----------------|---------|----------------|----------|--------------|
| 1    | 12.800         | 4399    | 0.23           | 72450    | 0.09         |
| 2    | 13.240         | 29226   | 1.51           | 592974   | 0.71         |
| 3    | 14.680         | 17457   | 0.90           | 408249   | 0.49         |
| 4    | 15.660         | 1888200 | 97.37          | 82653223 | 98.72        |

| Totals | Height  | Height Percent | Area     | Area Percent |
|--------|---------|----------------|----------|--------------|
|        | 1939282 | 100.00         | 83726896 | 100.00       |

# <sup>1</sup>H NMR, <sup>13</sup>C NMR, NOE and HPLC of 5

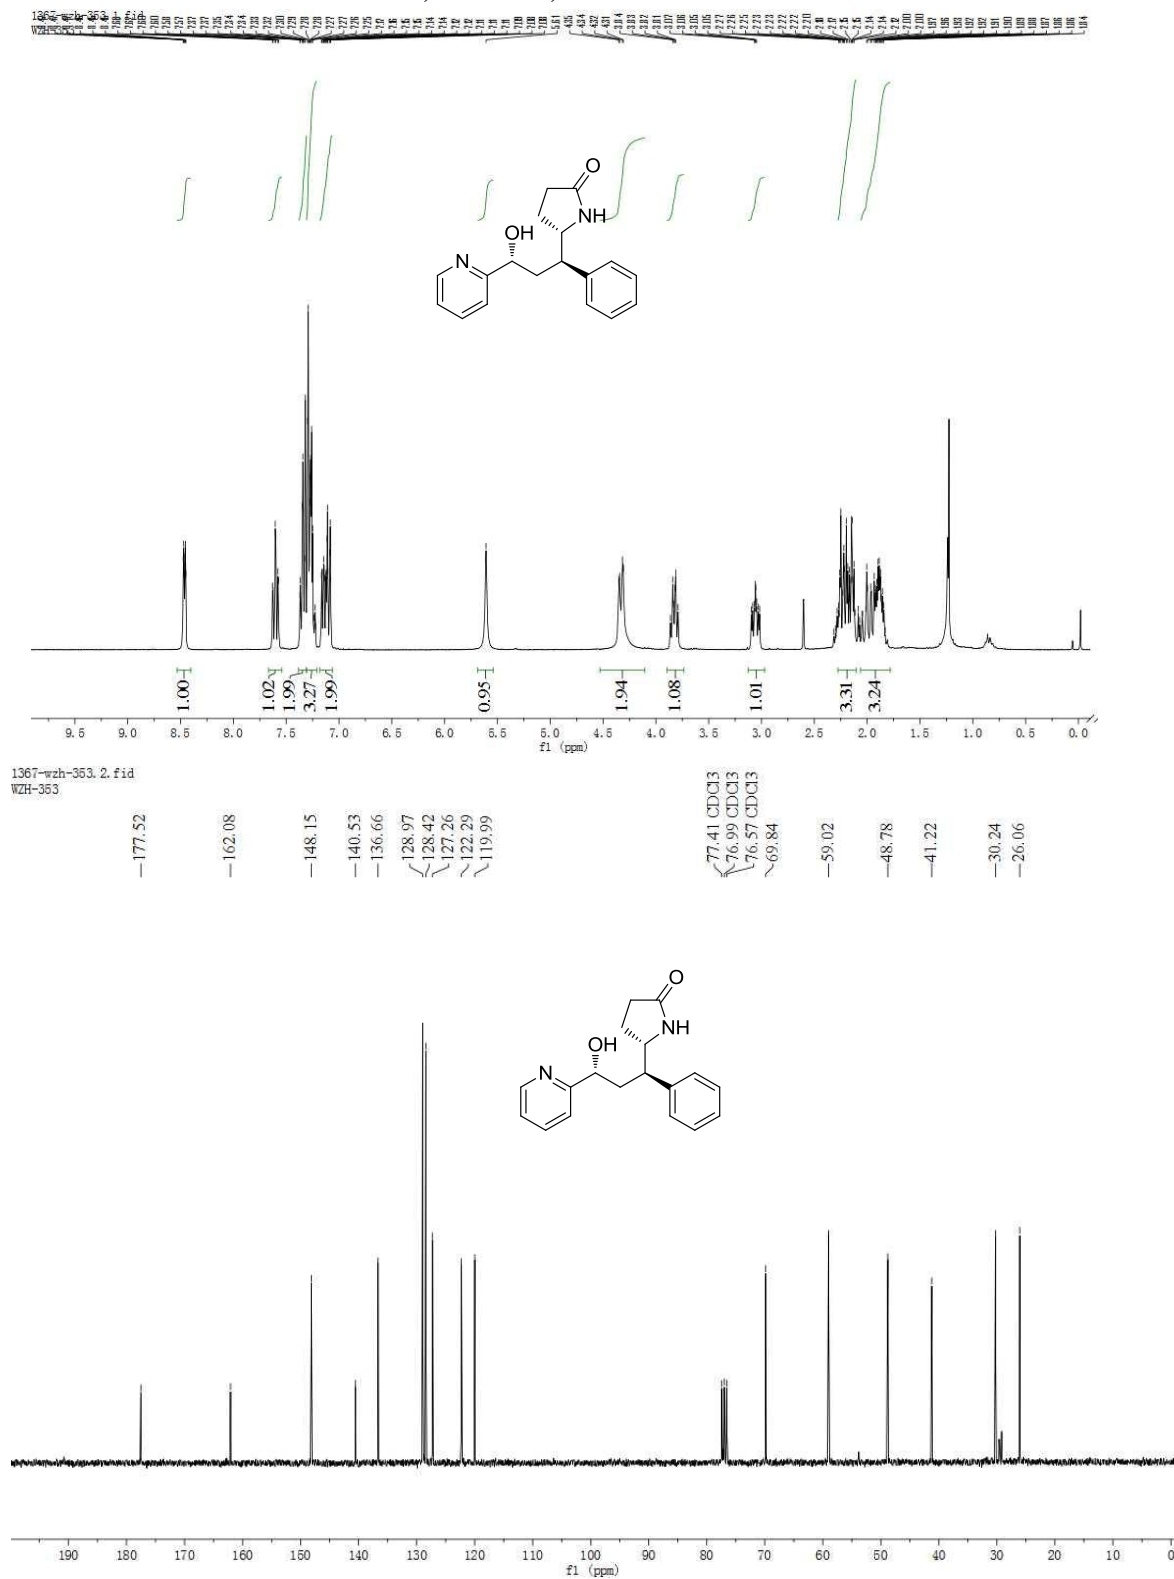

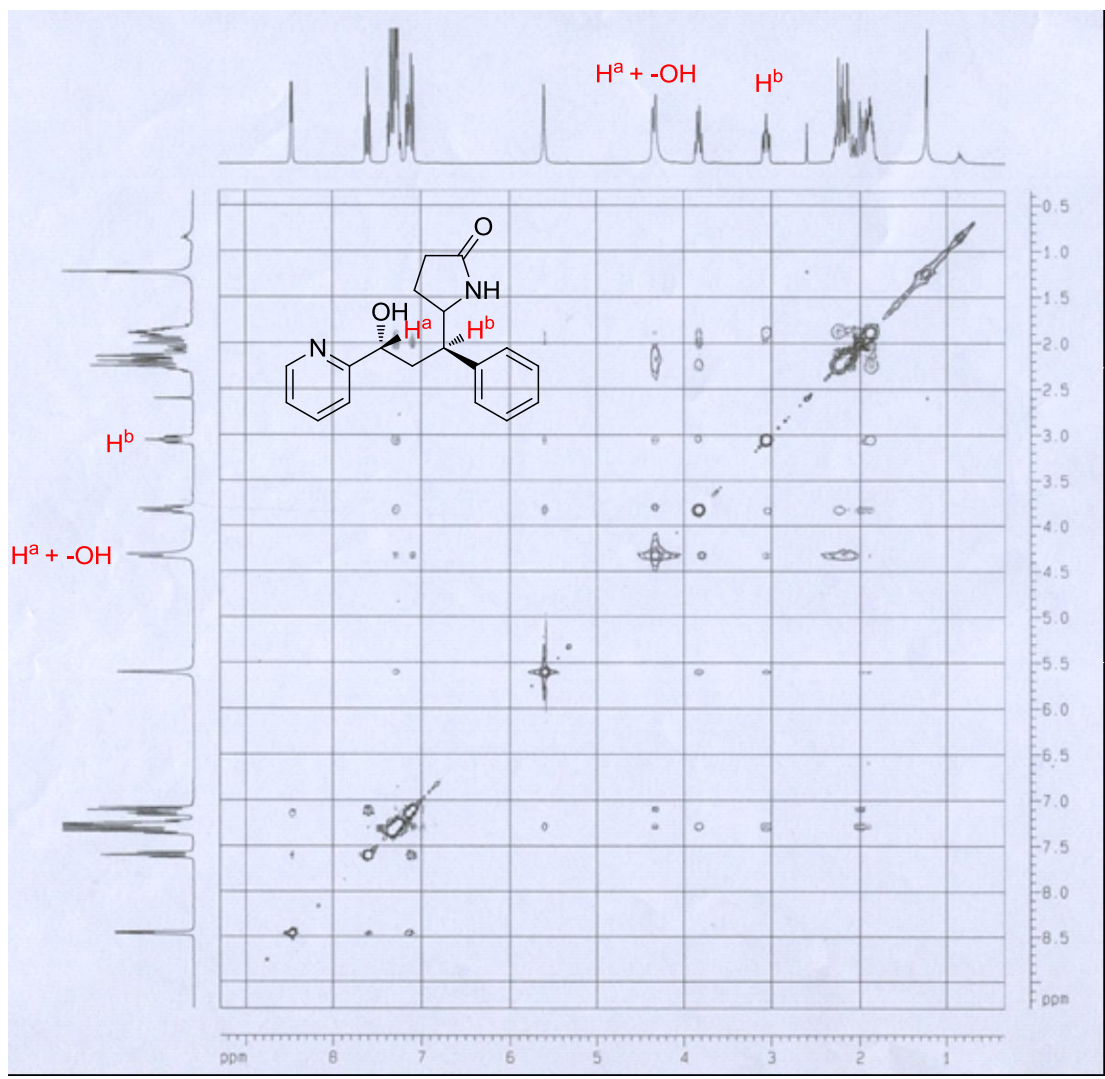

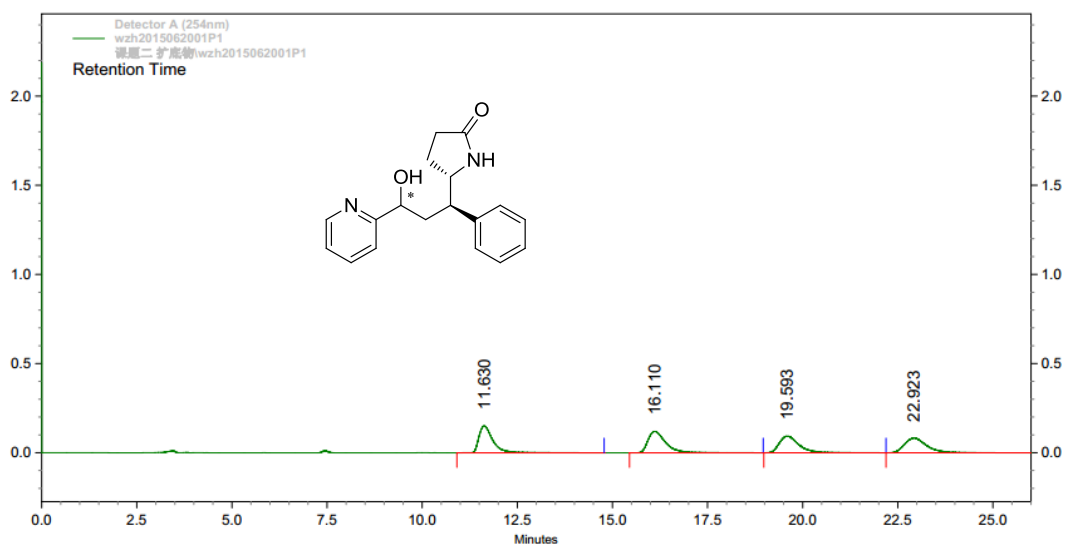

Detector  
A  
(254nm)

| Pk # | Retention Time | Height | Height Percent | Area    | Area Percent |
|------|----------------|--------|----------------|---------|--------------|
| 1    | 11.630         | 150176 | 33.72          | 3841800 | 26.48        |
| 2    | 16.110         | 119889 | 26.92          | 3892792 | 26.83        |
| 3    | 19.593         | 93310  | 20.95          | 3380523 | 23.30        |
| 4    | 22.923         | 82021  | 18.42          | 3394057 | 23.39        |

| Totals | Height | Height Percent | Area     | Area Percent |
|--------|--------|----------------|----------|--------------|
|        | 445396 | 100.00         | 14509172 | 100.00       |

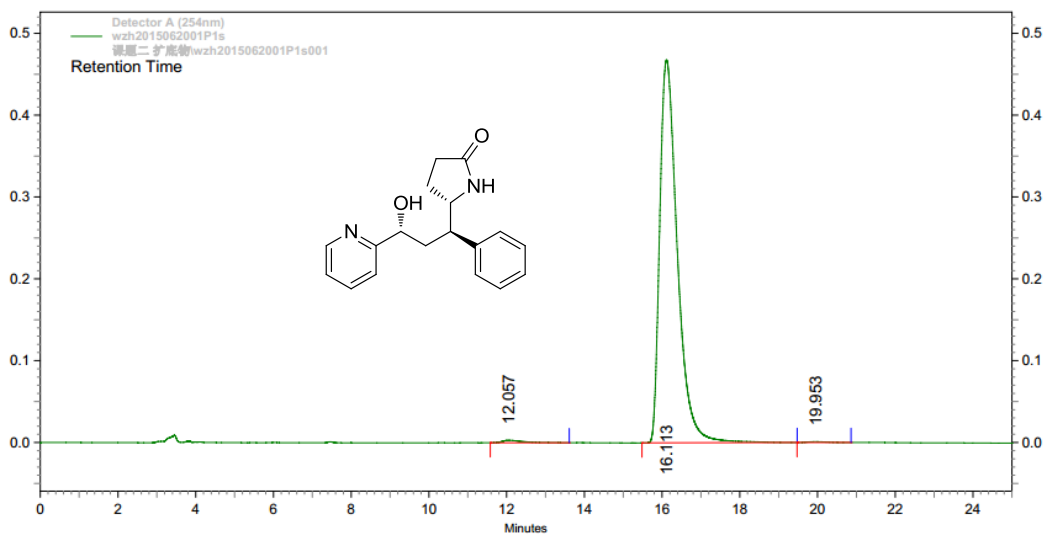

Detector  
A  
(254nm)

| Pk # | Retention Time | Height | Height Percent | Area     | Area Percent |
|------|----------------|--------|----------------|----------|--------------|
| 1    | 12.057         | 2979   | 0.63           | 108269   | 0.73         |
| 2    | 16.113         | 467882 | 99.17          | 14741615 | 99.04        |
| 3    | 19.953         | 934    | 0.20           | 34921    | 0.23         |

| Totals | Height | Height Percent | Area     | Area Percent |
|--------|--------|----------------|----------|--------------|
|        | 471795 | 100.00         | 14884805 | 100.00       |

# <sup>1</sup>H NMR, <sup>13</sup>C NMR, NOE and HPLC of 6

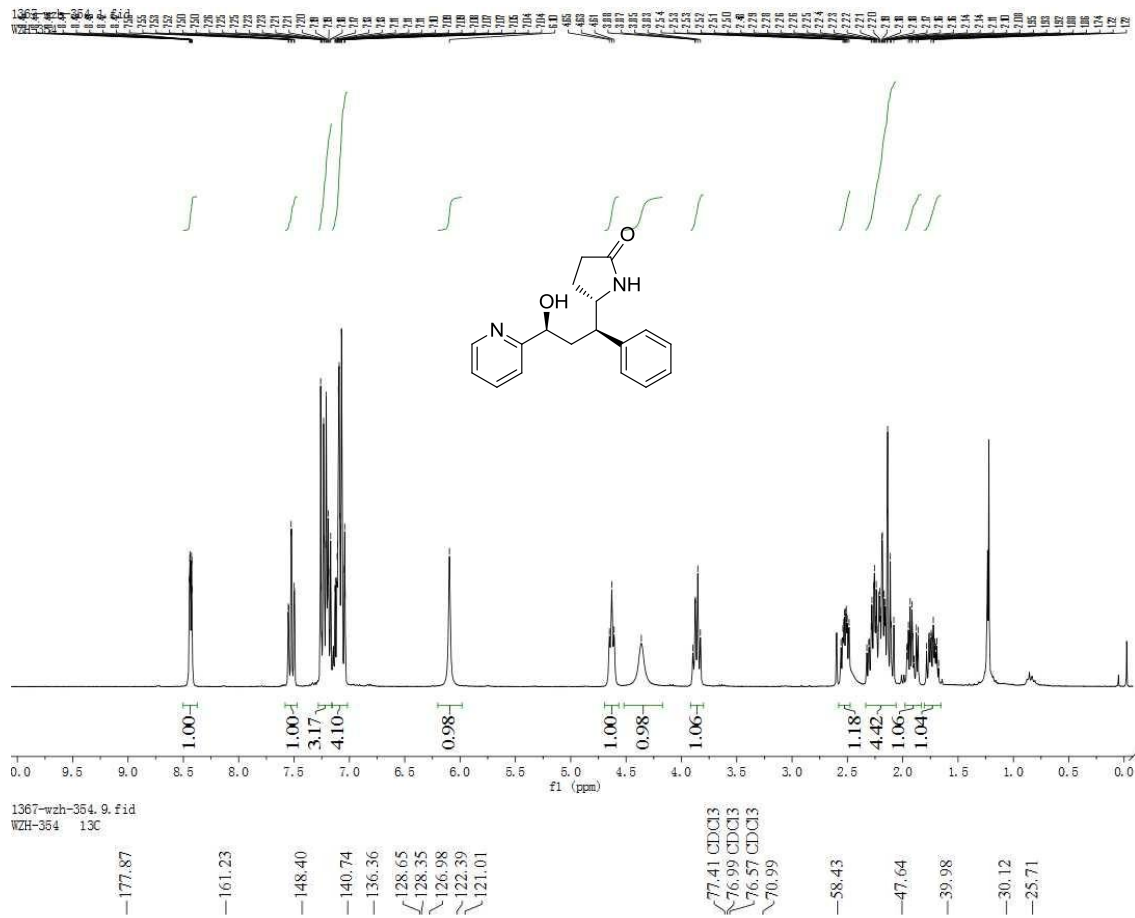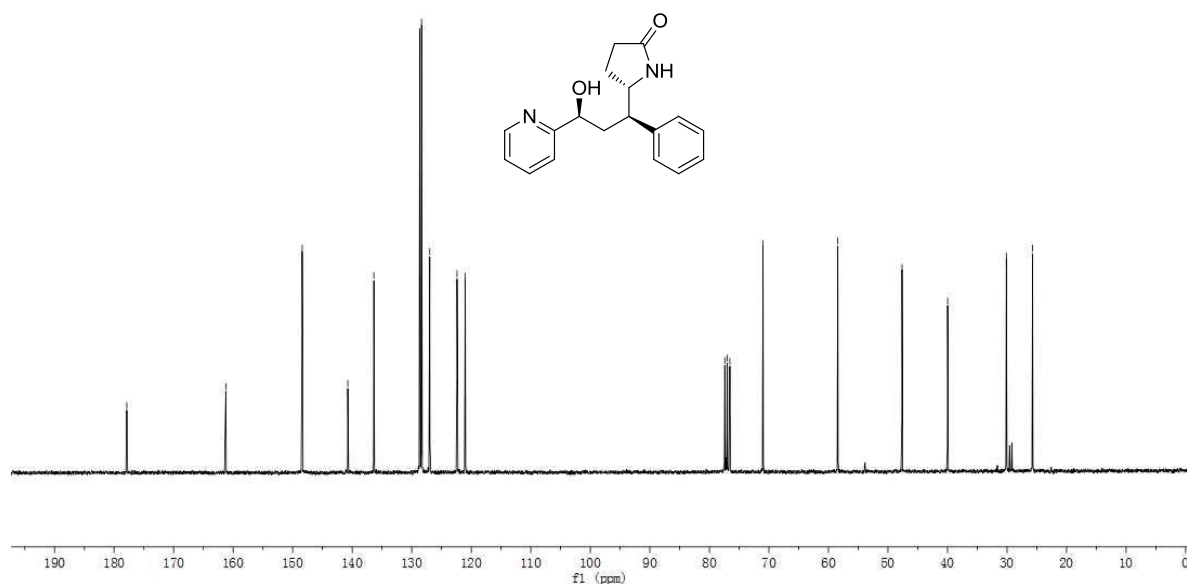

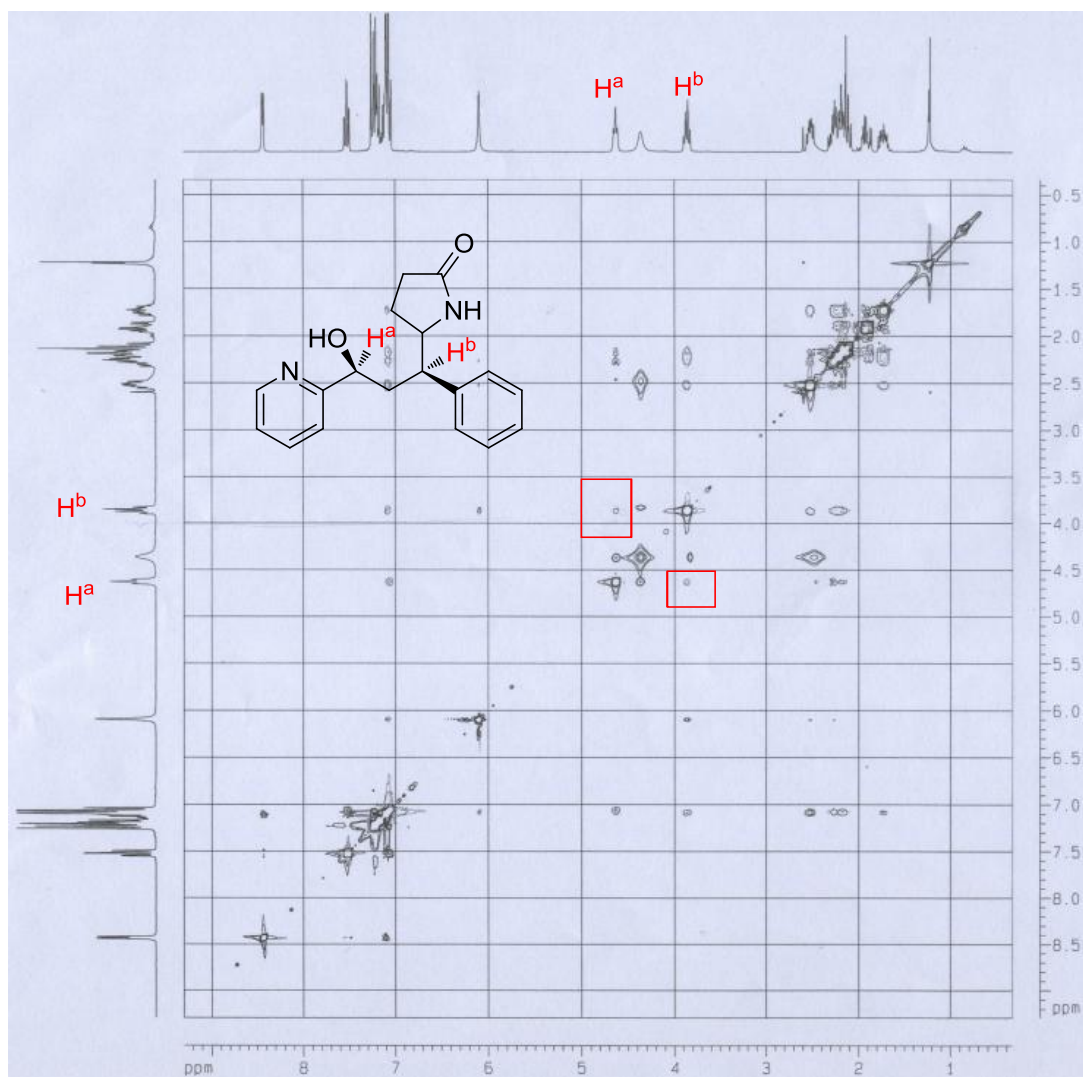

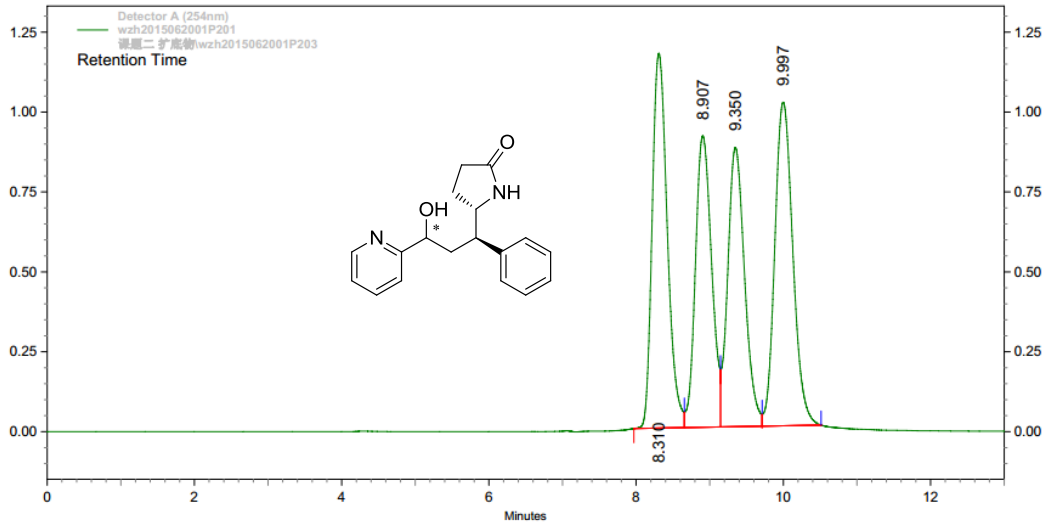

Detector  
A  
(254nm)

| Pk # | Retention Time | Height  | Height Percent | Area     | Area Percent |
|------|----------------|---------|----------------|----------|--------------|
| 1    | 8.310          | 1172339 | 29.53          | 16718002 | 27.00        |
| 2    | 8.907          | 911725  | 22.97          | 13933173 | 22.50        |
| 3    | 9.350          | 873336  | 22.00          | 14009402 | 22.62        |
| 4    | 9.997          | 1012377 | 25.50          | 17264851 | 27.88        |

| Totals |  | 3969777 | 100.00 | 61925428 | 100.00 |
|--------|--|---------|--------|----------|--------|
|--------|--|---------|--------|----------|--------|

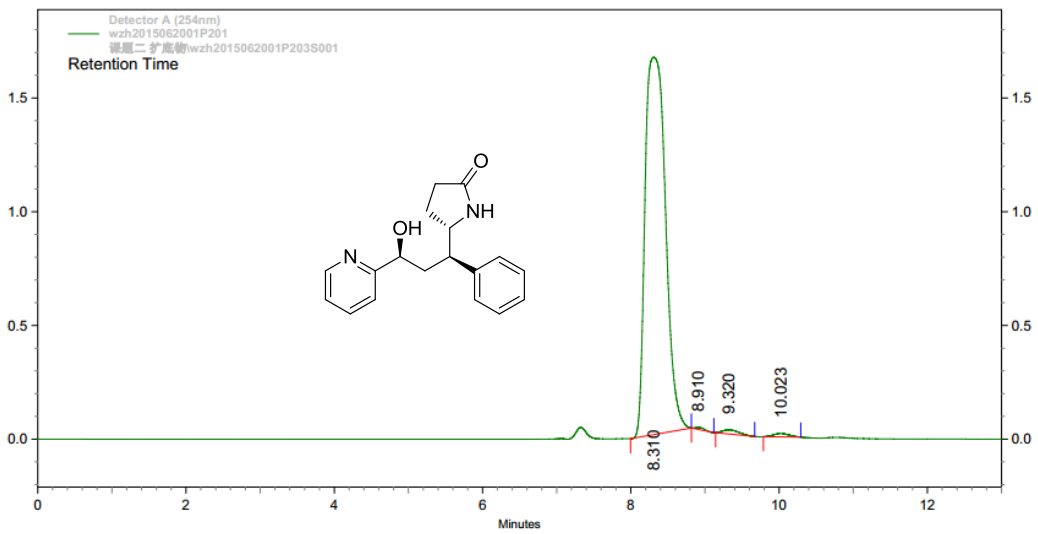

Detector  
A  
(254nm)

| Pk # | Retention Time | Height  | Height Percent | Area     | Area Percent |
|------|----------------|---------|----------------|----------|--------------|
| 1    | 8.310          | 1658558 | 97.58          | 31844789 | 98.20        |
| 2    | 8.910          | 8299    | 0.49           | 77066    | 0.24         |
| 3    | 9.320          | 18061   | 1.06           | 286113   | 0.88         |
| 4    | 10.023         | 14793   | 0.87           | 219195   | 0.68         |

| Totals |  | 1699711 | 100.00 | 32427163 | 100.00 |
|--------|--|---------|--------|----------|--------|
|--------|--|---------|--------|----------|--------|
